# Supplementary material for: Theoretical study on the copper-catalyzed asymmetric alkene trifluoromethyl–arylation cross-coupling reaction: origin of regio- and stereo-selectivity
Source: Royal Society of Chemistry journal article supplement (doi:10.1039/d3cy01309j), 2023-12-18
Supplement: d3cy01309j1.pdf [file d3cy01309j1.pdf]

## Supporting Information

# Theoretical Study on Copper-Catalyzed Asymmetric Alkene Trifluoromethyl-arylation Cross-coupling Reaction: Origin of Regio- and Stereo-selectivity

*Dianmin Zhang,<sup>a</sup> Guoliang Li,<sup>a</sup> Chengcheng Fang,<sup>a</sup> Jiangping Meng<sup>\*a,b,c</sup> and Song Liu<sup>\*a,b,c</sup>*

<sup>a</sup> Chongqing Key Laboratory of Environmental Materials and Remediation Technologies, College of Chemistry and Environmental Engineering, Chongqing University of Arts and Sciences, Chongqing, 402160, P. R. China

<sup>b</sup> School of Chemistry and Chemical Engineering, Chongqing University, Chongqing 400030, China

<sup>c</sup> Chongqing Precision Medical Industry Technology Research Institute, Chongqing 400084, P. R. China

## Table of Contents

1. The calculated free energy profiles for Paths I using *N*-methyl-acrylamide **1b** as substrate. Page S2
2. The calculated free energy profiles for Paths I using ketone **1c** as substrate. Page S2
3. The calculated structure information and free energy of two conformations for **INT4** and **INT4'**. Page S3
4. The calculated free energy profiles for neutral pathway. Page S3
5. The calculated free energy profiles for the pathway involving coordination of the methanol. Page S4
6. Completes reference for Gaussian 16. Page S4
7. M06-L absolute calculation energies, enthalpies, and free energies. Page S5
8. M06-L geometries for all the optimized compounds and transition states. Page S7

### 1. The calculated Free energy profiles for Paths I using *N*-methyl-acrylamide **1b** as substrate.

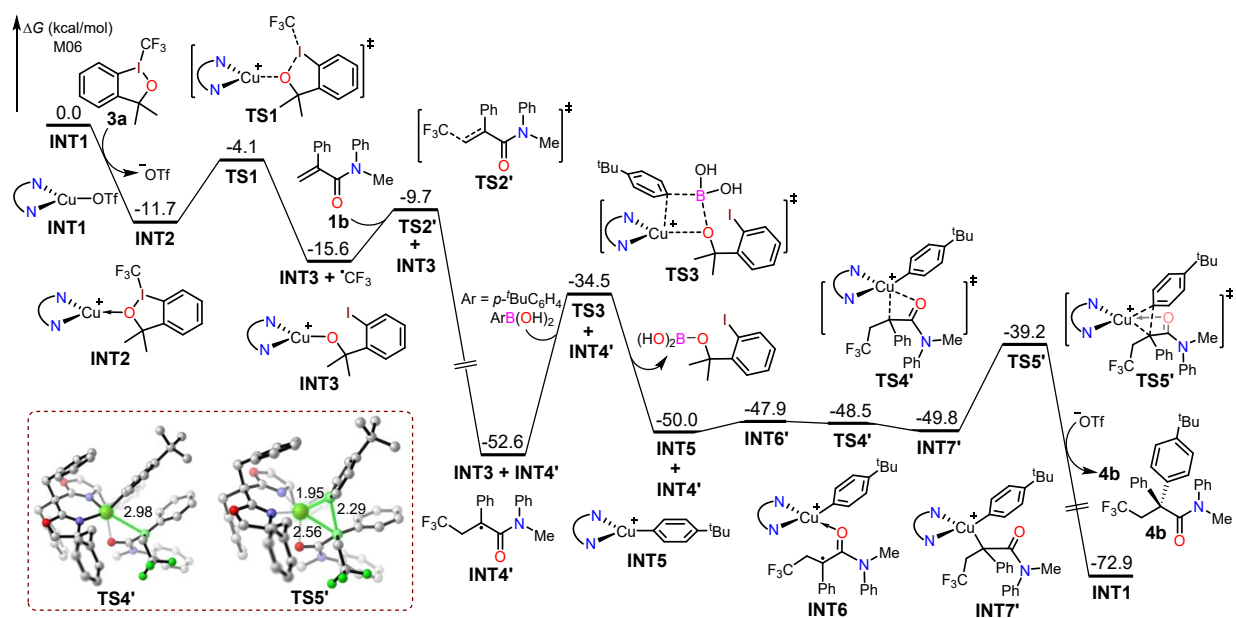

**Figure S1.** Free energy profiles and structural information for Paths I using *N*-methyl-acrylamide **1b** as substrate. Key bond distances are in angstroms.

## 2. The calculated Free energy profiles for Paths I using ketone **1c** as substrate.

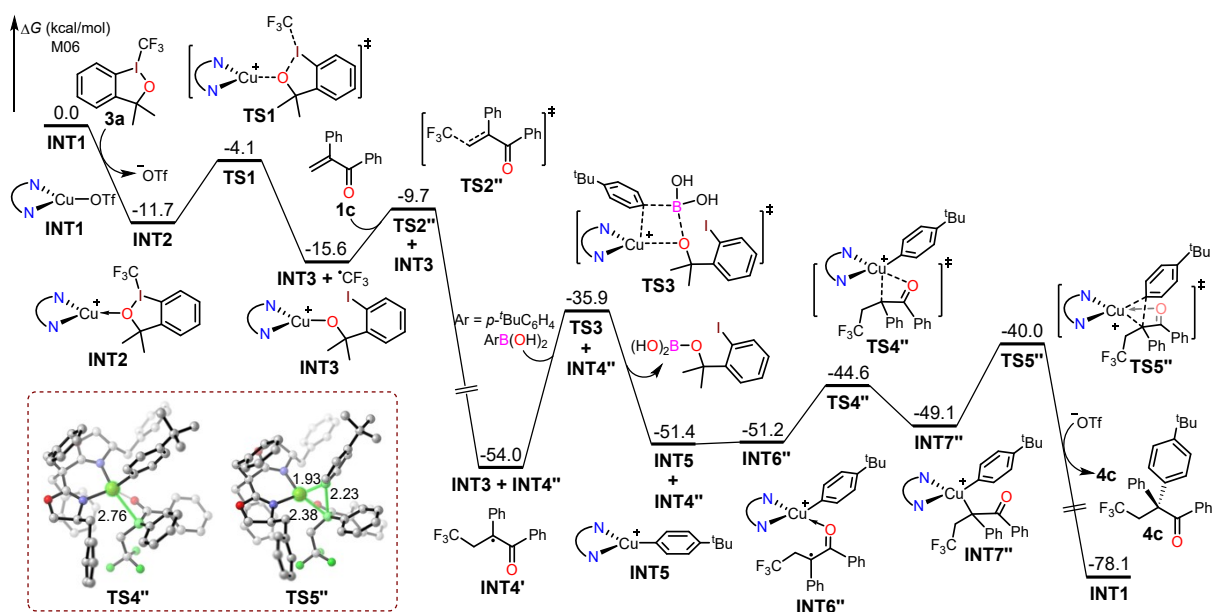

**Figure S2.** Free energy profiles and structural information for Paths I using ketone **1c** as substrate. Key bond distances are in angstroms.

## 3. The calculated structure information and free energy of two conformations for INT4 and INT4'.

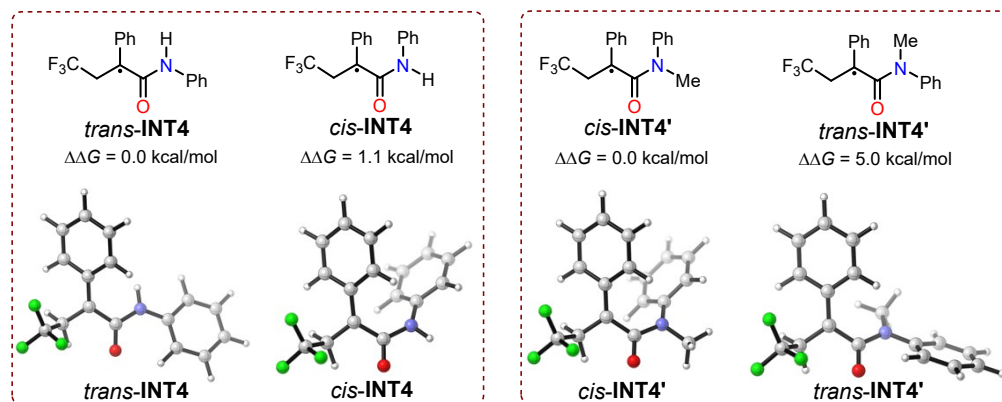

**Figure S3.** The calculated structure information and free energy of two conformations for INT4 and INT4'.

## 4. The calculated free energy profiles for neutral pathway.

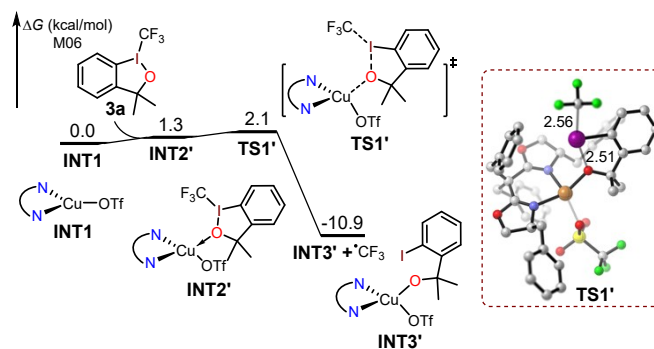

**Figure S4.** Free energy profiles for neutral pathway.

As depicted in Figure S4, we also examined the neutral pathway for the Cu-catalyzed asymmetric alkene trifluoromethyl-arylation cross-coupling reaction. The calculated results revealed that the free energy of **TS1'** is 6.2 kcal/mol higher than that of **TS1**, indicating that this neutral pathway is unfavorable.

## 5. The calculated free energy profiles for the pathway involving coordination of the methanol.

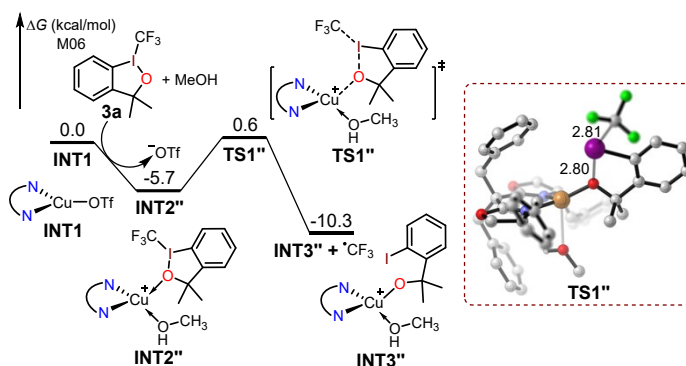

**Figure S5.** Free energy profiles for the pathway involving coordination of the methanol.

As depicted in Figure S5, we also examined the pathway involving coordination of the methanol. The calculated results revealed that the free energy of **TS1''** is 4.7 kcal/mol higher than that of **TS1**, indicating that this pathway is also unfavorable.

## 6. Complete reference for Gaussian 16

M. J. Frisch, G. W. Trucks, H. B. Schlegel, G. E. Scuseria, M. A. Robb, J. R. Cheeseman, G. Scalmani, V. Barone, G. A. Petersson, H. Nakatsuji, X. Li, M. Caricato, A. V. Marenich, J. Bloino, B. G. Janesko, R. Gomperts, B. Mennucci, H. P. Hratchian, J. V. Ortiz, A. F. Izmaylov, J. L. Sonnenberg, D. Williams-

Young, F. Ding, F. Lipparini, F. Egidi, J. Goings, B. Peng, A. Petrone, T. Henderson, D. Ranasinghe, V. G. Zakrzewski, J. Gao, N. Rega, G. Zheng, W. Liang, M. Hada, M. Ehara, K. Toyota, R. Fukuda, J. Hasegawa, M. Ishida, T. Nakajima, Y. Honda, O. Kitao, H. Nakai, T. Vreven, K. Throssell, J. A. Montgomery, Jr., J. E. Peralta, F. Ogliaro, M. J. Bearpark, J. J. Heyd, E. N. Brothers, K. N. Kudin, V. N. Staroverov, T. A. Keith, R. Kobayashi, J. Normand, K. Raghavachari, A. P. Rendell, J. C. Burant, S. S. Iyengar, J. Tomasi, M. Cossi, J. M. Millam, M. Klene, C. Adamo, R. Cammi, J. W. Ochterski, R. L. Martin, K. Morokuma, O. Farkas, J. B. Foresman, and D. J. Fox, Gaussian, Inc., Wallingford CT, 2016.

## 7. M06-L absolute calculation energies, enthalpies, and free energies.

**Table S1.** M06-L absolute calculation energies, enthalpies, and free energies.

| Geometry                                                                            | $E_{(\text{elec-M06-L})}^1$ | $H_{(\text{corr-M06-L P})}^2$ | $G_{(\text{corr-M06-L})}^3$ | $E_{(\text{solv-M06-L})}^4$ | IF <sup>5</sup> |
|-------------------------------------------------------------------------------------|-----------------------------|-------------------------------|-----------------------------|-----------------------------|-----------------|
| <b>INT1</b>                                                                         | -2771.600405                | 0.687292                      | 0.560326                    | -2772.248421                | -               |
| <b>3a</b>                                                                           | -772.990264                 | 0.196582                      | 0.137192                    | -773.2369394                | -               |
| ·OTf                                                                                | -961.439967                 | 0.03562                       | -0.004819                   | -961.725638                 | -               |
| <b>INT2</b>                                                                         | -2583.050593                | 0.848779                      | 0.703338                    | -2583.779400                | -               |
| <b>TS1</b>                                                                          | -2583.035819                | 0.847659                      | 0.700845                    | -2583.764817                | -56.2           |
| <b>INT3</b>                                                                         | -2245.517826                | 0.830507                      | 0.694535                    | -2246.146347                | -               |
| ·CF3                                                                                | -337.5130629                | 0.016544                      | -0.014566                   | -337.6158581                | -               |
| <b>TS2</b>                                                                          | -1046.823693                | 0.275388                      | 0.206404                    | -1047.127871                | -38.7           |
| <b>1a</b>                                                                           | -709.303519                 | 0.257798                      | 0.201158                    | -709.504483                 | -               |
| <b>INT4</b>                                                                         | -1046.897806                | 0.278048                      | 0.211492                    | -1047.204045                | -               |
| <b>TS3</b>                                                                          | -2810.968021                | 1.083092                      | 0.920847                    | -2811.762687                | -184.1          |
| ArB(OH) <sub>2</sub>                                                                | -565.427306                 | 0.251680                      | 0.200018                    | -565.6189899                | -               |
| <b>INT5</b>                                                                         | -2198.817557                | 0.865898                      | 0.738379                    | -2199.43391                 | -               |
| 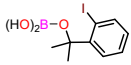 | -612.129471                 | 0.219589                      | 0.162228                    | -612.3333265                | -               |
| <b>INT6</b>                                                                         | -3245.765066                | 1.143900                      | 0.972680                    | -3246.663421                | -               |
| <b>TS4</b>                                                                          | -3245.761880                | 1.143487                      | 0.975661                    | -3246.659529                | -5.7            |
| <b>INT7</b>                                                                         | -3245.773140                | 1.144290                      | 0.974915                    | -3246.67024                 | -               |
| <b>TS5</b>                                                                          | -3245.761285                | 1.144474                      | 0.979344                    | -3246.655524                | -140.3          |
| <b>4a</b>                                                                           | -1435.773089                | 0.494624                      | 0.406169                    | -1436.186253                | -               |

|                       |              |          |          |              |        |
|-----------------------|--------------|----------|----------|--------------|--------|
| <b>TS6</b>            | -3245.737934 | 1.142488 | 0.974544 | -3246.627995 | -233.2 |
| <b>TS7</b>            | -3337.008311 | 0.940662 | 0.788555 | -3337.822386 | -172.3 |
| <b>INT8</b>           | -2199.007293 | 0.864710 | 0.735559 | -2199.572791 | -      |
| TfOB(OH) <sub>2</sub> | -1137.969259 | 0.07577  | 0.024355 | -1138.239638 | -      |
| <b>TS8</b>            | -2972.009904 | 1.059383 | 0.891921 | -2972.810457 | -147.9 |
| <b>INT9</b>           | -2634.524568 | 1.043025 | 0.882398 | -2635.212144 | -      |
| <b>INT6-R</b>         | -3245.765228 | 1.143483 | 0.971803 | -3246.660295 | -      |
| <b>TS4-R</b>          | -3245.763992 | 1.143088 | 0.976794 | -3246.658072 | -55.9  |
| <b>INT7-R</b>         | -3245.773751 | 1.144672 | 0.976855 | -3246.667743 | -      |
| <b>TS5-R</b>          | -3245.761656 | 1.143811 | 0.97672  | -3246.652347 | -122.2 |
| <b>4a-R</b>           | -1435.773089 | 0.494624 | 0.406169 | -1436.186253 | -      |
| <b>TS9</b>            | -1046.855244 | 0.274544 | 0.209509 | -1047.166244 | -540.1 |
| <b>INT10</b>          | -1046.873315 | 0.276352 | 0.212042 | -1047.183157 | -      |
| <b>TS9'</b>           | -1086.160779 | 0.304070 | 0.235529 | -1086.479221 | -545.1 |
| <b>INT10'</b>         | -1086.180098 | 0.305980 | 0.238246 | -1086.497406 | -      |
| <b>INT11</b>          | -3245.770026 | 1.144503 | 0.972746 | -3246.664909 | -      |
| <b>TS10</b>           | -3245.748251 | 1.142097 | 0.973608 | -3246.645489 | -316.7 |
| <b>6a</b>             | -1435.738120 | 0.493092 | 0.400569 | -1436.150899 | -      |
| <b>INT4''</b>         | -991.533340  | 0.258708 | 0.194678 | -991.819476  | -      |
| <b>INT11''</b>        | -3190.412933 | 1.125545 | 0.951581 | -3191.290813 | -      |
| <b>TS10''</b>         | -3190.398820 | 1.123798 | 0.958126 | -3191.277002 | -243.3 |
| <b>6c</b>             | -1380.389664 | 0.474953 | 0.387732 | -1380.778344 | -      |
| <b>TS2'</b>           | -1086.116865 | 0.303262 | 0.228987 | -1086.434878 | -80.6  |
| <b>1b</b>             | -748.596276  | 0.286047 | 0.225354 | -748.810162  | -      |
| <b>INT4'</b>          | -1086.190572 | 0.306243 | 0.234619 | -1086.508776 | -      |
| <b>INT6'</b>          | -3285.060133 | 1.172739 | 0.999177 | -3285.965550 | -      |
| <b>TS4'</b>           | -3285.058037 | 1.171412 | 0.996319 | -3285.963626 | -85.7  |
| <b>INT7'</b>          | -3285.068915 | 1.173372 | 1.002481 | -3285.971897 | -      |
| <b>TS5'</b>           | -3285.053491 | 1.172128 | 1.001814 | -3285.954272 | -192.3 |
| <b>4b</b>             | -1475.058427 | 0.522796 | 0.432412 | -1475.480959 | -      |

|        |              |          |          |              |        |
|--------|--------------|----------|----------|--------------|--------|
| TS2''  | -991.455749  | 0.255927 | 0.188021 | -991.742104  | -38.2  |
| 1c     | -653.935315  | 0.238565 | 0.184056 | -654.117147  | -      |
| INT6'' | -3190.393601 | 1.124933 | 0.951767 | -3191.271756 | -      |
| TS4''  | -3190.392106 | 1.124698 | 0.958629 | -3191.268037 | -66.4  |
| INT7'' | -3190.400676 | 1.125972 | 0.960054 | -3191.276710 | -      |
| TS5''  | -3190.390189 | 1.125375 | 0.960556 | -3191.262585 | -149.1 |
| 4c     | -1380.401126 | 0.475222 | 0.389271 | -1380.794432 | -      |
| INT2'  | -3544.631538 | 0.886469 | 0.724992 | -3545.510785 | -      |
| TS1'   | -3544.628751 | 0.885054 | 0.72249  | -3545.506932 | -91.4  |
| INT3'  | -3207.121146 | 0.868749 | 0.715309 | -3207.890034 | -      |
| INT2'' | -2698.769089 | 0.906221 | 0.751904 | -2699.537096 | -      |
| MeOH   | -115.6914875 | 0.055841 | 0.028761 | -115.7474487 | -      |
| TS1''  | -2698.753053 | 0.905745 | 0.749968 | -2699.525092 | -71.7  |
| INT3'' | -2361.236360 | 0.888814 | 0.743914 | -2361.90604  | -      |

<sup>1</sup>The electronic energy calculated by M06-L in methanol solvent. <sup>2</sup>The thermal correction to enthalpy calculated by M06-L in methanol solvent. <sup>3</sup>The thermal correction to Gibbs free energy calculated by M06-L in methanol solvent. <sup>4</sup>The electronic energy calculated by M06-L in methanol solvent. <sup>5</sup>The M06-L calculated imaginary frequencies for the transition states.

## 8. M06-L geometries for all the optimized compounds and transition states. The S\*\*2 values of radicals.

|      |             |             |             |   |             |             |             |
|------|-------------|-------------|-------------|---|-------------|-------------|-------------|
| INT1 |             |             |             | H | -6.80291100 | 2.76266300  | -0.99805800 |
| C    | -3.15160200 | -0.75496000 | 1.71092300  | H | -8.54482700 | 1.01367000  | -0.70584000 |
| C    | -2.64687500 | 0.03544700  | 0.49731900  | C | 0.19903500  | -2.14054600 | 1.45674900  |
| C    | -1.02865200 | -1.29722900 | 1.24098800  | C | -0.24349900 | -3.63339000 | 1.38086400  |
| H    | -4.03460900 | -1.36947500 | 1.50027100  | H | -0.83087200 | -3.84571000 | 2.28164200  |
| H    | -2.72107200 | 1.11847300  | 0.64344100  | H | 0.66600400  | -4.24406800 | 1.43206000  |
| H    | -3.34279000 | -0.14142300 | 2.59783900  | C | 0.79131900  | -1.85359800 | 2.87997600  |
| O    | -2.05870700 | -1.65524600 | 2.03628000  | H | -0.05595400 | -1.78392300 | 3.57444600  |
| N    | -1.22478300 | -0.33300700 | 0.42093900  | H | 1.37790500  | -2.73349600 | 3.17195500  |
| C    | -3.32480700 | -0.33734900 | -0.82421600 | C | -1.04991700 | -3.95092100 | 0.15058000  |
| H    | -2.78613700 | 0.19256700  | -1.61961400 | C | -2.43085600 | -4.15349600 | 0.24018300  |
| H    | -3.19023000 | -1.41735300 | -0.99147800 | C | -0.44938000 | -4.00131900 | -1.11273000 |
| C    | -4.78064000 | 0.02725500  | -0.82522700 | C | -3.19314500 | -4.39728700 | -0.89952200 |
| C    | -5.76909400 | -0.94760500 | -0.66301300 | H | -2.90824200 | -4.11571500 | 1.21925700  |
| C    | -5.16867700 | 1.36773000  | -0.94150100 | C | -1.21004300 | -4.23341900 | -2.25475100 |
| C    | -7.11728900 | -0.59841600 | -0.61991500 | H | 0.63033300  | -3.87190700 | -1.20136900 |
| H    | -5.47232800 | -1.99566000 | -0.58410200 | C | -2.58549200 | -4.42954900 | -2.15206300 |
| C    | -6.51437300 | 1.71751000  | -0.89862800 | H | -4.26540100 | -4.56406200 | -0.80814500 |
| H    | -4.40109000 | 2.13032900  | -1.07871200 | H | -0.72570100 | -4.26777000 | -3.22885500 |
| C    | -7.49233700 | 0.73695500  | -0.73633000 | H | -3.17975500 | -4.61267400 | -3.04502400 |
| H    | -7.87511000 | -1.37117100 | -0.49950800 | C | 1.66161700  | -0.62717600 | 2.92128200  |
|      |             |             |             | C | 3.04599100  | -0.75961400 | 3.06756600  |

|    |             |             |             |
|----|-------------|-------------|-------------|
| C  | 1.13102300  | 0.65320100  | 2.72082200  |
| C  | 3.88012600  | 0.35536900  | 3.02538700  |
| H  | 3.47037400  | -1.75355900 | 3.21520500  |
| C  | 1.96315400  | 1.76811400  | 2.65570000  |
| H  | 0.05486100  | 0.78543400  | 2.61172200  |
| C  | 3.34063000  | 1.62178700  | 2.80987900  |
| H  | 4.95416300  | 0.23295600  | 3.16058500  |
| H  | 1.53134900  | 2.75062000  | 2.47952100  |
| H  | 3.99029700  | 2.49362900  | 2.76155700  |
| C  | 3.42185900  | -2.20348200 | -0.19876700 |
| C  | 2.77400000  | -1.05572700 | -0.98536000 |
| C  | 1.30753900  | -1.88250200 | 0.47192100  |
| H  | 4.21594900  | -1.85911200 | 0.47788400  |
| H  | 2.65495300  | -1.31619900 | -2.04795300 |
| H  | 3.80371100  | -3.02324400 | -0.81272400 |
| O  | 2.34950800  | -2.73009600 | 0.62216600  |
| N  | 1.43343400  | -0.94378800 | -0.39177800 |
| C  | 3.51491500  | 0.27634700  | -0.86998200 |
| H  | 2.93628100  | 1.03892500  | -1.41117100 |
| H  | 3.51208400  | 0.57490900  | 0.18865200  |
| C  | 4.92166500  | 0.18053700  | -1.38748900 |
| C  | 6.00617000  | 0.13745600  | -0.50640600 |
| C  | 5.17394400  | 0.08420200  | -2.76082900 |
| C  | 7.30898400  | 0.00307200  | -0.98070100 |
| H  | 5.81888800  | 0.22613000  | 0.56539600  |
| C  | 6.47323000  | -0.05018300 | -3.23866700 |
| H  | 4.33969800  | 0.13095100  | -3.46214200 |
| C  | 7.54532300  | -0.09332800 | -2.34899900 |
| H  | 8.14137000  | -0.02135700 | -0.27935200 |
| H  | 6.65149300  | -0.11476800 | -4.31068100 |
| H  | 8.56239000  | -0.19485800 | -2.72295200 |
| Cu | 0.23825100  | 0.67725600  | -0.52791700 |
| S  | -0.73648300 | 3.35878900  | -1.14281800 |
| O  | -1.96294900 | 2.55771300  | -1.26880400 |
| O  | -0.59899500 | 4.57150100  | -1.93204500 |
| O  | 0.51998100  | 2.50733900  | -1.12677400 |
| C  | -0.79124400 | 3.93271100  | 0.60941300  |
| F  | -0.92691600 | 2.87242900  | 1.44348800  |
| F  | -1.82942700 | 4.74540300  | 0.81230000  |
| F  | 0.33106900  | 4.57477900  | 0.95126500  |

### 3a

|   |             |             |             |
|---|-------------|-------------|-------------|
| C | 2.27360400  | -0.96890700 | 0.09264200  |
| C | 0.51470100  | 0.81684600  | -0.12629500 |
| C | 0.01051900  | 2.10282600  | -0.20023100 |
| C | 0.92273200  | 3.15595200  | -0.13812800 |
| C | 2.28173800  | 2.89373900  | 0.00801100  |
| C | 2.74164000  | 1.58260400  | 0.08039200  |
| C | 1.85411200  | 0.50531300  | 0.00098700  |
| H | -1.04824600 | 2.30411100  | -0.31914100 |
| H | 0.56066100  | 4.17940900  | -0.20956300 |
| H | 2.99074100  | 3.71763300  | 0.06115000  |
| H | 3.80692500  | 1.38711400  | 0.19707100  |
| I | -0.71508900 | -0.97396200 | -0.18702300 |
| O | 1.30800100  | -1.75922800 | -0.52201000 |
| C | 3.58392200  | -1.21358400 | -0.65453700 |
| H | 4.42982600  | -0.68249500 | -0.20056500 |
| H | 3.80604400  | -2.28527400 | -0.63233800 |
| H | 3.49124900  | -0.90586300 | -1.70109300 |
| C | 2.43352500  | -1.32841500 | 1.57898400  |
| H | 2.70467900  | -2.38642200 | 1.66850700  |
| H | 3.20606000  | -0.72371200 | 2.07184100  |
| H | 1.49246100  | -1.17388400 | 2.12274200  |

|   |             |             |             |
|---|-------------|-------------|-------------|
| C | -2.61362700 | 0.32791000  | 0.15525800  |
| F | -3.61592100 | -0.55286800 | 0.33791900  |
| F | -2.94972100 | 1.11135900  | -0.88908800 |
| F | -2.54790200 | 1.11011800  | 1.24530000  |

### -OTf

|   |             |             |             |
|---|-------------|-------------|-------------|
| S | -0.92002800 | 0.00001100  | -0.00002900 |
| O | -1.22827300 | -0.61092300 | 1.30469300  |
| O | -1.22890100 | 1.43529200  | -0.12324200 |
| O | -1.22726800 | -0.82460100 | -1.18165500 |
| C | 0.92551600  | 0.00008100  | 0.00025100  |
| F | 1.43123300  | 0.53351000  | -1.13272900 |
| F | 1.43067500  | -1.24847300 | 0.10497400  |
| F | 1.43174500  | 0.71509600  | 1.02782000  |

### INT2

|   |             |             |             |
|---|-------------|-------------|-------------|
| C | -1.49355900 | -3.40056200 | 1.80454400  |
| C | -1.59710300 | -2.26851900 | 0.76814700  |
| C | 0.53670100  | -2.59902000 | 1.29288000  |
| H | -1.80714000 | -4.37553700 | 1.41075200  |
| H | -2.14820400 | -1.40364500 | 1.17026800  |
| H | -2.01420500 | -3.21165300 | 2.74705600  |
| O | -0.07283200 | -3.48951300 | 2.10142800  |
| N | -0.20573600 | -1.86517600 | 0.55790500  |
| C | -2.22381000 | -2.67064600 | -0.56752800 |
| H | -2.00059600 | -1.86104700 | -1.27626200 |
| H | -1.71100400 | -3.57176700 | -0.93517800 |
| C | -3.70485400 | -2.88484500 | -0.45960900 |
| C | -4.25370500 | -4.16654600 | -0.37481800 |
| C | -4.56245900 | -1.78046000 | -0.39627800 |
| C | -5.62777700 | -4.34395800 | -0.22919100 |
| H | -3.59565600 | -5.03505400 | -0.44005000 |
| C | -5.93479800 | -1.95346000 | -0.25165700 |
| H | -4.13914300 | -0.77544800 | -0.47409800 |
| C | -6.47035500 | -3.23772000 | -0.16578700 |
| H | -6.04142600 | -5.34881000 | -0.17105900 |
| H | -6.59109000 | -1.08600300 | -0.21186300 |
| H | -7.54400900 | -3.37492300 | -0.05591900 |
| C | 2.03569700  | -2.61542200 | 1.39963200  |
| C | 2.51073800  | -4.08135700 | 1.14874900  |
| H | 2.18229800  | -4.67943800 | 2.00628000  |
| H | 3.60691000  | -4.08017600 | 1.15104700  |
| C | 2.43111400  | -2.16956800 | 2.84445300  |
| H | 1.90541400  | -2.83477000 | 3.53998600  |
| H | 3.50534400  | -2.35093000 | 2.96414600  |
| C | 1.95641100  | -4.64838000 | -0.12991900 |
| C | 0.85127500  | -5.50569500 | -0.10485400 |
| C | 2.48581900  | -4.27735200 | -1.37087000 |
| C | 0.28031700  | -5.96883800 | -1.28757500 |
| H | 0.44425100  | -5.81743600 | 0.85694200  |
| C | 1.91474700  | -4.73434200 | -2.55508200 |
| H | 3.36921600  | -3.63753100 | -1.40871000 |
| C | 0.80500000  | -5.57616300 | -2.51661600 |
| H | -0.57165400 | -6.64599900 | -1.24854800 |
| H | 2.34587600  | -4.44445500 | -3.51146000 |
| H | 0.36246700  | -5.93880800 | -3.44196800 |
| C | 2.09821200  | -0.72780800 | 3.11165600  |
| C | 3.07242600  | 0.26666700  | 2.97344800  |
| C | 0.79451500  | -0.34261000 | 3.44567300  |
| C | 2.75430000  | 1.61031600  | 3.15577300  |
| H | 4.09680900  | -0.02264500 | 2.73248900  |
| C | 0.47250100  | 0.99998000  | 3.62923400  |
| H | 0.02977800  | -1.10814100 | 3.58722700  |



|            |                    |             |             |   |             |             |             |
|------------|--------------------|-------------|-------------|---|-------------|-------------|-------------|
| C          | 1.45134700         | 1.98252500  | 3.47715700  | H | -3.38588900 | 1.70190600  | -1.34219100 |
| H          | 3.52915100         | 2.36934300  | 3.06038800  | H | -4.67796400 | 0.62393500  | -0.82203100 |
| H          | -0.53784100        | 1.27800600  | 3.92815500  | C | -5.06950400 | 2.70652000  | -0.44283100 |
| H          | 1.20563800         | 3.03014000  | 3.63626000  | C | -6.44338000 | 2.50462900  | -0.28183600 |
| C          | 4.65055100         | -0.83197700 | -0.39697600 | C | -4.58158400 | 4.01758300  | -0.45450300 |
| C          | 3.43522500         | -0.12514100 | -1.00716200 | C | -7.31115800 | 3.58454800  | -0.13714900 |
| C          | 2.74512600         | -1.69348500 | 0.43611100  | H | -6.83445200 | 1.48533000  | -0.28735500 |
| H          | 5.32126300         | -0.16222300 | 0.15256700  | C | -5.44480100 | 5.09872700  | -0.31130700 |
| H          | 3.40505300         | -0.24937300 | -2.09855100 | H | -3.51264800 | 4.19060500  | -0.59117600 |
| H          | 5.23854300         | -1.41512300 | -1.11165200 | C | -6.81246900 | 4.88406000  | -0.15019300 |
| O          | 4.08086000         | -1.76463000 | 0.55727700  | H | -8.37888800 | 3.41039300  | -0.01989400 |
| N          | 2.28957900         | -0.85078000 | -0.42651800 | H | -5.05120400 | 6.11310900  | -0.33042500 |
| C          | 3.33298000         | 1.36362900  | -0.66451300 | H | -7.48829600 | 5.72950800  | -0.04098300 |
| H          | 2.36555300         | 1.72374900  | -1.04970700 | C | -2.65156500 | -2.33866200 | 1.18124600  |
| H          | 3.28519700         | 1.45953500  | 0.43007000  | C | -3.93233700 | -3.15282600 | 0.82462100  |
| C          | 4.47723300         | 2.15925300  | -1.22198100 | H | -4.59819000 | -3.10501300 | 1.69373900  |
| C          | 5.53005400         | 2.56954600  | -0.39884000 | H | -3.62720600 | -4.19964900 | 0.70837100  |
| C          | 4.53481100         | 2.46528600  | -2.58609200 | C | -2.15024500 | -2.75822700 | 2.60562400  |
| C          | 6.61436600         | 3.26983700  | -0.92200600 | H | -2.85821700 | -2.34125500 | 3.33300400  |
| H          | 5.49061600         | 2.34666500  | 0.66956500  | H | -2.22996600 | -3.85024100 | 2.66622300  |
| C          | 5.61546700         | 3.16503700  | -3.11248000 | C | -4.64364700 | -2.64574000 | -0.40197600 |
| H          | 3.71563000         | 2.15959600  | -3.23979800 | C | -5.87105900 | -1.98519700 | -0.28542500 |
| C          | 6.65911500         | 3.56770200  | -2.28094800 | C | -4.08242200 | -2.79232100 | -1.67629600 |
| H          | 7.42262000         | 3.58680000  | -0.26605900 | C | -6.52290300 | -1.48625200 | -1.41117600 |
| H          | 5.64243500         | 3.40168800  | -4.17428800 | H | -6.32129000 | -1.87108400 | 0.70092500  |
| H          | 7.50322200         | 4.11711200  | -2.69204600 | C | -4.72430000 | -2.28199400 | -2.80081700 |
| Cu         | 0.45347900         | -0.32952300 | -0.71400500 | H | -3.14487700 | -3.33779200 | -1.79479800 |
| C          | -1.36259900        | 1.29159300  | -2.35439900 | C | -5.94615900 | -1.62491500 | -2.67111800 |
| C          | -2.78048100        | 2.82677100  | -0.90786900 | H | -7.48858700 | -0.99504100 | -1.30445500 |
| C          | -3.80154700        | 3.72442400  | -0.64683000 | H | -4.27758800 | -2.41247400 | -3.78450400 |
| C          | -4.60940400        | 4.11219800  | -1.71467100 | H | -6.45329900 | -1.23547500 | -3.55118100 |
| C          | -4.37206600        | 3.60382700  | -2.98701100 | C | -0.73634200 | -2.32715900 | 2.87924900  |
| C          | -3.33968300        | 2.69741100  | -3.19922000 | C | 0.29531300  | -3.27109400 | 2.87685000  |
| C          | -2.51424000        | 2.27459600  | -2.15118600 | C | -0.40653000 | -0.97683700 | 3.05625100  |
| H          | -3.99597600        | 4.11333600  | 0.34594300  | C | 1.62129600  | -2.88221100 | 3.05655200  |
| H          | -5.42532700        | 4.80841600  | -1.53647600 | H | 0.04950200  | -4.32565500 | 2.74701400  |
| H          | -5.00018200        | 3.90857400  | -3.82062400 | C | 0.91985400  | -0.58099900 | 3.21097900  |
| H          | -3.16703200        | 2.30194000  | -4.19836600 | H | -1.19611700 | -0.22465400 | 3.09404700  |
| I          | -1.42978700        | 2.15322900  | 0.66235000  | C | 1.93722900  | -1.53459700 | 3.21299800  |
| O          | -1.15807100        | 0.63262400  | -1.11693700 | H | 2.40752600  | -3.63499600 | 3.08208800  |
| C          | -1.70954600        | 0.21632600  | -3.37987800 | H | 1.15713300  | 0.47355100  | 3.34093000  |
| H          | -1.80012100        | 0.61966800  | -4.39472200 | H | 2.97171300  | -1.22753100 | 3.35862700  |
| H          | -0.90482700        | -0.52940300 | -3.39218500 | C | -0.09335200 | -4.10060300 | -0.70898900 |
| H          | -2.64517100        | -0.29038000 | -3.11837900 | C | 0.24667700  | -2.66267700 | -1.12067800 |
| C          | -0.11130300        | 2.05872600  | -2.78792600 | C | -1.54313700 | -2.66218000 | 0.21937900  |
| H          | 0.71928600         | 1.34924100  | -2.91622400 | H | 0.66440200  | -4.55194300 | -0.05598900 |
| H          | -0.26434600        | 2.59179800  | -3.73401300 | H | 0.08527200  | -2.50530300 | -2.19801600 |
| H          | 0.18562700         | 2.79642500  | -2.03048000 | H | -0.30457500 | -4.77876200 | -1.53846600 |
| C          | -2.07204000        | 3.85511300  | 2.07889700  | O | -1.31573500 | -3.97339100 | 0.07140600  |
| F          | -1.23691800        | 3.80435300  | 3.12105900  | N | -0.74735100 | -1.85901100 | -0.39016200 |
| F          | -3.31895800        | 3.68830100  | 2.52516500  | C | 1.65373300  | -2.20318600 | -0.75052400 |
| F          | -1.97304400        | 5.04581300  | 1.49686500  | H | 1.71512600  | -1.12896900 | -0.98498700 |
|            |                    |             |             | H | 1.76427200  | -2.29059000 | 0.34156000  |
|            |                    |             |             | C | 2.72914700  | -2.97052900 | -1.46271400 |
|            |                    |             |             | C | 3.44983100  | -3.97119300 | -0.80485300 |
|            |                    |             |             | C | 3.00356900  | -2.72060000 | -2.81194500 |
|            |                    |             |             | C | 4.42182300  | -4.70798600 | -1.47753500 |
|            |                    |             |             | H | 3.25304000  | -4.16380000 | 0.25150500  |
|            |                    |             |             | C | 3.97390000  | -3.45397900 | -3.48656000 |
|            |                    |             |             | H | 2.45453700  | -1.93487500 | -3.33461600 |
|            |                    |             |             | C | 4.68422900  | -4.45117200 | -2.82021100 |
|            |                    |             |             | H | 4.97817800  | -5.48044000 | -0.95043200 |
|            |                    |             |             | H | 4.18106400  | -3.24434200 | -4.53403500 |
| <b>TS1</b> | <b>S**2 = 1.04</b> |             |             |   |             |             |             |
| C          | -4.29896400        | 0.81836300  | 1.89945300  |   |             |             |             |
| C          | -3.38273400        | 1.27271400  | 0.76178800  |   |             |             |             |
| C          | -3.03216900        | -0.88365900 | 1.18898200  |   |             |             |             |
| H          | -5.36109700        | 1.00899100  | 1.71830300  |   |             |             |             |
| H          | -2.78520800        | 2.14948800  | 1.04254300  |   |             |             |             |
| H          | -4.02026000        | 1.20702900  | 2.88490700  |   |             |             |             |
| O          | -4.11130900        | -0.62385300 | 1.93761700  |   |             |             |             |
| N          | -2.49073900        | 0.11164400  | 0.57840100  |   |             |             |             |
| C          | -4.13095800        | 1.53936600  | -0.55101300 |   |             |             |             |

|    |             |             |             |
|----|-------------|-------------|-------------|
| H  | 5.44517900  | -5.02319600 | -3.34662900 |
| Cu | -0.55246600 | 0.08693500  | -0.01240400 |
| C  | 0.82837000  | 2.31118400  | -1.05610500 |
| C  | 3.11280600  | 2.96831200  | -0.08002400 |
| C  | 4.12656300  | 3.87449300  | 0.20536800  |
| C  | 3.99536500  | 5.19428700  | -0.21638400 |
| C  | 2.85687200  | 5.57940300  | -0.91168800 |
| C  | 1.85214100  | 4.65321100  | -1.16886000 |
| C  | 1.94073600  | 3.31846200  | -0.75307800 |
| H  | 5.00872100  | 3.56801100  | 0.75951300  |
| H  | 4.78387300  | 5.90932400  | 0.00599300  |
| H  | 2.74111700  | 6.60644000  | -1.24997700 |
| H  | 0.96455200  | 4.98059500  | -1.70474000 |
| I  | 3.41800100  | 0.94977700  | 0.58779600  |
| O  | 0.67187900  | 1.47162100  | 0.06940800  |
| C  | -0.51746500 | 3.00247700  | -1.29230900 |
| H  | -0.52926100 | 3.61318900  | -2.20191400 |
| H  | -1.28533400 | 2.22617700  | -1.41324800 |
| H  | -0.79052600 | 3.63041200  | -0.43674800 |
| C  | 1.19832700  | 1.49875600  | -2.30410200 |
| H  | 0.41622700  | 0.74846300  | -2.49977800 |
| H  | 1.29172400  | 2.13581800  | -3.19193300 |
| H  | 2.15019200  | 0.97092100  | -2.16661800 |
| C  | 6.23669900  | 1.23762000  | 0.36431200  |
| F  | 6.69309100  | 0.00096100  | 0.38080300  |
| F  | 6.72285400  | 1.93681500  | 1.37820000  |
| F  | 6.49085800  | 1.83218300  | -0.78561300 |

**INT3** S\*\*2 = 0.75

|   |             |             |             |
|---|-------------|-------------|-------------|
| C | 0.94747100  | -3.87417400 | -0.71106900 |
| C | 1.10108100  | -2.39338200 | -1.08191000 |
| C | -0.69565700 | -2.67197400 | 0.23288000  |
| H | 1.75290400  | -4.24275500 | -0.06445400 |
| H | 0.93844000  | -2.23134300 | -2.15799200 |
| H | 0.82709000  | -4.55024000 | -1.56002800 |
| O | -0.28629200 | -3.92977200 | 0.06477700  |
| N | -0.01074000 | -1.75469500 | -0.35385300 |
| C | 2.42853900  | -1.76486300 | -0.66938200 |
| H | 2.37088900  | -0.68761000 | -0.88706700 |
| H | 2.52577900  | -1.85462200 | 0.42324900  |
| C | 3.60281700  | -2.38855000 | -1.36634900 |
| C | 4.40318700  | -3.33026600 | -0.71356600 |
| C | 3.89282100  | -2.06528400 | -2.69630700 |
| C | 5.46809800  | -3.93924500 | -1.37310500 |
| H | 4.19707500  | -3.57435300 | 0.33031500  |
| C | 4.95624100  | -2.67062000 | -3.35757000 |
| H | 3.28415700  | -1.32051800 | -3.21282200 |
| C | 5.74479500  | -3.61135800 | -2.69730300 |
| H | 6.08659900  | -4.66530200 | -0.84939800 |
| H | 5.17574800  | -2.40298500 | -4.38914800 |
| H | 6.57896700  | -4.08182300 | -3.21320100 |
| C | -1.85046000 | -2.51905200 | 1.18209000  |
| C | -1.31008300 | -2.86220500 | 2.61417500  |
| H | -1.24048500 | -3.95487100 | 2.67579600  |
| H | -2.07820800 | -2.54697600 | 3.33194100  |
| C | -2.99597800 | -3.50687700 | 0.80484600  |
| H | -2.54219600 | -4.49919700 | 0.69682400  |
| H | -3.67643700 | -3.55516900 | 1.66247400  |
| C | 0.02851200  | -2.24075200 | 2.89988400  |
| C | 1.17695100  | -3.03748000 | 2.92106200  |
| C | 0.17204000  | -0.85562500 | 3.06203400  |
| C | 2.43645800  | -2.47052800 | 3.10805100  |
| H | 1.07692200  | -4.11726500 | 2.80389200  |

|    |             |             |             |
|----|-------------|-------------|-------------|
| C  | 1.43182700  | -0.28230200 | 3.21821500  |
| H  | -0.71258600 | -0.21673700 | 3.09021900  |
| C  | 2.56766400  | -1.09073900 | 3.24265100  |
| H  | 3.31658000  | -3.10990100 | 3.15180600  |
| H  | 1.52712600  | 0.79614100  | 3.32992300  |
| H  | 3.54979300  | -0.64317200 | 3.38158200  |
| C  | -3.74937300 | -3.10563200 | -0.43612000 |
| C  | -5.05712900 | -2.61760200 | -0.34392700 |
| C  | -3.15233600 | -3.18123700 | -1.70047300 |
| C  | -5.75196300 | -2.21901800 | -1.48393000 |
| H  | -5.53597300 | -2.56193500 | 0.63394500  |
| C  | -3.83890700 | -2.76960400 | -2.83902300 |
| H  | -2.14876500 | -3.59733200 | -1.80115300 |
| C  | -5.14092300 | -2.28482400 | -2.73366900 |
| H  | -6.77785000 | -1.86535400 | -1.39659300 |
| H  | -3.36289700 | -2.84484800 | -3.81464600 |
| H  | -5.68220800 | -1.97440200 | -3.62464700 |
| C  | -3.94237600 | 0.37642000  | 1.85685300  |
| C  | -3.07185500 | 0.96000600  | 0.74321000  |
| C  | -2.43548000 | -1.13528000 | 1.18403500  |
| H  | -5.01568600 | 0.41906400  | 1.65005900  |
| H  | -2.61243300 | 1.91113600  | 1.04032900  |
| H  | -3.74177700 | 0.79068600  | 2.85040300  |
| O  | -3.55834800 | -1.02877200 | 1.89504500  |
| N  | -2.02081800 | -0.06728900 | 0.59280100  |
| C  | -3.81245200 | 1.11873500  | -0.59096600 |
| H  | -3.07873100 | 1.40271000  | -1.35825400 |
| H  | -4.20324500 | 0.13217200  | -0.88270200 |
| C  | -4.92353800 | 2.12545300  | -0.50413600 |
| C  | -6.25283800 | 1.70915600  | -0.38591000 |
| C  | -4.64579000 | 3.49639400  | -0.49148100 |
| C  | -7.28241500 | 2.63868000  | -0.25958700 |
| H  | -6.47904800 | 0.64132400  | -0.41069000 |
| C  | -5.67127700 | 4.42772700  | -0.36615000 |
| H  | -3.61394400 | 3.83650400  | -0.59517800 |
| C  | -6.99249000 | 4.00011300  | -0.24780600 |
| H  | -8.31272400 | 2.29888000  | -0.17610500 |
| H  | -5.44076800 | 5.49116100  | -0.36585600 |
| H  | -7.79494800 | 4.72829000  | -0.15248800 |
| Cu | -0.13371900 | 0.17303000  | 0.01784400  |
| C  | 0.98701900  | 2.59012700  | -0.99276100 |
| C  | 3.16471500  | 3.52080900  | 0.04688300  |
| C  | 4.00764700  | 4.58041500  | 0.37419700  |
| C  | 3.64010800  | 5.88661600  | 0.06988400  |
| C  | 2.42856100  | 6.12274700  | -0.56477900 |
| C  | 1.59762800  | 5.05513100  | -0.88239500 |
| C  | 1.92963300  | 3.72527900  | -0.58608800 |
| H  | 4.95623600  | 4.38513100  | 0.86715200  |
| H  | 4.30489700  | 6.70732700  | 0.32961000  |
| H  | 2.12295900  | 7.13617000  | -0.81448100 |
| H  | 0.65306900  | 5.26808600  | -1.37594700 |
| I  | 3.93079100  | 1.58702400  | 0.57286700  |
| O  | 0.86189600  | 1.68509700  | 0.08834200  |
| C  | -0.43111000 | 3.08439600  | -1.30361500 |
| H  | -0.46425500 | 3.72098900  | -2.19385600 |
| H  | -1.06495400 | 2.21025800  | -1.50542200 |
| H  | -0.85234100 | 3.63543600  | -0.45534000 |
| C  | 1.52973700  | 1.86431400  | -2.23097600 |
| H  | 0.86417000  | 1.02694100  | -2.49272700 |
| H  | 1.58335000  | 2.54179500  | -3.09092900 |
| H  | 2.53379900  | 1.46552500  | -2.04935500 |

**CF3** S\*\*2 = 0.75

|   |             |             |             |
|---|-------------|-------------|-------------|
| C | -0.00024500 | 0.00000100  | 0.33568600  |
| F | 0.58248400  | -1.11729000 | -0.07461500 |
| F | 0.67697000  | 1.06276800  | -0.07459800 |
| F | -1.25929100 | 0.05452100  | -0.07457800 |

**TS2** S\*\*2 = 0.75

|   |             |             |             |
|---|-------------|-------------|-------------|
| C | 1.90503800  | -0.90258400 | 1.72079900  |
| H | 1.53526500  | -1.82392900 | 2.16327600  |
| H | 2.96587900  | -0.67559500 | 1.80413700  |
| C | 1.03546000  | -0.03526800 | 1.16822600  |
| C | 1.48042800  | 1.24238500  | 0.57627000  |
| C | 2.63872900  | 1.28993000  | -0.21459700 |
| C | 0.78784400  | 2.44279200  | 0.81041100  |
| C | 3.09055900  | 2.49083300  | -0.74876600 |
| H | 3.17496300  | 0.36599000  | -0.42308300 |
| C | 1.24240800  | 3.64390500  | 0.27539000  |
| H | -0.10026200 | 2.43455200  | 1.44193700  |
| C | 2.39377500  | 3.67257000  | -0.50785000 |
| H | 3.98722400  | 2.50169500  | -1.36574500 |
| H | 0.69697100  | 4.56357900  | 0.47964200  |
| H | 2.74600900  | 4.61221400  | -0.92900600 |
| C | -0.39973000 | -0.48515700 | 1.12788700  |
| O | -0.80147500 | -1.42819100 | 1.79894100  |
| N | -1.18567100 | 0.21247700  | 0.24022400  |
| H | -0.72085200 | 0.93878500  | -0.29075300 |
| C | -2.55317100 | 0.06545000  | -0.03314900 |
| C | -3.11679700 | 0.97368800  | -0.94059800 |
| C | -3.36217400 | -0.91752000 | 0.55143600  |
| C | -4.46519300 | 0.90609500  | -1.26027400 |
| H | -2.48562500 | 1.73951300  | -1.39332100 |
| C | -4.71234600 | -0.96960700 | 0.21945600  |
| H | -2.92820600 | -1.61928600 | 1.25274000  |
| C | -5.27447600 | -0.06798300 | -0.68033200 |
| H | -4.88384600 | 1.62070200  | -1.96650600 |
| H | -5.33417600 | -1.73630700 | 0.67878800  |
| H | -6.33245900 | -0.12321800 | -0.92808400 |
| C | 2.29353400  | -2.42247600 | -0.55693000 |
| F | 2.16505200  | -3.73678400 | -0.65053800 |
| F | 3.54793400  | -2.05936200 | -0.82151900 |
| F | 1.45226500  | -1.80638900 | -1.37698800 |

**1a**

|   |             |             |             |
|---|-------------|-------------|-------------|
| C | 1.92437400  | 2.73921100  | -0.17174100 |
| H | 1.28444500  | 3.61725800  | -0.19643400 |
| H | 2.99895000  | 2.87582200  | -0.27062400 |
| C | 1.38314600  | 1.52496800  | 0.00556800  |
| C | 2.21656200  | 0.30356600  | 0.03740500  |
| C | 2.04899600  | -0.67452700 | 1.03132000  |
| C | 3.23121100  | 0.11725600  | -0.91242200 |
| C | 2.87560300  | -1.79287300 | 1.07593800  |
| H | 1.27806600  | -0.53990800 | 1.78994500  |
| C | 4.05491700  | -1.00163900 | -0.86855400 |
| H | 3.35758200  | 0.86084800  | -1.69853900 |
| C | 3.88016300  | -1.96132100 | 0.12602700  |
| H | 2.73738800  | -2.53293700 | 1.86215500  |
| H | 4.83270300  | -1.12927500 | -1.61934500 |
| H | 4.52273000  | -2.83903100 | 0.15917000  |
| C | -0.11603300 | 1.47822200  | 0.13904000  |
| O | -0.77840500 | 2.48403500  | 0.35925000  |
| N | -0.66267800 | 0.23016000  | -0.05920800 |
| H | -0.00973100 | -0.51358700 | -0.27431000 |
| C | -2.01370400 | -0.14685900 | -0.07793700 |
| C | -2.29402400 | -1.49192400 | -0.35712800 |

|   |             |             |             |
|---|-------------|-------------|-------------|
| C | -3.07031600 | 0.74106900  | 0.16427900  |
| C | -3.60507100 | -1.94492800 | -0.40008400 |
| H | -1.47143100 | -2.18370900 | -0.54323100 |
| C | -4.37810300 | 0.26895200  | 0.11674200  |
| H | -2.85577300 | 1.78023600  | 0.38048500  |
| C | -4.65889900 | -1.06527500 | -0.16402400 |
| H | -3.80158100 | -2.99271400 | -0.62037700 |
| H | -5.19240000 | 0.96730900  | 0.30332800  |
| H | -5.68790100 | -1.41709800 | -0.19834900 |

**INT4** S\*\*2 = 0.75

|   |             |             |             |
|---|-------------|-------------|-------------|
| C | -1.84003200 | -1.34498600 | -0.94943700 |
| H | -1.26635300 | -2.21753700 | -1.27377700 |
| H | -2.45117100 | -1.00287100 | -1.79401700 |
| C | -0.89906500 | -0.28985800 | -0.46024800 |
| C | -1.35066800 | 1.05116200  | -0.19011900 |
| C | -0.69256700 | 1.89753500  | 0.74050200  |
| C | -2.50588100 | 1.57513300  | -0.82329700 |
| C | -1.14169300 | 3.18527500  | 0.98763700  |
| H | 0.14659100  | 1.50897600  | 1.31325500  |
| C | -2.94162500 | 2.86592100  | -0.57861700 |
| H | -3.05732700 | 0.95752000  | -1.52844800 |
| C | -2.26100400 | 3.68557000  | 0.32317300  |
| H | -0.62342600 | 3.79935500  | 1.72201100  |
| H | -3.82432600 | 3.23918500  | -1.09465700 |
| H | -2.61029100 | 4.69751600  | 0.51794200  |
| C | 0.47270900  | -0.78600400 | -0.22644100 |
| O | 0.69408500  | -1.98255100 | -0.04307000 |
| N | 1.47249600  | 0.16641500  | -0.30001300 |
| H | 1.18206100  | 1.09469600  | -0.58066500 |
| C | 2.85490800  | -0.00251700 | -0.15564100 |
| C | 3.66472800  | 1.11053900  | -0.42743500 |
| C | 3.45037900  | -1.20414900 | 0.25439200  |
| C | 5.04340500  | 1.02780100  | -0.29733100 |
| H | 3.20162000  | 2.04562600  | -0.74529900 |
| C | 4.83400000  | -1.26745500 | 0.37935900  |
| H | 2.82838800  | -2.06603800 | 0.46183900  |
| C | 5.63945600  | -0.16480600 | 0.10715400  |
| H | 5.65375700  | 1.90223000  | -0.51551400 |
| H | 5.28707900  | -2.20465100 | 0.69834800  |
| H | 6.72041300  | -0.23251700 | 0.20935500  |
| C | -2.79953600 | -1.83408400 | 0.11479000  |
| F | -3.55651900 | -2.84478300 | -0.35929900 |
| F | -3.64385700 | -0.86012400 | 0.51816400  |
| F | -2.15654100 | -2.27914400 | 1.20376100  |

**TS3** S\*\*2 = 0.75

|   |             |             |             |
|---|-------------|-------------|-------------|
| C | -3.85668900 | -0.63886600 | 1.87686000  |
| C | -2.87447400 | -0.89680000 | 0.72952700  |
| C | -1.99510600 | 0.58352600  | 2.16597700  |
| H | -4.12950600 | -1.53894200 | 2.43693000  |
| H | -3.31170600 | -0.63410400 | -0.24461900 |
| H | -4.76813300 | -0.11193200 | 1.57638000  |
| O | -3.13083900 | 0.23786400  | 2.78070500  |
| N | -1.77743700 | 0.04867900  | 1.01424600  |
| C | -2.33491800 | -2.33128900 | 0.68597300  |
| H | -1.68391600 | -2.41733200 | -0.19569800 |
| H | -1.69400000 | -2.49152000 | 1.56564800  |
| C | -3.43962700 | -3.34880900 | 0.64440900  |
| C | -3.67309500 | -4.20013100 | 1.72764700  |
| C | -4.29448900 | -3.41871700 | -0.46051200 |
| C | -4.72928400 | -5.10844300 | 1.70508100  |
| H | -3.01276200 | -4.15512700 | 2.59585000  |

|    |             |             |             |
|----|-------------|-------------|-------------|
| C  | -5.35310400 | -4.32025700 | -0.48460800 |
| H  | -4.11978400 | -2.75707500 | -1.31022600 |
| C  | -5.57258000 | -5.16877000 | 0.59923100  |
| H  | -4.89285500 | -5.76955100 | 2.55363600  |
| H  | -6.00837100 | -4.36417000 | -1.35299900 |
| H  | -6.39845300 | -5.87651400 | 0.58037700  |
| C  | -1.17082100 | 1.55145100  | 2.96922000  |
| C  | -0.81734500 | 0.88912400  | 4.33804300  |
| H  | -1.76489700 | 0.64133300  | 4.83049400  |
| H  | -0.32730000 | 1.65950300  | 4.94464800  |
| C  | -2.03375300 | 2.82813900  | 3.23202200  |
| H  | -2.91235100 | 2.50651300  | 3.80309700  |
| H  | -1.44384100 | 3.48427200  | 3.88207000  |
| C  | 0.06112700  | -0.32418400 | 4.21182200  |
| C  | -0.48891200 | -1.58741200 | 3.96595500  |
| C  | 1.45146100  | -0.20944000 | 4.31690400  |
| C  | 0.32895200  | -2.70600800 | 3.82370300  |
| H  | -1.57442000 | -1.69746600 | 3.91730500  |
| C  | 2.27122700  | -1.32723300 | 4.18544700  |
| H  | 1.88902800  | 0.76567500  | 4.53527700  |
| C  | 1.71185600  | -2.57791700 | 3.93360300  |
| H  | -0.11526500 | -3.68436600 | 3.64646200  |
| H  | 3.35004800  | -1.22303300 | 4.28562400  |
| H  | 2.35198300  | -3.45217100 | 3.83128800  |
| C  | -2.43982900 | 3.54498600  | 1.97462100  |
| C  | -1.65053500 | 4.57617200  | 1.45555300  |
| C  | -3.59788800 | 3.17584400  | 1.28068600  |
| C  | -1.99812300 | 5.21274300  | 0.26650700  |
| H  | -0.75960700 | 4.89202300  | 2.00177000  |
| C  | -3.95258300 | 3.81521000  | 0.09644100  |
| H  | -4.24407900 | 2.40122600  | 1.69522600  |
| C  | -3.14888000 | 4.83035100  | -0.41890100 |
| H  | -1.37407800 | 6.01803400  | -0.11834800 |
| H  | -4.87003900 | 3.53223800  | -0.41725600 |
| H  | -3.42980900 | 5.33634600  | -1.34051200 |
| C  | 2.05297800  | 3.06635800  | 2.24664300  |
| C  | 1.76401100  | 2.45115800  | 0.87762700  |
| C  | 0.10183600  | 1.97195600  | 2.29304900  |
| H  | 2.24771900  | 4.14256100  | 2.22066100  |
| H  | 2.58265200  | 1.80606600  | 0.53536400  |
| H  | 2.85146000  | 2.56246800  | 2.80218700  |
| O  | 0.81825500  | 2.85792000  | 2.99477000  |
| N  | 0.57327100  | 1.62029900  | 1.15115100  |
| C  | 1.43594600  | 3.46824200  | -0.21942600 |
| H  | 1.13714100  | 2.90538100  | -1.11408100 |
| H  | 0.56609700  | 4.05592600  | 0.10492400  |
| C  | 2.60243000  | 4.36284400  | -0.52168100 |
| C  | 2.65823300  | 5.66844200  | -0.02518800 |
| C  | 3.67903400  | 3.88543300  | -1.27706800 |
| C  | 3.76226300  | 6.48044000  | -0.27526400 |
| H  | 1.81577700  | 6.05724000  | 0.55185700  |
| C  | 4.78385900  | 4.69210000  | -1.52693200 |
| H  | 3.63597000  | 2.87278400  | -1.68089200 |
| C  | 4.82870300  | 5.99184200  | -1.02486200 |
| H  | 3.78721800  | 7.49701300  | 0.11222300  |
| H  | 5.61179600  | 4.30813300  | -2.12045000 |
| H  | 5.69149200  | 6.62422000  | -1.22295400 |
| Cu | -0.21517800 | 0.33727700  | -0.19334600 |
| C  | 2.16636300  | -1.27810900 | -0.73450000 |
| C  | 4.50095500  | -2.29142900 | -1.29686300 |
| C  | 5.75824400  | -2.17922600 | -1.89394300 |
| C  | 6.11134500  | -1.03296900 | -2.59400600 |
| C  | 5.19811600  | 0.00801900  | -2.68942300 |

|   |             |             |             |
|---|-------------|-------------|-------------|
| C | 3.94837900  | -0.11332400 | -2.09804600 |
| C | 3.55006100  | -1.26167500 | -1.39473500 |
| H | 6.46846600  | -2.99662400 | -1.80475700 |
| H | 7.09521400  | -0.96308100 | -3.05255400 |
| H | 5.44993200  | 0.92091900  | -3.22653800 |
| H | 3.24525800  | 0.70821500  | -2.19188600 |
| I | 4.24549300  | -4.14097100 | -0.22416400 |
| O | 1.46437900  | -0.05597900 | -1.15194400 |
| C | 1.29776700  | -2.49595300 | -1.05801700 |
| H | 1.49153300  | -3.31675600 | -0.36417900 |
| H | 0.24585200  | -2.20883600 | -0.92647400 |
| H | 1.42625900  | -2.84865300 | -2.08229300 |
| C | 2.30205400  | -1.13738100 | 0.77762700  |
| H | 1.31478400  | -1.16516300 | 1.26628200  |
| H | 2.88627000  | -1.96503800 | 1.18997200  |
| H | 2.80197100  | -0.20165500 | 1.05079500  |
| C | -3.18710300 | 1.29980400  | -2.48873700 |
| C | -1.86232300 | 1.26558900  | -2.05619900 |
| C | -1.10424600 | 0.07733500  | -2.06375900 |
| C | -1.75079500 | -1.07701900 | -2.54426600 |
| C | -3.05367900 | -1.03181800 | -3.02282000 |
| C | -3.81538400 | 0.14923600  | -2.98072200 |
| H | -3.72482800 | 2.24497400  | -2.45240000 |
| H | -1.40982800 | 2.19963600  | -1.70514500 |
| H | -1.19859100 | -2.01601300 | -2.60229000 |
| H | -3.49509300 | -1.93917300 | -3.43746900 |
| B | 0.84166200  | 0.14249700  | -2.48196300 |
| O | 1.04169100  | 1.49689900  | -2.82950400 |
| H | 0.46427900  | 1.77817300  | -3.54890300 |
| O | 1.06444900  | -0.90234100 | -3.37596400 |
| H | 1.10237500  | -0.58640800 | -4.28558900 |
| C | -5.25950600 | 0.13894600  | -3.47081400 |
| C | -6.03802400 | -0.96552900 | -2.74182300 |
| H | -6.01119000 | -0.82734200 | -1.65184300 |
| H | -7.08922300 | -0.95932900 | -3.05443900 |
| H | -5.63967300 | -1.96323300 | -2.96279700 |
| C | -5.27096700 | -0.15041300 | -4.97858100 |
| H | -6.30170200 | -0.18362200 | -5.35247500 |
| H | -4.73539200 | 0.62629100  | -5.53753800 |
| H | -4.80192200 | -1.11402900 | -5.21083900 |
| C | -5.96400800 | 1.47097300  | -3.21878900 |
| H | -7.00293100 | 1.41435600  | -3.56242900 |
| H | -5.98467100 | 1.72453700  | -2.15055500 |
| H | -5.48875800 | 2.29956900  | -3.75783000 |

### ArB(OH)<sub>2</sub>

|   |             |             |             |
|---|-------------|-------------|-------------|
| C | 0.37038200  | -1.19605100 | -0.03020400 |
| C | -1.01928300 | -1.19504900 | -0.01593300 |
| C | -1.75157800 | 0.00000000  | -0.01059800 |
| C | -1.01928300 | 1.19505000  | -0.01595400 |
| C | 0.37038100  | 1.19605200  | -0.03022400 |
| C | 1.10037700  | 0.00000000  | -0.04279400 |
| H | 0.89400900  | -2.15053900 | -0.03447000 |
| H | -1.55560400 | -2.14378900 | -0.01123600 |
| H | -1.55560500 | 2.14378900  | -0.01127300 |
| H | 0.89400800  | 2.15054000  | -0.03450700 |
| B | -3.30316100 | 0.00000000  | 0.00062100  |
| O | -3.94721500 | -1.21471600 | 0.00550000  |
| H | -4.90902800 | -1.15364400 | 0.01284000  |
| O | -3.94721500 | 1.21471500  | 0.00547900  |
| H | -4.90902900 | 1.15364400  | 0.01282100  |
| C | 2.62834500  | 0.00000000  | -0.00149300 |
| C | 3.21069600  | 1.23825700  | -0.69064300 |

|   |            |             |             |
|---|------------|-------------|-------------|
| H | 2.96041400 | 2.16643000  | -0.16461500 |
| H | 4.30555900 | 1.17149800  | -0.71611000 |
| H | 2.85466400 | 1.33014700  | -1.72434700 |
| C | 3.21069400 | -1.23824700 | -0.69066200 |
| H | 4.30555800 | -1.17149000 | -0.71612600 |
| H | 2.96041000 | -2.16642800 | -0.16465000 |
| H | 2.85466400 | -1.33011900 | -1.72436800 |
| C | 3.06943900 | -0.00001100 | 1.46955800  |
| H | 4.16530800 | -0.00001200 | 1.54697000  |
| H | 2.69244600 | 0.88578900  | 1.99591200  |
| H | 2.69244600 | -0.88581900 | 1.99589900  |

**INT5** S\*\*2 = 0.75

|   |             |             |             |
|---|-------------|-------------|-------------|
| C | -2.01836200 | -2.62426400 | 1.47770600  |
| C | -1.95497600 | -1.32738600 | 0.65768300  |
| C | 0.11404300  | -2.14096300 | 0.96745200  |
| H | -2.52938600 | -3.44025600 | 0.95324600  |
| H | -2.30384200 | -0.46042300 | 1.23682300  |
| H | -2.44170000 | -2.51667900 | 2.47917300  |
| O | -0.62625900 | -3.02558200 | 1.63836000  |
| N | -0.51190600 | -1.16067300 | 0.42100600  |
| C | -2.72778000 | -1.38657800 | -0.65825400 |
| H | -2.47712200 | -0.48576600 | -1.23576500 |
| H | -2.37257600 | -2.25351000 | -1.23509200 |
| C | -4.20672300 | -1.46545800 | -0.40963400 |
| C | -4.89856900 | -2.67040700 | -0.55021600 |
| C | -4.90487300 | -0.33113500 | 0.02177400  |
| C | -6.26091100 | -2.74545900 | -0.26898000 |
| H | -4.36464300 | -3.55576600 | -0.90121200 |
| C | -6.26464300 | -0.40431900 | 0.30462500  |
| H | -4.37241700 | 0.61821600  | 0.12596900  |
| C | -6.94523300 | -1.61252900 | 0.16079300  |
| H | -6.78825900 | -3.68959700 | -0.39092100 |
| H | -6.79870300 | 0.48499900  | 0.63503400  |
| H | -8.00972700 | -1.66791400 | 0.37872700  |
| C | 1.58065400  | -2.46432900 | 0.96402800  |
| C | 1.73743100  | -3.91155900 | 0.39943400  |
| H | 1.35686100  | -4.59871900 | 1.16345400  |
| H | 2.81014800  | -4.10898200 | 0.29017000  |
| C | 2.11163400  | -2.39411200 | 2.43476300  |
| H | 1.49791300  | -3.08114500 | 3.02955700  |
| H | 3.13463400  | -2.78787300 | 2.42894600  |
| C | 0.99393600  | -4.10346800 | -0.89501300 |
| C | -0.23120400 | -4.77795200 | -0.90877300 |
| C | 1.47033900  | -3.55678400 | -2.09212400 |
| C | -0.96776500 | -4.89629400 | -2.08467900 |
| H | -0.60159200 | -5.22329500 | 0.01467100  |
| C | 0.73373400  | -3.66838500 | -3.26789300 |
| H | 2.44251300  | -3.06000300 | -2.11070200 |
| C | -0.49079900 | -4.33329400 | -3.26572000 |
| H | -1.91087500 | -5.44052800 | -2.08072000 |
| H | 1.12393100  | -3.24952300 | -4.19336400 |
| H | -1.06263400 | -4.42599400 | -4.18656600 |
| C | 2.07091800  | -0.99685200 | 2.98707900  |
| C | 3.20235300  | -0.17599900 | 2.93410200  |
| C | 0.88011700  | -0.46278800 | 3.49390000  |
| C | 3.14479500  | 1.14682500  | 3.36650700  |
| H | 4.14237800  | -0.58673000 | 2.56090200  |
| C | 0.81861100  | 0.86030100  | 3.92194400  |
| H | -0.00448900 | -1.09797100 | 3.56951500  |
| C | 1.94961500  | 1.67145300  | 3.85207900  |
| H | 4.03872900  | 1.76783700  | 3.33412500  |
| H | -0.11086100 | 1.25556000  | 4.32787000  |

|    |             |             |             |
|----|-------------|-------------|-------------|
| H  | 1.90428400  | 2.70309500  | 4.19366600  |
| C  | 4.39819200  | -0.80459700 | -0.63068600 |
| C  | 3.29854200  | 0.19986300  | -1.00218800 |
| C  | 2.41361200  | -1.51316800 | 0.14920200  |
| H  | 5.15722000  | -0.39274100 | 0.04356000  |
| H  | 3.17538700  | 0.26440300  | -2.09215400 |
| H  | 4.89536500  | -1.27117100 | -1.48446300 |
| O  | 3.70082300  | -1.85730100 | 0.09048100  |
| N  | 2.08068100  | -0.41468600 | -0.43534300 |
| C  | 3.50445900  | 1.60525200  | -0.43049300 |
| H  | 2.64652700  | 2.22808400  | -0.72926000 |
| H  | 3.47551400  | 1.53512100  | 0.66644900  |
| C  | 4.79815700  | 2.21415900  | -0.89117700 |
| C  | 5.91891800  | 2.21522700  | -0.05529200 |
| C  | 4.92128100  | 2.74093400  | -2.18093800 |
| C  | 7.13644600  | 2.72766200  | -0.49614000 |
| H  | 5.82902600  | 1.82261900  | 0.96008100  |
| C  | 6.13502800  | 3.25664700  | -2.62321100 |
| H  | 4.05214200  | 2.75950700  | -2.84025500 |
| C  | 7.24605000  | 3.24844900  | -1.78222500 |
| H  | 7.99791000  | 2.72671000  | 0.16849200  |
| H  | 6.21385800  | 3.67154800  | -3.62599100 |
| H  | 8.19449400  | 3.65341400  | -2.12811000 |
| Cu | 0.32604700  | 0.47099000  | -0.34840900 |
| C  | -2.67052900 | 3.11738600  | -1.60793700 |
| C  | -1.65268600 | 2.16218200  | -1.59714700 |
| C  | -1.13089000 | 1.68956000  | -0.38880100 |
| C  | -1.71250500 | 2.13427900  | 0.80599300  |
| C  | -2.73436800 | 3.07702400  | 0.78700000  |
| C  | -3.24010500 | 3.58681900  | -0.41992100 |
| H  | -3.03089700 | 3.48318500  | -2.56704100 |
| H  | -1.26864800 | 1.80151500  | -2.55268300 |
| H  | -1.35560200 | 1.75919600  | 1.76805100  |
| H  | -3.15498100 | 3.41714100  | 1.73362600  |
| C  | -4.40883200 | 4.56871000  | -0.39595900 |
| C  | -4.06490600 | 5.76237900  | 0.50429900  |
| H  | -3.17966400 | 6.29605700  | 0.13783700  |
| H  | -4.90093000 | 6.47198200  | 0.52393400  |
| H  | -3.86896400 | 5.45974500  | 1.53946600  |
| C  | -5.64161100 | 3.84433600  | 0.16574800  |
| H  | -6.49613000 | 4.53001300  | 0.22388900  |
| H  | -5.92955800 | 3.00191700  | -0.47656100 |
| H  | -5.46030800 | 3.45213600  | 1.17500800  |
| C  | -4.74851600 | 5.09547300  | -1.78906400 |
| H  | -5.57241800 | 5.81522800  | -1.72338100 |
| H  | -3.89735400 | 5.61165300  | -2.25043100 |
| H  | -5.07034400 | 4.29452000  | -2.46598600 |

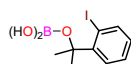

|   |             |             |             |
|---|-------------|-------------|-------------|
| C | 0.78390000  | 1.43286000  | 0.31533700  |
| C | -1.38561200 | 0.05518300  | -0.07963600 |
| C | -2.75444100 | -0.00599700 | -0.34129400 |
| C | -3.49848500 | 1.15618200  | -0.50516500 |
| C | -2.86428000 | 2.38604900  | -0.40366400 |
| C | -1.49868100 | 2.43466400  | -0.15330800 |
| C | -0.71266500 | 1.28495800  | 0.01003100  |
| H | -3.24200800 | -0.97455100 | -0.41848100 |
| H | -4.56565700 | 1.09039700  | -0.70882600 |
| H | -3.42333100 | 3.31204100  | -0.52483400 |
| H | -1.02023600 | 3.40824700  | -0.08930500 |
| I | -0.48368600 | -1.87986100 | 0.17822300  |
| O | 1.43880500  | 0.51883600  | -0.57005400 |

|   |            |             |             |   |             |             |             |
|---|------------|-------------|-------------|---|-------------|-------------|-------------|
| C | 1.31598500 | 2.83230100  | 0.01867800  | H | -1.04131800 | -1.41732200 | -5.20639500 |
| H | 0.90099700 | 3.58274600  | 0.70034300  | H | 3.17074500  | -2.26972200 | -5.14887800 |
| H | 2.40077000 | 2.82778700  | 0.15671800  | H | 1.26605300  | -0.90166700 | -5.97171900 |
| H | 1.09523800 | 3.13078800  | -1.01200200 | C | -3.21227600 | -3.19757800 | -1.12009100 |
| C | 1.03503900 | 1.09922900  | 1.78765600  | C | -2.67935200 | -1.93208800 | -0.44083600 |
| H | 2.08874200 | 1.24559500  | 2.04130500  | C | -0.98631300 | -3.32199100 | -0.86291000 |
| H | 0.42862400 | 1.75788300  | 2.42042600  | H | -3.58823300 | -3.02147600 | -2.13609400 |
| H | 0.76150900 | 0.06522700  | 2.01900500  | H | -3.00670900 | -1.89527200 | 0.60760400  |
| B | 2.74981500 | 0.16750900  | -0.55926100 | H | -3.96839000 | -3.74127600 | -0.54847000 |
| O | 3.64313300 | 0.76591600  | 0.31002200  | O | -2.04821000 | -4.05757200 | -1.22711000 |
| H | 4.53950300 | 0.42267900  | 0.23625000  | N | -1.22066400 | -2.13693500 | -0.42406600 |
| O | 3.08963300 | -0.79796600 | -1.47542000 | C | -3.00314000 | -0.62432900 | -1.14181300 |
| H | 4.02501300 | -1.02059700 | -1.47833900 | H | -2.34648000 | 0.15529200  | -0.71086900 |

### INT6 S\*\*2 = 2.00

|   |             |             |             |    |             |             |             |
|---|-------------|-------------|-------------|----|-------------|-------------|-------------|
| C | 3.75510800  | -2.92358500 | -0.78392000 | C  | -4.43115300 | -0.15653500 | -1.07600000 |
| C | 3.04650800  | -1.59381900 | -0.49910600 | C  | -4.81990600 | 0.92094800  | -1.88071100 |
| C | 1.53100200  | -3.21399100 | -0.75750100 | C  | -5.38033700 | -0.72529300 | -0.22116300 |
| H | 4.47118400  | -3.21942700 | -0.01063600 | C  | -6.11590500 | 1.41706800  | -1.83198400 |
| H | 3.28141200  | -0.83440600 | -1.25726900 | H  | -4.08411400 | 1.38221200  | -2.54201600 |
| H | 4.23824300  | -2.97178700 | -1.76505600 | C  | -6.68238300 | -0.22770100 | -0.16817800 |
| O | 2.68119400  | -3.90581300 | -0.78720400 | H  | -5.11497100 | -1.57150600 | 0.41430500  |
| N | 1.62362100  | -1.94139900 | -0.63268500 | C  | -7.05356200 | 0.84385600  | -0.97306400 |
| C | 3.31705000  | -1.03532000 | 0.89750000  | H  | -6.39687000 | 2.25703900  | -2.46497200 |
| H | 2.57421900  | -0.24978200 | 1.10027000  | H  | -7.40786000 | -0.68694600 | 0.50026000  |
| H | 3.11667300  | -1.82737400 | 1.63486900  | H  | -8.07075600 | 1.22812800  | -0.93697600 |
| C | 4.71381400  | -0.50869700 | 1.06687000  | Cu | 0.12822200  | -0.59940600 | -0.27936000 |
| C | 5.58079500  | -1.07131700 | 2.00723000  | C  | 1.91613400  | 3.09026600  | -1.31108000 |
| C | 5.16740500  | 0.57153200  | 0.29977200  | C  | 1.66985600  | 1.83750900  | -0.74373300 |
| C | 6.86487300  | -0.56224900 | 2.19095900  | C  | 0.63899900  | 1.02730700  | -1.21117300 |
| H | 5.23830700  | -1.91194000 | 2.61276500  | C  | -0.11358200 | 1.47672500  | -2.30120800 |
| C | 6.44952300  | 1.08018300  | 0.47834600  | C  | 0.12373900  | 2.73622700  | -2.85162800 |
| H | 4.50093100  | 1.03340900  | -0.43138200 | C  | 1.14068700  | 3.57242900  | -2.36860900 |
| C | 7.30139100  | 0.51665200  | 1.42717800  | H  | 2.72607000  | 3.69040100  | -0.89977700 |
| H | 7.52419800  | -1.01028300 | 2.93174000  | H  | 2.28280900  | 1.52869800  | 0.10339900  |
| H | 6.78377800  | 1.92512300  | -0.12108200 | H  | -0.91264600 | 0.86420900  | -0.72370100 |
| H | 8.30351900  | 0.91626200  | 1.56792100  | H  | -0.50301300 | 3.07178900  | -3.67987700 |
| C | 0.31141300  | -4.08061600 | -0.92805900 | C  | 1.35155300  | 4.95552200  | -2.98170200 |
| C | 0.26096900  | -5.13281900 | 0.23246800  | C  | 0.09070000  | 5.79767400  | -2.74471600 |
| H | 1.22767900  | -5.64989600 | 0.24720300  | H  | -0.10588500 | 5.91482200  | -1.66961400 |
| H | -0.50581000 | -5.87131400 | -0.03094100 | H  | 0.20614800  | 6.80052300  | -3.17497700 |
| C | 0.43991800  | -4.78190900 | -2.31509400 | H  | -0.79471400 | 5.33990900  | -3.20440800 |
| H | 1.28654900  | -5.47518000 | -2.25502100 | C  | 1.59603100  | 4.82456400  | -4.49004900 |
| H | -0.46515600 | -5.37859000 | -2.47372700 | H  | 1.73744100  | 5.81380600  | -4.94298500 |
| C | -0.04949000 | -4.47161200 | 1.54662600  | H  | 2.49334100  | 4.22865100  | -4.69613400 |
| C | 0.94652100  | -3.78582700 | 2.24878600  | H  | 0.75304600  | 4.34575900  | -5.00224200 |
| C | -1.36618600 | -4.40085900 | 2.01366200  | C  | 2.53991300  | 5.68676900  | -2.35848500 |
| C | 0.63247400  | -3.01902700 | 3.36705700  | H  | 2.66049300  | 6.67064000  | -2.82648400 |
| H | 1.98179500  | -3.85939800 | 1.91027500  | H  | 2.40202500  | 5.85112700  | -1.28135400 |
| C | -1.68436500 | -3.63800500 | 3.13457200  | H  | 3.47888100  | 5.13733700  | -2.49962200 |
| H | -2.14853500 | -4.94842700 | 1.48521800  | C  | -2.56306200 | 0.11857200  | 2.27938600  |
| C | -0.68680400 | -2.93341900 | 3.80677500  | H  | -1.93739500 | -0.76812600 | 2.10567100  |
| H | 1.41969200  | -2.48606900 | 3.89813900  | H  | -3.55120700 | -0.06059500 | 1.83740700  |
| H | -2.71312600 | -3.59377200 | 3.48889500  | C  | -1.89822700 | 1.32280000  | 1.69031000  |
| H | -0.93608700 | -2.33087200 | 4.67718600  | C  | -2.63270900 | 2.37075100  | 1.04592000  |
| C | 0.65034500  | -3.77389300 | -3.41290200 | C  | -4.03111700 | 2.50930400  | 1.24017900  |
| C | -0.41712900 | -3.01633200 | -3.90876100 | C  | -2.00237000 | 3.26058100  | 0.13212800  |
| C | 1.93903400  | -3.49445800 | -3.87787700 | C  | -4.74830000 | 3.49356500  | 0.58272300  |
| C | -0.19816600 | -1.98997200 | -4.82303400 | H  | -4.54439700 | 1.85654000  | 1.94177700  |
| H | -1.43351600 | -3.24983800 | -3.58975200 | C  | -2.73730300 | 4.22652200  | -0.53510800 |
| C | 2.16170500  | -2.46791000 | -4.79196800 | H  | -0.93985300 | 3.14781800  | -0.09008400 |
| H | 2.77389300  | -4.09690200 | -3.51834700 | C  | -4.10997500 | 4.35697100  | -0.30997300 |
| C | 1.09422300  | -1.70451800 | -5.25809100 | H  | -5.81744900 | 3.58591100  | 0.76184500  |
|   |             |             |             | H  | -2.23690300 | 4.87873000  | -1.24851300 |

|            |                    |             |             |    |             |             |             |
|------------|--------------------|-------------|-------------|----|-------------|-------------|-------------|
| H          | -4.67954600        | 5.12258500  | -0.83283800 | C  | 3.33201800  | -2.31609000 | 3.69666200  |
| C          | -0.43454600        | 1.32759400  | 1.83045900  | C  | 0.94288300  | -2.16088300 | 3.90198300  |
| O          | 0.23862100         | 0.27742300  | 1.67332200  | C  | 3.47356800  | -1.12943100 | 4.41189100  |
| N          | 0.12533200         | 2.50581100  | 2.19589200  | H  | 4.21557500  | -2.84928700 | 3.34607100  |
| H          | -0.51717600        | 3.28644900  | 2.27296900  | C  | 1.07864300  | -0.97006400 | 4.60992700  |
| C          | 1.49392700         | 2.81708600  | 2.35323900  | H  | -0.05323100 | -2.57146000 | 3.73424300  |
| C          | 1.90382900         | 4.10933700  | 2.01393500  | C  | 2.34519900  | -0.44424600 | 4.85729200  |
| C          | 2.41900200         | 1.88523200  | 2.83249500  | H  | 4.46916500  | -0.74439400 | 4.62794200  |
| C          | 3.24378700         | 4.46141700  | 2.12316200  | H  | 0.19187100  | -0.45291800 | 4.97165400  |
| H          | 1.17314300         | 4.82351600  | 1.63127800  | H  | 2.45174600  | 0.48466300  | 5.41421400  |
| C          | 3.75845000         | 2.24918500  | 2.93015700  | C  | 4.39976100  | -1.62353400 | 0.46278200  |
| H          | 2.08808600         | 0.89273800  | 3.12278700  | C  | 3.35557400  | -0.66186800 | -0.10596300 |
| C          | 4.17738100         | 3.52847200  | 2.56957700  | C  | 2.35133700  | -2.50742800 | 0.63520400  |
| H          | 3.55833700         | 5.46623900  | 1.84803800  | H  | 4.82617800  | -1.27679700 | 1.41439300  |
| H          | 4.48351200         | 1.52240400  | 3.29166900  | H  | 3.46918500  | -0.58497900 | -1.19626700 |
| H          | 5.22866500         | 3.79739400  | 2.64520800  | H  | 5.20669600  | -1.88514000 | -0.22491000 |
| C          | -2.73221700        | 0.21219300  | 3.78107800  | O  | 3.64725800  | -2.82934300 | 0.74084300  |
| F          | -3.29560800        | -0.90777300 | 4.27214900  | N  | 2.07396400  | -1.34339400 | 0.16209700  |
| F          | -3.50983900        | 1.25052500  | 4.13859700  | C  | 3.36323100  | 0.72141200  | 0.53358800  |
| F          | -1.54125700        | 0.37266500  | 4.39470600  | H  | 2.52518100  | 1.30442500  | 0.11067800  |
|            |                    |             |             | H  | 3.13689200  | 0.59627800  | 1.60411300  |
| <b>TS4</b> | <b>S**2 = 0.44</b> |             |             | C  | 4.66618100  | 1.45154400  | 0.36070900  |
| C          | -2.10829500        | -3.73212400 | 1.80454300  | C  | 5.36629400  | 1.92341600  | 1.47381100  |
| C          | -2.05389700        | -2.36272100 | 1.11727800  | C  | 5.20993800  | 1.66963900  | -0.91091400 |
| C          | -0.00755800        | -3.26306300 | 1.16752600  | C  | 6.56916000  | 2.60916700  | 1.32327300  |
| H          | -2.80751900        | -4.43134300 | 1.33574600  | H  | 4.95536800  | 1.75393400  | 2.47021400  |
| H          | -2.39382600        | -1.55604200 | 1.78111500  | C  | 6.41153900  | 2.35286700  | -1.06659200 |
| H          | -2.30400800        | -3.69478800 | 2.88127800  | H  | 4.68871600  | 1.29929900  | -1.79680100 |
| O          | -0.76762300        | -4.26821700 | 1.63165100  | C  | 7.09363000  | 2.82711700  | 0.05254800  |
| N          | -0.61049800        | -2.16806000 | 0.87861400  | H  | 7.09867700  | 2.97184500  | 2.20194400  |
| C          | -2.83733200        | -2.31836300 | -0.19361700 | H  | 6.81853400  | 2.51359200  | -2.06296500 |
| H          | -2.52739700        | -1.42489000 | -0.75013600 | H  | 8.03376700  | 3.36101900  | -0.06735400 |
| H          | -2.52910000        | -3.17336100 | -0.81345000 | Cu | 0.27350200  | -0.42581100 | 0.27199600  |
| C          | -4.32688200        | -2.34249100 | 0.01047700  | C  | -2.89698600 | 2.12435700  | 1.39451000  |
| C          | -5.10988600        | -3.34928200 | -0.56080500 | C  | -2.14622600 | 1.08883800  | 0.83249800  |
| C          | -4.96512200        | -1.34132500 | 0.75338400  | C  | -0.80159400 | 0.91537800  | 1.15205100  |
| C          | -6.49503100        | -3.35243400 | -0.40901700 | C  | -0.23347900 | 1.76986900  | 2.10342400  |
| H          | -4.62619100        | -4.13529100 | -1.14276800 | C  | -0.98246500 | 2.81084600  | 2.65184800  |
| C          | -6.34709500        | -1.34280400 | 0.90951800  | C  | -2.32694900 | 3.01601800  | 2.30823800  |
| H          | -4.37433000        | -0.54007600 | 1.20125700  | H  | -3.93883800 | 2.22724800  | 1.09350000  |
| C          | -7.11746400        | -2.34710900 | 0.32579900  | H  | -2.62732700 | 0.44552700  | 0.09519600  |
| H          | -7.08753500        | -4.14333100 | -0.86479900 | H  | 0.80662900  | 1.65217500  | 2.41471400  |
| H          | -6.82622900        | -0.55200500 | 1.48430500  | H  | -0.50177600 | 3.48034400  | 3.36716700  |
| H          | -8.19870400        | -2.34777000 | 0.44719500  | C  | -3.10109000 | 4.18693800  | 2.91064000  |
| C          | 1.45108900         | -3.62359800 | 1.08795800  | C  | -2.44997900 | 5.49758000  | 2.44843700  |
| C          | 1.61595600         | -4.78451900 | 0.04733500  | H  | -2.48709900 | 5.58801600  | 1.35358300  |
| H          | 0.92575500         | -5.58844900 | 0.32900900  | H  | -2.97474900 | 6.36305100  | 2.87224800  |
| H          | 2.63668700         | -5.17140700 | 0.14987800  | H  | -1.39940000 | 5.56121900  | 2.75982600  |
| C          | 1.92414100         | -4.04486500 | 2.51865400  | C  | -3.05332600 | 4.11033400  | 4.44167600  |
| H          | 1.20439000         | -4.77276900 | 2.90917600  | H  | -3.60083200 | 4.95166600  | 4.88432800  |
| H          | 2.88658200         | -4.55684600 | 2.41339900  | H  | -3.51013900 | 3.18255700  | 4.80694600  |
| C          | 1.36649900         | -4.27517700 | -1.34655500 | H  | -2.02635200 | 4.14957800  | 4.82355200  |
| C          | 0.06175500         | -4.10327300 | -1.81791900 | C  | -4.56435400 | 4.19746000  | 2.47031100  |
| C          | 2.42745600         | -3.81494400 | -2.13447900 | H  | -5.08627600 | 5.04526700  | 2.92891400  |
| C          | -0.18363000        | -3.45259500 | -3.02343800 | H  | -4.66481000 | 4.30153000  | 1.38177000  |
| H          | -0.77078800        | -4.48592000 | -1.22477300 | H  | -5.09054400 | 3.28362800  | 2.77311400  |
| C          | 2.18752200         | -3.17034700 | -3.34526000 | C  | 1.58722200  | 0.66904000  | -2.60910000 |
| H          | 3.45159500         | -3.95902800 | -1.78668400 | H  | 1.38779300  | -0.38168100 | -2.35429100 |
| C          | 0.87952100         | -2.97312200 | -3.78551800 | H  | 2.61186900  | 0.90745800  | -2.31003300 |
| H          | -1.20762200        | -3.31376800 | -3.36651300 | C  | 0.58581900  | 1.55715600  | -1.93406700 |
| H          | 3.02306300         | -2.81994900 | -3.94884400 | C  | 0.92000700  | 2.87283800  | -1.47251600 |
| H          | 0.69161300         | -2.45686900 | -4.72476800 | C  | 2.18240500  | 3.44985300  | -1.77619700 |
| C          | 2.06585100         | -2.84246500 | 3.41717700  | C  | 0.04849800  | 3.62218600  | -0.63366600 |

|   |             |             |             |   |             |             |             |
|---|-------------|-------------|-------------|---|-------------|-------------|-------------|
| C | 2.54809800  | 4.68713800  | -1.27702800 | H | 0.35095400  | 2.88696000  | -0.79301700 |
| H | 2.86898400  | 2.93073200  | -2.43906400 | C | 3.06912100  | 3.55969200  | -2.71799100 |
| C | 0.42488100  | 4.86126300  | -0.14389300 | H | 3.97532100  | 2.17315600  | -4.09434300 |
| H | -0.90173000 | 3.19456800  | -0.31588100 | H | 1.95701200  | 4.69673900  | -1.26182300 |
| C | 1.67238800  | 5.40390900  | -0.45876200 | H | 3.79580500  | 4.34755600  | -2.90350200 |
| H | 3.52273200  | 5.09912800  | -1.53029900 | C | -1.25134800 | 0.67281100  | -2.24279200 |
| H | -0.25443700 | 5.40128900  | 0.51288400  | O | -2.03340100 | -0.28018600 | -2.23462600 |
| H | 1.96284100  | 6.37489900  | -0.06365100 | N | -1.63311800 | 1.95657100  | -2.48683100 |
| C | -0.78468200 | 0.99231600  | -1.97849800 | H | -0.89385700 | 2.64692700  | -2.52374700 |
| O | -0.95831700 | -0.22494500 | -1.77580600 | C | -2.93358200 | 2.49058600  | -2.38606700 |
| N | -1.78441200 | 1.85241300  | -2.30067500 | C | -3.03070800 | 3.85367600  | -2.07990300 |
| H | -1.50762800 | 2.81742800  | -2.43974800 | C | -4.09546900 | 1.72258200  | -2.52489100 |
| C | -3.17647500 | 1.62094600  | -2.24828700 | C | -4.27432700 | 4.44354300  | -1.89737600 |
| C | -3.99526800 | 2.71236600  | -1.93971700 | H | -2.12098900 | 4.44487200  | -1.96212000 |
| C | -3.73899500 | 0.35974300  | -2.46806900 | C | -5.33412000 | 2.32718500  | -2.32876600 |
| C | -5.36879900 | 2.53825500  | -1.82225600 | H | -4.02251800 | 0.67111700  | -2.77638000 |
| H | -3.54647200 | 3.69110200  | -1.76241500 | C | -5.43494700 | 3.68003900  | -2.01292000 |
| C | -5.11464500 | 0.19836000  | -2.33398000 | H | -4.33522700 | 5.50381300  | -1.65837300 |
| H | -3.10424400 | -0.47684600 | -2.74004400 | H | -6.23481500 | 1.72619000  | -2.43834300 |
| C | -5.93230100 | 1.27717000  | -2.00567700 | H | -6.41009600 | 4.14001500  | -1.86933700 |
| H | -5.99783500 | 3.39124900  | -1.57576900 | C | 0.28817200  | -1.23722600 | -3.94368900 |
| H | -5.55019300 | -0.78756200 | -2.48534300 | F | 1.38299900  | -1.77305900 | -4.53529200 |
| H | -7.00546400 | 1.13522800  | -1.89916300 | F | -0.00102700 | -0.10299500 | -4.61201300 |
| C | 1.53417900  | 0.75434400  | -4.12188800 | F | -0.72209900 | -2.08984600 | -4.13727700 |
| F | 2.41882500  | -0.09565400 | -4.67493100 | C | 4.45755000  | -1.27670100 | 0.19734800  |
| F | 1.82695200  | 1.99265100  | -4.56291600 | C | 3.32151000  | -0.34106400 | -0.22023100 |
| F | 0.31249400  | 0.43854300  | -4.59172300 | C | 2.49594900  | -2.01908900 | 0.98706800  |

## INT7

|    |             |             |             |   |            |             |             |
|----|-------------|-------------|-------------|---|------------|-------------|-------------|
| Cu | 0.20798400  | -0.30097000 | 0.00189200  | H | 5.25207300 | -0.78174600 | 0.76422900  |
| C  | -3.08187500 | 2.17004200  | 1.09192300  | H | 3.28625900 | -0.20123200 | -1.30902200 |
| C  | -2.34967500 | 1.18121300  | 0.42769300  | H | 4.89831000 | -1.84854200 | -0.62687800 |
| C  | -0.98136900 | 1.09473700  | 0.61179500  | O | 3.81414500 | -2.22552900 | 1.08696300  |
| C  | -0.33491500 | 1.97834000  | 1.47720100  | N | 2.10787500 | -1.06584100 | 0.21413400  |
| C  | -1.08091400 | 2.95881700  | 2.13257800  | C | 3.34422000 | 1.00645200  | 0.48420600  |
| C  | -2.46333500 | 3.08885800  | 1.94205600  | H | 2.39480600 | 1.51572500  | 0.25895100  |
| H  | -4.15206900 | 2.22707300  | 0.89848200  | H | 3.32481000 | 0.81953600  | 1.57045600  |
| H  | -2.86694800 | 0.52281200  | -0.26877600 | C | 4.49057700 | 1.91510300  | 0.13489500  |
| H  | 0.74001900  | 1.92132500  | 1.66093600  | C | 4.61661500 | 3.12669200  | 0.82513700  |
| H  | -0.55693900 | 3.64586400  | 2.79906400  | C | 5.42270100 | 1.61949900  | -0.86252800 |
| C  | -3.21928300 | 4.22904700  | 2.62045300  | C | 5.63373000 | 4.02247500  | 0.51828600  |
| C  | -2.65527700 | 5.56282700  | 2.11079200  | H | 3.89622200 | 3.36508900  | 1.61050700  |
| H  | -2.77237400 | 5.65029000  | 1.02273400  | C | 6.44764900 | 2.51281900  | -1.17058900 |
| H  | -3.18237400 | 6.40532100  | 2.57558700  | H | 5.34785000 | 0.69094600  | -1.43054800 |
| H  | -1.58858500 | 5.67094400  | 2.34308200  | C | 6.55470500 | 3.71735300  | -0.48359700 |
| C  | -3.02610400 | 4.14279400  | 4.13978500  | H | 5.71290100 | 4.96029000  | 1.06474200  |
| H  | -3.55196400 | 4.96574000  | 4.63931600  | H | 7.16387300 | 2.26327500  | -1.95120000 |
| H  | -3.42200400 | 3.20071100  | 4.53879100  | H | 7.35479500 | 4.41465800  | -0.72246500 |
| H  | -1.96873500 | 4.20925400  | 4.42430700  | C | 1.70353100 | -2.95380100 | 1.85315600  |
| C  | -4.71571900 | 4.18908000  | 2.31489200  | C | 2.24568600 | -2.81375700 | 3.31487900  |
| H  | -5.22070400 | 5.01908500  | 2.82229700  | H | 3.23843200 | -3.27661400 | 3.33882300  |
| H  | -4.91755200 | 4.28799200  | 1.24040700  | H | 1.59199400 | -3.41292300 | 3.95996400  |
| H  | -5.18131100 | 3.25910400  | 2.66473000  | C | 1.92316100 | -4.41025400 | 1.33261000  |
| C  | 0.57084300  | -0.98230800 | -2.45438500 | H | 2.99334800 | -4.62706600 | 1.43131800  |
| H  | -0.01376400 | -1.74070400 | -1.91352700 | H | 1.38638200 | -5.08620300 | 2.00789300  |
| H  | 1.62574300  | -1.20554500 | -2.27684900 | C | 2.32871600 | -1.38303300 | 3.77801400  |
| C  | 0.21491700  | 0.42152300  | -1.96079800 | C | 3.56727300 | -0.73493100 | 3.84759500  |
| C  | 1.20996300  | 1.49451700  | -2.20641300 | C | 1.17700200 | -0.65428100 | 4.10003100  |
| C  | 2.26567700  | 1.31648200  | -3.12107600 | C | 3.65392100 | 0.60646600  | 4.21421900  |
| C  | 1.12279000  | 2.74033800  | -1.54936000 | H | 4.47315700 | -1.29503800 | 3.61525200  |
| C  | 3.17489900  | 2.33773400  | -3.37558700 | C | 1.25845900 | 0.68802800  | 4.45942800  |
| H  | 2.36329200  | 0.38056500  | -3.66755500 | H | 0.20339000 | -1.14616900 | 4.08993000  |
| C  | 2.03780300  | 3.75463000  | -1.80060400 | C | 2.49725600 | 1.32499700  | 4.50907100  |
|    |             |             |             | H | 4.62771500 | 1.09062700  | 4.26817000  |
|    |             |             |             | H | 0.35085000 | 1.23489500  | 4.70904200  |



|            |             |             |             |   |             |             |             |
|------------|-------------|-------------|-------------|---|-------------|-------------|-------------|
| H          | 2.56213100  | 2.37263400  | 4.79741100  | C | -0.21952700 | 1.89504200  | 0.40452300  |
| C          | 1.46916900  | -4.57593400 | -0.09149000 | C | -0.13356200 | 2.53440500  | 1.75695500  |
| C          | 0.15273000  | -4.94212000 | -0.38975300 | C | 1.05226600  | 3.12446400  | 2.22436100  |
| C          | 2.33985700  | -4.29197000 | -1.15023700 | C | -1.22415500 | 2.49956900  | 2.65022800  |
| C          | -0.28740600 | -5.00806800 | -1.71007500 | C | 1.14467700  | 3.65561200  | 3.50724100  |
| H          | -0.52988400 | -5.19189300 | 0.42493100  | H | 1.93223200  | 3.19658900  | 1.59024100  |
| C          | 1.90478400  | -4.35954100 | -2.47094800 | C | -1.13805700 | 3.04319700  | 3.92386500  |
| H          | 3.37783300  | -4.03620400 | -0.93072400 | H | -2.14000500 | 1.98535800  | 2.36202000  |
| C          | 0.58629000  | -4.71150000 | -2.75391800 | C | 0.05042600  | 3.62380300  | 4.36384200  |
| H          | -1.31448300 | -5.29949800 | -1.92459000 | H | 2.08349400  | 4.10151000  | 3.82920000  |
| H          | 2.59553600  | -4.14278700 | -3.28369100 | H | -2.00101500 | 2.99356500  | 4.58496600  |
| H          | 0.24365400  | -4.75988400 | -3.78485000 | H | 0.12250000  | 4.03986700  | 5.36616900  |
| C          | -1.84948000 | -3.07902300 | 2.59775600  | C | -1.48513900 | 1.95438900  | -0.42752400 |
| C          | -1.87234200 | -1.98168200 | 1.53092500  | O | -1.55488100 | 1.19936900  | -1.40423700 |
| C          | 0.22969600  | -2.67140600 | 1.86079900  | N | -2.43533400 | 2.85811000  | -0.09936000 |
| H          | -2.48315100 | -3.93916100 | 2.35939800  | H | -2.27310200 | 3.41641700  | 0.73122800  |
| H          | -2.32135600 | -1.05332100 | 1.90795900  | C | -3.69449300 | 3.00522400  | -0.73119500 |
| H          | -2.07727000 | -2.73248700 | 3.61078800  | C | -4.78441800 | 3.36436900  | 0.06537900  |
| O          | -0.46726100 | -3.53730200 | 2.60515800  | C | -3.85822400 | 2.81099200  | -2.10540000 |
| N          | -0.43713200 | -1.73997800 | 1.27755700  | C | -6.04130600 | 3.51784400  | -0.50789600 |
| C          | -2.55591700 | -2.40049800 | 0.22667500  | H | -4.64397500 | 3.51591200  | 1.13563900  |
| H          | -2.40130600 | -1.61004000 | -0.52131600 | C | -5.12453900 | 2.95686200  | -2.66376700 |
| H          | -2.03339500 | -3.28815200 | -0.15861900 | H | -3.00250600 | 2.54980000  | -2.71963900 |
| C          | -4.01570600 | -2.69698200 | 0.41535400  | C | -6.21756400 | 3.30567500  | -1.87347800 |
| C          | -4.47753600 | -4.01642900 | 0.43443100  | H | -6.88545600 | 3.79980500  | 0.11764000  |
| C          | -4.93807400 | -1.66283400 | 0.61191700  | H | -5.25351500 | 2.80661200  | -3.73362900 |
| C          | -5.82524900 | -4.30033400 | 0.64201700  | H | -7.20146400 | 3.42203000  | -2.32206200 |
| H          | -3.76927100 | -4.83107200 | 0.26655000  | C | 0.76174700  | 3.72094900  | -1.15106700 |
| C          | -6.28466900 | -1.94211600 | 0.81995100  | F | -0.17839500 | 3.77339600  | -2.11350300 |
| H          | -4.59547700 | -0.62650000 | 0.59445100  | F | 1.93799100  | 4.06852500  | -1.71847000 |
| C          | -6.73160000 | -3.26221500 | 0.83699500  | F | 0.45123500  | 4.65616100  | -0.23930700 |
| H          | -6.16754100 | -5.33324900 | 0.64630300  | C | 4.66042600  | -0.37965700 | -1.22603300 |
| H          | -6.99053300 | -1.12638800 | 0.96468200  | C | 3.46821900  | 0.36039500  | -0.61413900 |
| H          | -7.78546300 | -3.47985700 | 0.99679700  | C | 2.74779900  | -1.45815900 | -1.67143300 |
|            |             |             |             | H | 5.31337300  | -0.83731700 | -0.47060300 |
|            |             |             |             | H | 3.33168400  | 1.33174400  | -1.11379000 |
|            |             |             |             | H | 5.26492300  | 0.21430200  | -1.91529700 |
|            |             |             |             | O | 4.05363900  | -1.45310400 | -1.98166300 |
|            |             |             |             | N | 2.31067200  | -0.49130200 | -0.94694000 |
|            |             |             |             | C | 3.57457000  | 0.55640400  | 0.89502000  |
|            |             |             |             | H | 2.60280200  | 0.92314300  | 1.26778500  |
|            |             |             |             | H | 3.71872600  | -0.43118400 | 1.35966800  |
|            |             |             |             | C | 4.68243400  | 1.49696900  | 1.27908200  |
|            |             |             |             | C | 5.74775700  | 1.06163800  | 2.07048900  |
|            |             |             |             | C | 4.67659500  | 2.82524000  | 0.83364700  |
|            |             |             |             | C | 6.77806900  | 1.93134700  | 2.42000400  |
|            |             |             |             | H | 5.76226700  | 0.02841400  | 2.42102300  |
|            |             |             |             | C | 5.70307000  | 3.69707200  | 1.18225800  |
|            |             |             |             | H | 3.86442000  | 3.18727500  | 0.19708900  |
|            |             |             |             | C | 6.75676600  | 3.25100400  | 1.97799900  |
|            |             |             |             | H | 7.59925200  | 1.57631400  | 3.03928600  |
|            |             |             |             | H | 5.68214600  | 4.72632200  | 0.82997300  |
|            |             |             |             | H | 7.56054700  | 3.93157800  | 2.25010000  |
|            |             |             |             | C | 2.03548100  | -2.63883800 | -2.27118500 |
|            |             |             |             | C | 2.84795500  | -3.90751300 | -1.85661700 |
|            |             |             |             | H | 3.79381700  | -3.89588500 | -2.40814300 |
|            |             |             |             | H | 2.28787200  | -4.79083600 | -2.18054500 |
|            |             |             |             | C | 2.01208900  | -2.42717400 | -3.82508300 |
|            |             |             |             | H | 3.05391100  | -2.41869300 | -4.16753400 |
|            |             |             |             | H | 1.52284300  | -3.30078700 | -4.27260500 |
|            |             |             |             | C | 3.10968300  | -3.91091600 | -0.37037500 |
|            |             |             |             | C | 4.38097500  | -3.59891300 | 0.12336300  |
|            |             |             |             | C | 2.07323500  | -4.11160300 | 0.55007400  |
| <b>TS5</b> |             |             |             |   |             |             |             |
| Cu         | 0.35531900  | -0.18521000 | -0.33798900 |   |             |             |             |
| C          | -2.71374800 | -1.03570900 | 2.22437700  |   |             |             |             |
| C          | -2.10759700 | -0.32041900 | 1.19046300  |   |             |             |             |
| C          | -0.73930700 | -0.07087900 | 1.23327700  |   |             |             |             |
| C          | 0.00620700  | -0.45993800 | 2.35158000  |   |             |             |             |
| C          | -0.61151400 | -1.18695900 | 3.36194900  |   |             |             |             |
| C          | -1.98250600 | -1.48989300 | 3.32611800  |   |             |             |             |
| H          | -3.77911400 | -1.24281000 | 2.13950300  |   |             |             |             |
| H          | -2.71656700 | -0.00505200 | 0.34661800  |   |             |             |             |
| H          | 1.06507600  | -0.21234700 | 2.43654900  |   |             |             |             |
| H          | -0.00891200 | -1.51155600 | 4.21072200  |   |             |             |             |
| C          | -2.61604400 | -2.26597900 | 4.47600300  |   |             |             |             |
| C          | -2.49418000 | -1.43746700 | 5.76242900  |   |             |             |             |
| H          | -3.01110400 | -0.47464200 | 5.66402900  |   |             |             |             |
| H          | -2.93992500 | -1.97437700 | 6.60892300  |   |             |             |             |
| H          | -1.44738100 | -1.22939800 | 6.01551000  |   |             |             |             |
| C          | -1.87491400 | -3.59753700 | 4.65931400  |   |             |             |             |
| H          | -2.32170300 | -4.17330100 | 5.47903600  |   |             |             |             |
| H          | -1.92842500 | -4.21079800 | 3.75043100  |   |             |             |             |
| H          | -0.81591100 | -3.44931700 | 4.90317800  |   |             |             |             |
| C          | -4.09232000 | -2.56646100 | 4.22091500  |   |             |             |             |
| H          | -4.50521800 | -3.14176400 | 5.05739500  |   |             |             |             |
| H          | -4.69018200 | -1.65138900 | 4.12758300  |   |             |             |             |
| H          | -4.23711000 | -3.15875900 | 3.30803300  |   |             |             |             |
| C          | 0.89848700  | 2.32059900  | -0.56971700 |   |             |             |             |
| H          | 0.93663100  | 1.67711700  | -1.46028700 |   |             |             |             |
| H          | 1.87386300  | 2.27652600  | -0.09132300 |   |             |             |             |

|           |             |             |             |            |                    |             |             |
|-----------|-------------|-------------|-------------|------------|--------------------|-------------|-------------|
| C         | 4.60748700  | -3.46756100 | 1.49158400  | H          | -7.54657800        | -0.34259000 | 0.07804700  |
| H         | 5.20116100  | -3.45723700 | -0.58032400 | H          | -6.37540600        | 0.87548600  | -0.44509200 |
| C         | 2.29171400  | -3.96977200 | 1.91750900  | H          | -6.41402300        | 0.34647000  | 1.24928400  |
| H         | 1.08310300  | -4.39733700 | 0.19524200  | C          | 0.31259900         | 1.13500500  | 1.83991400  |
| C         | 3.55896500  | -3.63831200 | 2.39302700  | H          | -0.26100400        | 2.06221800  | 1.93112700  |
| H         | 5.60860900  | -3.23779800 | 1.85375900  | H          | -0.09646600        | 0.43560900  | 2.57628400  |
| H         | 1.46934600  | -4.12853000 | 2.61363800  | C          | 0.11482400         | 0.51570600  | 0.43408200  |
| H         | 3.73278500  | -3.53459700 | 3.46222300  | C          | 0.28793900         | 1.50628100  | -0.72213700 |
| C         | 1.30476500  | -1.14580800 | -4.17548100 | C          | 0.47513000         | 2.88143600  | -0.56349000 |
| C         | -0.08144500 | -1.12390700 | -4.35746700 | C          | 0.16521800         | 1.00736500  | -2.02898300 |
| C         | 1.99712800  | 0.07084100  | -4.18005000 | C          | 0.55255300         | 3.72550500  | -1.67088500 |
| C         | -0.76397300 | 0.07961900  | -4.50712700 | H          | 0.57654300         | 3.31534200  | 0.42804400  |
| H         | -0.63072200 | -2.06766500 | -4.37090500 | C          | 0.25002400         | 1.84375600  | -3.13331800 |
| C         | 1.31800900  | 1.27840100  | -4.32412100 | H          | -0.00997400        | -0.05953800 | -2.17255000 |
| H         | 3.08226500  | 0.06778600  | -4.06087500 | C          | 0.44502000         | 3.21296000  | -2.95817800 |
| C         | -0.06722600 | 1.28482800  | -4.47639600 | H          | 0.70103500         | 4.79307000  | -1.51804500 |
| H         | -1.84596900 | 0.07803000  | -4.63108700 | H          | 0.15393300         | 1.42614800  | -4.13390100 |
| H         | 1.87003800  | 2.21792400  | -4.31721200 | H          | 0.50688000         | 3.87421000  | -3.82027300 |
| H         | -0.60012400 | 2.22858800  | -4.57334400 | C          | 1.10392000         | -0.68303400 | 0.39061700  |
| C         | -1.24204400 | -4.05083000 | -1.60161400 | O          | 0.89928700         | -1.67775300 | 1.07137300  |
| C         | -1.46978700 | -2.64772800 | -1.01980800 | N          | 2.22086200         | -0.48551700 | -0.37159500 |
| C         | 0.61332300  | -2.80947500 | -1.81404000 | H          | 2.28105900         | 0.40738700  | -0.84626100 |
| H         | -1.94058400 | -4.31744200 | -2.40115100 | C          | 3.35475100         | -1.30362700 | -0.50712200 |
| H         | -1.68979700 | -2.69158100 | 0.05665800  | C          | 4.38757200         | -0.81077500 | -1.31548500 |
| H         | -1.22768300 | -4.85346700 | -0.85533300 | C          | 3.49120900         | -2.55680000 | 0.10219700  |
| O         | 0.08314600  | -3.98809000 | -2.18760000 | C          | 5.54162900         | -1.55392100 | -1.51516000 |
| N         | -0.14758000 | -2.00551900 | -1.16870300 | H          | 4.27792300         | 0.16620100  | -1.78734300 |
| C         | -2.55770900 | -1.83501400 | -1.72593300 | C          | 4.65560500         | -3.28877000 | -0.10975700 |
| H         | -2.24076700 | -0.78631800 | -1.75728500 | H          | 2.69485400         | -2.93770600 | 0.72993500  |
| H         | -2.60580400 | -2.15336200 | -2.78052900 | C          | 5.68300900         | -2.80220000 | -0.91292500 |
| C         | -3.91868000 | -1.92396600 | -1.08764100 | H          | 6.33341000         | -1.15378100 | -2.14604700 |
| C         | -4.76416200 | -0.80886500 | -1.12572300 | H          | 4.75556100         | -4.26221900 | 0.36750300  |
| C         | -4.36339700 | -3.07301800 | -0.42715600 | H          | 6.58606800         | -3.38883700 | -1.06867900 |
| C         | -6.01620800 | -0.83866200 | -0.51960800 | C          | 1.72983500         | 1.43153600  | 2.28243400  |
| H         | -4.42026900 | 0.09966100  | -1.62477700 | F          | 1.71671100         | 2.27256100  | 3.33683700  |
| C         | -5.61825300 | -3.10892400 | 0.17795500  | F          | 2.38848000         | 0.32334500  | 2.66581200  |
| H         | -3.72422800 | -3.95671000 | -0.37423700 | F          | 2.48343100         | 2.01675400  | 1.32186800  |
| C         | -6.44714900 | -1.99063600 | 0.13662100  |            |                    |             |             |
| H         | -6.65241700 | 0.04431500  | -0.55639200 | <b>TS6</b> | <b>S**2 = 0.69</b> |             |             |
| H         | -5.94786300 | -4.01397900 | 0.68530200  | C          | -1.72328200        | -2.01259600 | 3.19382400  |
| H         | -7.42522300 | -2.01791700 | 0.61251900  | C          | -1.67414100        | -1.02130800 | 2.02784600  |
|           |             |             |             | C          | 0.16710900         | -2.26423500 | 2.01123900  |
| <b>4a</b> |             |             |             | H          | -2.57667500        | -2.69925900 | 3.14930700  |
| C         | -3.70606000 | 0.59413500  | 0.45636300  | H          | -1.71163000        | 0.01510500  | 2.38987400  |
| C         | -2.36648500 | 0.94359300  | 0.59042900  | H          | -1.69105700        | -1.54801900 | 4.18400000  |
| C         | -1.34166200 | 0.02710700  | 0.34331100  | O          | -0.51451600        | -2.79472300 | 3.04266000  |
| C         | -1.71089800 | -1.25609000 | -0.07002100 | N          | -0.35548000        | -1.25648500 | 1.41476400  |
| C         | -3.05097300 | -1.59610300 | -0.21080900 | C          | -2.73489700        | -1.24171500 | 0.95443800  |
| C         | -4.08293900 | -0.68827100 | 0.05114400  | H          | -2.50930800        | -0.53552000 | 0.14641500  |
| H         | -4.46217800 | 1.34879900  | 0.66214300  | H          | -2.58127900        | -2.24267900 | 0.52390000  |
| H         | -2.12099300 | 1.96951800  | 0.86706800  | C          | -4.14925300        | -1.08348700 | 1.42578900  |
| H         | -0.95231700 | -2.00910800 | -0.26283700 | C          | -4.96867600        | -2.20149800 | 1.60207100  |
| H         | -3.29661200 | -2.60850100 | -0.53295200 | C          | -4.68096900        | 0.18284100  | 1.69446300  |
| C         | -5.53724000 | -1.11948900 | -0.11865000 | C          | -6.28779300        | -2.06165900 | 2.02657900  |
| C         | -5.76981400 | -1.55544900 | -1.57152000 | H          | -4.56972000        | -3.19262300 | 1.37641800  |
| H         | -5.57380500 | -0.73161100 | -2.26894200 | C          | -5.99762000        | 0.32888400  | 2.11820100  |
| H         | -6.80910800 | -1.87982300 | -1.71442600 | H          | -4.05691900        | 1.06892800  | 1.55312900  |
| H         | -5.11969000 | -2.39241600 | -1.85383600 | C          | -6.80537500        | -0.79529400 | 2.28414900  |
| C         | -5.82744400 | -2.30358900 | 0.81287600  | H          | -6.91378200        | -2.94321200 | 2.15114700  |
| H         | -6.86716400 | -2.63758400 | 0.69790100  | H          | -6.39753000        | 1.32150000  | 2.31711300  |
| H         | -5.67429600 | -2.02904200 | 1.86386100  | H          | -7.83612000        | -0.68262300 | 2.61377700  |
| H         | -5.17756500 | -3.15972900 | 0.59570400  | C          | 1.46086400         | -2.97779000 | 1.76201500  |
| C         | -6.51532400 | 0.00685600  | 0.21070800  | C          | 1.14343500         | -4.49625000 | 1.58500200  |

|    |             |             |             |
|----|-------------|-------------|-------------|
| H  | 0.70631900  | -4.85068400 | 2.52496100  |
| H  | 2.10097900  | -5.01187900 | 1.45215700  |
| C  | 2.38683400  | -2.78668700 | 3.01026900  |
| H  | 1.78688600  | -3.03870000 | 3.89364000  |
| H  | 3.18413000  | -3.53510800 | 2.93881700  |
| C  | 0.22522400  | -4.76470800 | 0.42493800  |
| C  | -1.16308900 | -4.80160000 | 0.59538700  |
| C  | 0.74462000  | -4.93345700 | -0.86307100 |
| C  | -2.00865200 | -4.99552800 | -0.49385000 |
| H  | -1.58102500 | -4.69811500 | 1.59765800  |
| C  | -0.09716000 | -5.12645600 | -1.95422900 |
| H  | 1.82623500  | -4.93784500 | -1.00319900 |
| C  | -1.47751300 | -5.15479000 | -1.77171200 |
| H  | -3.08672800 | -5.03501900 | -0.34109200 |
| H  | 0.32527800  | -5.27000600 | -2.94667800 |
| H  | -2.13449300 | -5.32158900 | -2.62382000 |
| C  | 2.98170700  | -1.40849100 | 3.11551900  |
| C  | 4.35269300  | -1.21621200 | 2.91601400  |
| C  | 2.18354400  | -0.28625400 | 3.37228300  |
| C  | 4.91162600  | 0.05973700  | 2.96664500  |
| H  | 4.98696500  | -2.08154600 | 2.71757300  |
| C  | 2.73350800  | 0.99078200  | 3.39595300  |
| H  | 1.11826900  | -0.40654400 | 3.57014600  |
| C  | 4.10004500  | 1.16900800  | 3.18979700  |
| H  | 5.98328200  | 0.18761400  | 2.82348100  |
| H  | 2.08943600  | 1.84874200  | 3.58234600  |
| H  | 4.53272600  | 2.16759200  | 3.21848800  |
| C  | 3.94809900  | -2.69978400 | -0.84327500 |
| C  | 3.19849800  | -1.39970200 | -1.10735900 |
| C  | 2.21871300  | -2.49448100 | 0.55774500  |
| H  | 5.02149000  | -2.57194900 | -0.67459900 |
| H  | 2.91295900  | -1.30582100 | -2.15832000 |
| H  | 3.78767200  | -3.46836300 | -1.60825700 |
| O  | 3.35907300  | -3.18392300 | 0.38818900  |
| N  | 1.97870700  | -1.53908000 | -0.27186500 |
| C  | 3.97903800  | -0.16264600 | -0.64589500 |
| H  | 3.32079400  | 0.71020800  | -0.73275300 |
| H  | 4.19374900  | -0.28050000 | 0.42495100  |
| C  | 5.25202900  | 0.03729200  | -1.41703700 |
| C  | 6.48482800  | -0.29831200 | -0.84871500 |
| C  | 5.22872000  | 0.51996400  | -2.73021300 |
| C  | 7.66775900  | -0.15335900 | -1.56957800 |
| H  | 6.51320500  | -0.66793100 | 0.17842200  |
| C  | 6.40861700  | 0.66689800  | -3.45255000 |
| H  | 4.27655000  | 0.79281500  | -3.18570000 |
| C  | 7.63114900  | 0.32949400  | -2.87456700 |
| H  | 8.61895000  | -0.41424100 | -1.10960300 |
| H  | 6.37489000  | 1.04965400  | -4.47081200 |
| H  | 8.55332800  | 0.44651000  | -3.43985600 |
| Cu | 0.41580100  | -0.17730300 | -0.22998900 |
| C  | -0.94620400 | 3.10918600  | 1.96422300  |
| C  | -1.07878000 | 2.08104600  | 1.03300900  |
| C  | -0.02171900 | 1.71585800  | 0.19413900  |
| C  | 1.14716200  | 2.49190400  | 0.24504100  |
| C  | 1.28200700  | 3.51367200  | 1.18215300  |
| C  | 0.23866400  | 3.85199500  | 2.05829500  |
| H  | -1.79692000 | 3.35523500  | 2.59765600  |
| H  | -2.04200700 | 1.57355000  | 0.94219800  |
| H  | 1.97553500  | 2.29540200  | -0.43922300 |
| H  | 2.21965300  | 4.07041800  | 1.21912100  |
| C  | 0.41213900  | 5.02276700  | 3.02275700  |
| C  | 0.76913800  | 6.28516800  | 2.22544600  |
| H  | -0.01764600 | 6.53378000  | 1.50195200  |

|   |             |             |             |
|---|-------------|-------------|-------------|
| H | 0.88616600  | 7.14215000  | 2.89992100  |
| H | 1.70816200  | 6.17250700  | 1.67120300  |
| C | 1.55230100  | 4.70970200  | 4.00145000  |
| H | 1.72235100  | 5.55831900  | 4.67554200  |
| H | 1.31747000  | 3.83524300  | 4.62173700  |
| H | 2.49604900  | 4.51025000  | 3.47776600  |
| C | -0.85769500 | 5.30217100  | 3.82437400  |
| H | -0.69495400 | 6.15155600  | 4.49743700  |
| H | -1.70373500 | 5.55700200  | 3.17296600  |
| H | -1.15098400 | 4.44598900  | 4.44453200  |
| C | 0.13064500  | 2.35334200  | -2.91866600 |
| H | 0.74785100  | 3.07135800  | -2.35949600 |
| H | -0.17817100 | 2.89864000  | -3.82400600 |
| C | -1.11155900 | 2.03949500  | -2.12846000 |
| C | -1.96244700 | 3.25769200  | -2.02472900 |
| C | -1.59270300 | 4.31163000  | -1.17589800 |
| C | -3.06321000 | 3.45434400  | -2.88071300 |
| C | -2.34042900 | 5.48279700  | -1.12893300 |
| H | -0.71132600 | 4.20705700  | -0.54550800 |
| C | -3.80518200 | 4.63177900  | -2.83492000 |
| H | -3.31230700 | 2.69997400  | -3.62821900 |
| C | -3.45628500 | 5.64421300  | -1.94683000 |
| H | -2.04447000 | 6.27982800  | -0.44927100 |
| H | -4.64781100 | 4.76013300  | -3.51109100 |
| H | -4.03723400 | 6.56288400  | -1.90779700 |
| C | -1.66157800 | 0.67355900  | -2.02682100 |
| O | -0.94456400 | -0.34873700 | -1.92565600 |
| N | -3.02344000 | 0.59630300  | -2.00501500 |
| H | -3.51018100 | 1.48601100  | -1.99971600 |
| C | -3.87549200 | -0.52389900 | -2.01285200 |
| C | -5.23473600 | -0.26451400 | -1.78596600 |
| C | -3.44066800 | -1.83484600 | -2.24297900 |
| C | -6.15448100 | -1.30193700 | -1.77900000 |
| H | -5.56297200 | 0.75793300  | -1.59612000 |
| C | -4.38015300 | -2.86113400 | -2.23918500 |
| H | -2.38943300 | -2.04015300 | -2.41281400 |
| C | -5.73044500 | -2.60922600 | -2.00768300 |
| H | -7.20325500 | -1.08730200 | -1.58637500 |
| H | -4.04500300 | -3.87870100 | -2.43075500 |
| H | -6.44893000 | -3.42579800 | -2.00836400 |
| C | 1.04782800  | 1.27191900  | -3.41447700 |
| F | 1.66448200  | 0.60347800  | -2.39839800 |
| F | 2.03990000  | 1.83316700  | -4.13598100 |
| F | 0.44689300  | 0.37022800  | -4.19436800 |

## TS7

|   |             |             |             |
|---|-------------|-------------|-------------|
| C | -1.26912200 | -3.54064900 | -1.87114900 |
| C | -1.42118600 | -2.56504000 | -0.69560200 |
| C | 0.12316700  | -1.79487400 | -2.10054600 |
| H | -2.16880800 | -3.60788000 | -2.49748700 |
| H | -1.07021400 | -3.01648800 | 0.24175500  |
| H | -0.96009200 | -4.54994800 | -1.58556300 |
| O | -0.21196000 | -2.97108700 | -2.67824100 |
| N | -0.49379800 | -1.47123200 | -1.02558000 |
| C | -2.84423700 | -2.05656700 | -0.48990000 |
| H | -2.80627800 | -1.28598600 | 0.29047800  |
| H | -3.18470600 | -1.56064800 | -1.41068700 |
| C | -3.76829700 | -3.17776400 | -0.10995800 |
| C | -4.70124600 | -3.68947900 | -1.01600700 |
| C | -3.66562000 | -3.77268600 | 1.15361000  |
| C | -5.51380300 | -4.76811000 | -0.67309400 |
| H | -4.79650400 | -3.22756600 | -2.00043700 |
| C | -4.47501500 | -4.84961200 | 1.49802500  |

|    |             |             |             |
|----|-------------|-------------|-------------|
| H  | -2.94660500 | -3.37390200 | 1.86999800  |
| C  | -5.40050900 | -5.35258300 | 0.58476400  |
| H  | -6.23716300 | -5.15138200 | -1.39099400 |
| H  | -4.38513600 | -5.29859900 | 2.48593000  |
| H  | -6.03307700 | -6.19625600 | 0.85509100  |
| C  | 1.13577000  | -1.01913400 | -2.89828500 |
| C  | 0.40490800  | -0.45750600 | -4.16312500 |
| H  | 0.00991600  | -1.31432000 | -4.72393200 |
| H  | 1.17110400  | 0.02118200  | -4.78545700 |
| C  | 2.30584200  | -1.95178200 | -3.33960100 |
| H  | 1.86738100  | -2.88328500 | -3.71608800 |
| H  | 2.80431500  | -1.46523000 | -4.18609200 |
| C  | -0.67876200 | 0.51685800  | -3.80167200 |
| C  | -1.98182100 | 0.08550500  | -3.53942200 |
| C  | -0.37131100 | 1.86854300  | -3.60755100 |
| C  | -2.94631400 | 0.97323700  | -3.06862100 |
| H  | -2.23467600 | -0.96637900 | -3.69302500 |
| C  | -1.33324200 | 2.75792300  | -3.14240600 |
| H  | 0.63976900  | 2.21835800  | -3.82155600 |
| C  | -2.62105800 | 2.30994100  | -2.86237000 |
| H  | -3.95315900 | 0.61830500  | -2.85134300 |
| H  | -1.07514300 | 3.80375400  | -2.98058200 |
| H  | -3.36202500 | 2.99910400  | -2.46104700 |
| C  | 3.31868600  | -2.21180100 | -2.25356800 |
| C  | 4.64949800  | -1.82267100 | -2.43874600 |
| C  | 2.95987400  | -2.78992400 | -1.03051100 |
| C  | 5.60144000  | -2.02409200 | -1.44286200 |
| H  | 4.93631900  | -1.34924900 | -3.37858800 |
| C  | 3.90518200  | -2.97861600 | -0.02638300 |
| H  | 1.92847400  | -3.08583000 | -0.84081800 |
| C  | 5.23030200  | -2.60075200 | -0.23032700 |
| H  | 6.63440600  | -1.72224100 | -1.61238500 |
| H  | 3.59410500  | -3.41060900 | 0.92246900  |
| H  | 5.96897700  | -2.74548700 | 0.55594800  |
| C  | 3.21037100  | 1.80687300  | -1.98067600 |
| C  | 2.58446300  | 1.49166100  | -0.61825200 |
| C  | 1.75624800  | 0.11986500  | -2.14075700 |
| H  | 4.30521300  | 1.77714900  | -1.98599500 |
| H  | 2.13091500  | 2.37162900  | -0.14793000 |
| H  | 2.87164400  | 2.75494000  | -2.41612100 |
| O  | 2.73537600  | 0.73802700  | -2.83963000 |
| N  | 1.52916600  | 0.51970000  | -0.94723600 |
| C  | 3.56010300  | 0.83135000  | 0.36381700  |
| H  | 2.98011500  | 0.51329800  | 1.23824100  |
| H  | 3.95623300  | -0.07929000 | -0.10978600 |
| C  | 4.67977600  | 1.74967200  | 0.75416300  |
| C  | 5.95592900  | 1.59894600  | 0.20326100  |
| C  | 4.45577300  | 2.80441200  | 1.64725000  |
| C  | 6.98578500  | 2.47744400  | 0.53180500  |
| H  | 6.13915400  | 0.76835600  | -0.48189600 |
| C  | 5.48281700  | 3.68224000  | 1.97778800  |
| H  | 3.46495600  | 2.91636600  | 2.08890600  |
| C  | 6.75042900  | 3.52349500  | 1.41929400  |
| H  | 7.97497400  | 2.34190100  | 0.09691500  |
| H  | 5.29656100  | 4.49309800  | 2.68078200  |
| H  | 7.55366600  | 4.21055900  | 1.68087200  |
| Cu | -0.36162900 | 0.32616300  | -0.03653500 |
| S  | 0.18514300  | -1.53350100 | 2.43133600  |
| O  | 0.89377800  | -2.52986900 | 1.65101700  |
| O  | -1.27577900 | -1.48462200 | 2.42425600  |
| O  | 0.81524900  | -0.12991500 | 2.17113100  |
| C  | 0.68837100  | -1.84587500 | 4.18426100  |
| F  | 2.01042700  | -1.75517100 | 4.29844600  |

|   |             |             |             |
|---|-------------|-------------|-------------|
| F | 0.30042600  | -3.08333400 | 4.49807900  |
| F | 0.10789000  | -0.98192300 | 5.00810900  |
| C | -3.88502800 | 2.36541200  | 0.91332900  |
| C | -2.87740200 | 1.41562100  | 1.01026900  |
| C | -1.53752700 | 1.68741400  | 0.66222000  |
| C | -1.29229900 | 3.00872400  | 0.24948800  |
| C | -2.29571000 | 3.97492800  | 0.15358100  |
| C | -3.62111800 | 3.67235200  | 0.47423200  |
| H | -4.90479200 | 2.08962800  | 1.19016200  |
| H | -3.14431300 | 0.42090400  | 1.38052900  |
| H | -0.27391000 | 3.29510100  | -0.03218400 |
| H | -2.03368400 | 4.97629900  | -0.18941900 |
| B | 0.03515600  | 1.18636400  | 2.29279000  |
| O | -0.88421900 | 1.27662400  | 3.31090300  |
| H | -1.59978100 | 0.63529200  | 3.21026900  |
| O | 0.96538000  | 2.18963100  | 2.09822300  |
| H | 0.51391200  | 3.03157000  | 2.24512600  |
| C | -4.75840100 | 4.68756800  | 0.38510500  |
| C | -4.29448700 | 6.02378300  | -0.19123400 |
| H | -3.87529200 | 5.90696800  | -1.19960200 |
| H | -5.14155800 | 6.71743600  | -0.26180000 |
| H | -3.53106400 | 6.49837700  | 0.43779600  |
| C | -5.32890700 | 4.93067900  | 1.78898200  |
| H | -6.15609900 | 5.65270300  | 1.75351100  |
| H | -5.71282900 | 4.00367600  | 2.23199300  |
| H | -4.56103700 | 5.32727100  | 2.46456200  |
| C | -5.87382600 | 4.13871600  | -0.51476300 |
| H | -6.70972100 | 4.84911500  | -0.56927000 |
| H | -5.51370700 | 3.96777300  | -1.53773000 |
| H | -6.27132900 | 3.18833600  | -0.13972000 |

## INT8

|   |            |             |             |
|---|------------|-------------|-------------|
| C | 4.30778400 | -0.90132800 | -0.37152000 |
| C | 3.22597600 | 0.03915100  | -0.91683800 |
| C | 2.27763200 | -1.53621700 | 0.34420200  |
| H | 4.97907000 | -0.41118100 | 0.34586600  |
| H | 3.12961500 | -0.05559100 | -2.00847100 |
| H | 4.90823900 | -1.39897400 | -1.13785300 |
| O | 3.57370800 | -1.92241000 | 0.34546600  |
| N | 1.98495700 | -0.47129900 | -0.31103700 |
| C | 3.43521100 | 1.51031900  | -0.55898500 |
| H | 2.56100400 | 2.06894000  | -0.92848100 |
| H | 3.41848400 | 1.60143400  | 0.53657400  |
| C | 4.71995400 | 2.04640200  | -1.12066700 |
| C | 5.82192500 | 2.28194100  | -0.29297900 |
| C | 4.85698600 | 2.28241300  | -2.49378000 |
| C | 7.02653000 | 2.74418100  | -0.81744900 |
| H | 5.72389600 | 2.11012900  | 0.78051700  |
| C | 6.05806600 | 2.74382000  | -3.02174900 |
| H | 4.00323200 | 2.11463100  | -3.15189200 |
| C | 7.14804700 | 2.97529700  | -2.18447700 |
| H | 7.87078700 | 2.92826800  | -0.15491600 |
| H | 6.14273000 | 2.92988800  | -4.09123800 |
| H | 8.08695400 | 3.34029700  | -2.59663900 |
| C | 1.41151800 | -2.35784500 | 1.26098400  |
| C | 1.83225700 | -1.99156800 | 2.72146400  |
| H | 2.80315600 | -2.46653400 | 2.91130200  |
| H | 1.10209500 | -2.45999300 | 3.39219600  |
| C | 1.65683600 | -3.88131000 | 1.04300500  |
| H | 2.73514200 | -4.05997400 | 1.12828200  |
| H | 1.17141200 | -4.40191400 | 1.87821900  |
| C | 1.93425600 | -0.51059100 | 2.95471100  |
| C | 3.18416000 | 0.08719700  | 3.14248800  |

|    |             |             |             |                             |             |             |             |
|----|-------------|-------------|-------------|-----------------------------|-------------|-------------|-------------|
| C  | 0.80301600  | 0.31170100  | 2.89631900  | H                           | -4.61949300 | 6.97058100  | -0.98769100 |
| C  | 3.30329600  | 1.46916200  | 3.27429000  | H                           | -2.94865500 | 6.61335500  | -0.51207500 |
| H  | 4.07323700  | -0.54402600 | 3.18837700  | H                           | -3.56104200 | 6.04108600  | -2.07137100 |
| C  | 0.91986300  | 1.69391200  | 3.00753400  |                             |             |             |             |
| H  | -0.18434900 | -0.13029500 | 2.75872300  | <b>TfOB(OH)<sub>2</sub></b> |             |             |             |
| C  | 2.17076700  | 2.27694500  | 3.19616100  | S                           | 0.19075900  | -0.66711900 | -0.00004800 |
| H  | 4.28390400  | 1.91625200  | 3.43372900  | O                           | 0.15913600  | -1.35619000 | -1.27052900 |
| H  | 0.02880900  | 2.31389500  | 2.93186900  | O                           | 0.15945400  | -1.35669800 | 1.27016200  |
| H  | 2.26157800  | 3.35828600  | 3.28147700  | O                           | -0.85652000 | 0.57109300  | 0.00034000  |
| C  | 1.12112200  | -4.38615000 | -0.26594100 | C                           | 1.67770400  | 0.42794000  | -0.00003200 |
| C  | -0.14971400 | -4.96522600 | -0.33251900 | F                           | 1.68610600  | 1.19063600  | -1.08627600 |
| C  | 1.84724200  | -4.22941200 | -1.45046500 | F                           | 2.75000800  | -0.35986900 | -0.00053900 |
| C  | -0.68271900 | -5.37831300 | -1.55004400 | F                           | 1.68661700  | 1.18996100  | 1.08668800  |
| H  | -0.72315000 | -5.09175900 | 0.58749400  | B                           | -2.24450600 | 0.36661900  | 0.00017200  |
| C  | 1.31633100  | -4.63944500 | -2.66976500 | O                           | -2.95466400 | 1.52225100  | 0.00021800  |
| H  | 2.84470900  | -3.78978000 | -1.40993700 | H                           | -3.90991500 | 1.40495300  | 0.00047400  |
| C  | 0.04825800  | -5.21268900 | -2.72367600 | O                           | -2.68823700 | -0.91636500 | -0.00004600 |
| H  | -1.67334800 | -5.83087400 | -1.58228000 | H                           | -3.64385600 | -1.03105200 | -0.00037900 |
| H  | 1.89696300  | -4.51443100 | -3.58227200 |                             |             |             |             |
| H  | -0.36632200 | -5.53504300 | -3.67690800 | <b>TS8 S**2 = 2.00</b>      |             |             |             |
| C  | -2.20261000 | -2.38185900 | 1.61610900  | Cu                          | 0.06970200  | -0.92074100 | -0.86255300 |
| C  | -2.06078600 | -1.50510700 | 0.36045700  | C                           | -3.60005200 | -0.70620800 | -2.89040700 |
| C  | -0.05492500 | -2.09678600 | 1.05907200  | C                           | -2.23296800 | -0.53383900 | -2.65151500 |
| H  | -2.68064700 | -3.34993700 | 1.40966900  | C                           | -1.46005200 | -1.45795700 | -1.92813000 |
| H  | -2.36792000 | -0.46486400 | 0.55489100  | C                           | -2.15510400 | -2.61636100 | -1.52217200 |
| H  | -2.72106700 | -1.90329700 | 2.45207100  | C                           | -3.52071300 | -2.78851400 | -1.73455800 |
| O  | -0.84001400 | -2.63976200 | 2.03157000  | C                           | -4.28576800 | -1.82093700 | -2.40041800 |
| N  | -0.61839800 | -1.47827200 | 0.09594800  | H                           | -4.14417200 | 0.06923400  | -3.43118000 |
| C  | -2.83943100 | -2.02805800 | -0.84281000 | H                           | -1.77284200 | 0.40044400  | -2.98915400 |
| H  | -2.55069800 | -1.42455000 | -1.71460800 | H                           | -1.62572400 | -3.39665100 | -0.96389600 |
| H  | -2.51498700 | -3.05734100 | -1.05597500 | H                           | -4.01298500 | -3.68582600 | -1.34927300 |
| C  | -4.32485600 | -1.97204200 | -0.61960800 | C                           | -5.80080300 | -1.98494400 | -2.49453800 |
| C  | -5.09856600 | -3.13404800 | -0.56704700 | C                           | -6.14675800 | -3.30731600 | -3.18967300 |
| C  | -4.95978700 | -0.73760100 | -0.43300400 | H                           | -5.72897900 | -4.16921700 | -2.65531300 |
| C  | -6.47316500 | -3.06934200 | -0.34665700 | H                           | -7.23547200 | -3.44559400 | -3.24273300 |
| H  | -4.61434500 | -4.10199500 | -0.71115600 | H                           | -5.75240800 | -3.33002900 | -4.21334600 |
| C  | -6.33081100 | -0.66976900 | -0.21380100 | C                           | -6.46091100 | -0.84505900 | -3.26831000 |
| H  | -4.36879800 | 0.17980400  | -0.46358900 | H                           | -7.54576400 | -1.00387700 | -3.31891200 |
| C  | -7.09349100 | -1.83598900 | -0.17134400 | H                           | -6.29143100 | 0.12497500  | -2.78298400 |
| H  | -7.06032100 | -3.98588900 | -0.31446500 | H                           | -6.08575000 | -0.78064400 | -4.29777700 |
| H  | -6.80677400 | 0.30063500  | -0.07834600 | C                           | -6.37894500 | -1.99632100 | -1.07083300 |
| H  | -8.16763300 | -1.78252800 | -0.00192000 | H                           | -7.46905200 | -2.13535700 | -1.09164300 |
| Cu | 0.33900100  | 0.61127200  | -0.34437600 | H                           | -5.94761300 | -2.80895200 | -0.47139500 |
| C  | -3.28549100 | 2.64785400  | -1.07108300 | H                           | -6.16694000 | -1.05115400 | -0.55148800 |
| C  | -2.22995800 | 1.73277400  | -1.06634700 | C                           | 1.63987000  | 1.07688800  | -2.65082700 |
| C  | -1.00619700 | 1.95704800  | -0.40588900 | C                           | 2.74997500  | 2.98606400  | -1.37028500 |
| C  | -0.92262100 | 3.21169800  | 0.23596600  | C                           | 3.78939100  | 3.83616700  | -1.03114400 |
| C  | -1.96640200 | 4.13285300  | 0.24158700  | C                           | 4.99504400  | 3.70868200  | -1.71823100 |
| C  | -3.18201300 | 3.87159700  | -0.40526800 | C                           | 5.11758300  | 2.75595500  | -2.72370100 |
| H  | -4.20084500 | 2.39278800  | -1.60747900 | C                           | 4.04864400  | 1.92013300  | -3.03209400 |
| H  | -2.37844600 | 0.79645700  | -1.61493400 | C                           | 2.83094200  | 2.00122100  | -2.34489000 |
| H  | 0.00096000  | 3.48587900  | 0.75537200  | H                           | 3.68654300  | 4.57150900  | -0.24007200 |
| H  | -1.83374400 | 5.08553900  | 0.76112200  | H                           | 5.83110000  | 4.35419600  | -1.45736400 |
| C  | -4.30721000 | 4.90360000  | -0.36472700 | H                           | 6.05426800  | 2.65485500  | -3.26861700 |
| C  | -4.68791100 | 5.19098900  | 1.09379400  | H                           | 4.16180400  | 1.17581000  | -3.81820200 |
| H  | -3.83428900 | 5.57326100  | 1.66648400  | I                           | 0.85900900  | 3.08177700  | -0.33985500 |
| H  | -5.48808800 | 5.94228700  | 1.14686800  | O                           | 0.89311200  | 0.88752500  | -1.47680400 |
| H  | -5.04284600 | 4.28174600  | 1.59558200  | C                           | 0.78481900  | 1.73620700  | -3.74259900 |
| C  | -5.55781000 | 4.42333900  | -1.09928200 | H                           | 1.36700400  | 1.93689700  | -4.65161300 |
| H  | -6.34550200 | 5.18530700  | -1.04032600 | H                           | -0.04591900 | 1.07001500  | -4.00167800 |
| H  | -5.35933200 | 4.23270200  | -2.16144300 | H                           | 0.36376600  | 2.68780000  | -3.39447700 |
| H  | -5.95699500 | 3.49847500  | -0.66187800 | C                           | 2.12948200  | -0.28373600 | -3.14496500 |
| C  | -3.83102700 | 6.20588800  | -1.02081000 | H                           | 1.26240500  | -0.95083100 | -3.22580700 |

|   |             |             |             |
|---|-------------|-------------|-------------|
| H | 2.61310300  | -0.22445900 | -4.12870200 |
| H | 2.83975800  | -0.71919900 | -2.43146900 |
| C | 1.42200000  | 5.35359600  | 0.52432600  |
| F | 0.26476400  | 5.73801000  | 1.09051100  |
| F | 1.75386300  | 6.25245800  | -0.41303900 |
| F | 2.37098200  | 5.37739300  | 1.48089400  |
| C | -1.82855500 | 1.94836300  | 2.02835100  |
| C | -1.94502400 | 1.08944000  | 0.75784700  |
| C | -0.37642000 | 0.24775900  | 2.06377000  |
| H | -2.76760700 | 2.03057000  | 2.58800300  |
| H | -1.83043000 | 1.67916700  | -0.16416200 |
| H | -1.42393400 | 2.95665800  | 1.86372500  |
| O | -0.88314200 | 1.22577900  | 2.85822300  |
| N | -0.82566500 | 0.15058400  | 0.87535500  |
| C | -3.24530800 | 0.28173600  | 0.68633600  |
| H | -3.14449100 | -0.44306700 | -0.13369100 |
| H | -3.32914400 | -0.29746500 | 1.61516600  |
| C | -4.46370600 | 1.13545300  | 0.49580300  |
| C | -5.41584500 | 1.26748200  | 1.51091300  |
| C | -4.67666100 | 1.81496100  | -0.71012800 |
| C | -6.55864900 | 2.04307500  | 1.32556600  |
| H | -5.26004400 | 0.73321500  | 2.45025000  |
| C | -5.81562600 | 2.59078700  | -0.89858400 |
| H | -3.94901000 | 1.70428000  | -1.51512100 |
| C | -6.76265900 | 2.70530400  | 0.11850500  |
| H | -7.29375500 | 2.12550900  | 2.12482700  |
| H | -5.97061100 | 3.10219100  | -1.84775700 |
| H | -7.65700600 | 3.30750800  | -0.03174000 |
| C | 0.53317600  | -0.70270200 | 2.78748900  |
| C | -0.32339200 | -1.29149000 | 3.95893400  |
| H | -0.38256200 | -0.51320800 | 4.72920800  |
| H | 0.25126100  | -2.12273800 | 4.38643500  |
| C | 1.77156000  | 0.02229200  | 3.41755900  |
| H | 1.46269300  | 1.05338900  | 3.63867600  |
| H | 1.97165300  | -0.45373800 | 4.38592600  |
| C | -1.71803900 | -1.72123300 | 3.58409700  |
| C | -2.81573800 | -1.14900400 | 4.23565400  |
| C | -1.96309200 | -2.66579100 | 2.57915600  |
| C | -4.11852200 | -1.51883100 | 3.90935400  |
| H | -2.63977200 | -0.39884300 | 5.00762300  |
| C | -3.26408600 | -3.02111000 | 2.23433100  |
| H | -1.13024600 | -3.12388300 | 2.04507000  |
| C | -4.34722400 | -2.45172500 | 2.90048300  |
| H | -4.95736900 | -1.06700200 | 4.43726800  |
| H | -3.43121300 | -3.73552000 | 1.42999700  |
| H | -5.36461400 | -2.72408400 | 2.62493600  |
| C | 3.03865100  | -0.00887100 | 2.60148300  |
| C | 4.22207900  | -0.46487600 | 3.19092400  |
| C | 3.06832300  | 0.36326300  | 1.25176800  |
| C | 5.40808900  | -0.53579400 | 2.46468700  |
| H | 4.20702800  | -0.77777100 | 4.23567600  |
| C | 4.25272500  | 0.29326800  | 0.52213400  |
| H | 2.15306600  | 0.66515200  | 0.73964700  |
| C | 5.42647100  | -0.15447600 | 1.12518900  |
| H | 6.31679000  | -0.89345000 | 2.94628400  |
| H | 4.25106900  | 0.58525900  | -0.52795800 |
| H | 6.35032300  | -0.20790400 | 0.55124500  |
| C | 2.44039700  | -3.55058800 | 1.69636200  |
| C | 1.77669500  | -3.21191000 | 0.36319000  |
| C | 1.05571400  | -1.81877300 | 1.92637700  |
| H | 3.48997700  | -3.22046800 | 1.73660200  |
| H | 1.01935300  | -3.96749700 | 0.09420500  |
| H | 2.37758900  | -4.59902300 | 1.99589700  |

|   |            |             |             |
|---|------------|-------------|-------------|
| O | 1.70065300 | -2.76312500 | 2.65600900  |
| N | 1.06250700 | -1.95517300 | 0.65027400  |
| C | 2.74858000 | -3.04874300 | -0.79846600 |
| H | 2.15792300 | -2.79448000 | -1.69058500 |
| H | 3.39483900 | -2.18523100 | -0.58124000 |
| C | 3.57440500 | -4.28439400 | -1.01446200 |
| C | 4.89785800 | -4.34648000 | -0.56682800 |
| C | 3.01911600 | -5.41845900 | -1.61802100 |
| C | 5.64916900 | -5.50941400 | -0.71852500 |
| H | 5.34180500 | -3.46458500 | -0.10092500 |
| C | 3.76694900 | -6.58140700 | -1.77150100 |
| H | 1.99072200 | -5.38038500 | -1.98009100 |
| C | 5.08472900 | -6.63075400 | -1.32032600 |
| H | 6.67980600 | -5.53794700 | -0.36849900 |
| H | 3.32125400 | -7.45204400 | -2.24965600 |
| H | 5.67087500 | -7.53974200 | -1.44260400 |

### INT9 S\*\*2 = 0.75

|    |             |             |             |
|----|-------------|-------------|-------------|
| Cu | -0.15529500 | 0.25603200  | 0.26567300  |
| C  | -1.81680600 | -3.76058100 | 0.36080500  |
| C  | -1.37688300 | -2.51192600 | 0.81368900  |
| C  | -0.74001700 | -1.60163500 | -0.03215500 |
| C  | -0.54506800 | -2.01168400 | -1.36014000 |
| C  | -0.97231600 | -3.25736800 | -1.81260900 |
| C  | -1.62489600 | -4.16166500 | -0.96373200 |
| H  | -2.31092100 | -4.42820200 | 1.06705500  |
| H  | -1.54135500 | -2.26620900 | 1.86667500  |
| H  | -0.04848800 | -1.34538200 | -2.07286500 |
| H  | -0.79429100 | -3.53062900 | -2.85589900 |
| C  | -2.08233200 | -5.51434100 | -1.50596400 |
| C  | -3.04306100 | -5.29559100 | -2.68249600 |
| H  | -2.56600300 | -4.73435300 | -3.49577000 |
| H  | -3.37810900 | -6.25693000 | -3.09521800 |
| H  | -3.93227300 | -4.73425900 | -2.36780200 |
| C  | -2.80201300 | -6.34896300 | -0.44809000 |
| H  | -3.12189400 | -7.30645100 | -0.87813200 |
| H  | -2.15214500 | -6.57162700 | 0.40724300  |
| H  | -3.69745500 | -5.84089200 | -0.06750800 |
| C  | -0.86258600 | -6.30439700 | -1.99809300 |
| H  | -1.16757200 | -7.27907700 | -2.40304500 |
| H  | -0.32645600 | -5.76721400 | -2.78991000 |
| H  | -0.15294600 | -6.48310400 | -1.18087700 |
| C  | 1.58729800  | 0.18840000  | 2.60462100  |
| C  | 3.72635800  | -1.26102700 | 2.28360600  |
| C  | 5.05380800  | -1.56356800 | 2.58597700  |
| C  | 5.75042100  | -0.82623400 | 3.53737500  |
| C  | 5.10475900  | 0.21671800  | 4.18740800  |
| C  | 3.77977400  | 0.50438300  | 3.87824600  |
| C  | 3.04322900  | -0.21056500 | 2.92103400  |
| H  | 5.54813700  | -2.37942400 | 2.06380200  |
| H  | 6.78775500  | -1.07120100 | 3.75927600  |
| H  | 5.62568000  | 0.81093400  | 4.93646200  |
| H  | 3.29701900  | 1.32633200  | 4.40053500  |
| I  | 2.88171100  | -2.51165700 | 0.75734700  |
| O  | 1.47469500  | 0.36673900  | 1.22994200  |
| C  | 0.64112100  | -0.89029700 | 3.15181000  |
| H  | 0.76289700  | -1.01673600 | 4.23596500  |
| H  | -0.39794200 | -0.58565100 | 2.95684600  |
| H  | 0.79710700  | -1.85712300 | 2.66401400  |
| C  | 1.19059700  | 1.51762000  | 3.26649300  |
| H  | 0.16881200  | 1.75145000  | 2.93798500  |
| H  | 1.19325100  | 1.49452300  | 4.36506100  |
| H  | 1.84420700  | 2.33228300  | 2.92672000  |

|   |             |             |             |
|---|-------------|-------------|-------------|
| C | 2.14567300  | 3.32618200  | -1.96469300 |
| C | 2.02244500  | 2.06381100  | -1.09714600 |
| C | -0.00482700 | 2.77140100  | -1.65862000 |
| H | 2.63479200  | 3.14136900  | -2.93010600 |
| H | 2.35976100  | 2.22645300  | -0.06412900 |
| H | 2.63791300  | 4.17215800  | -1.47573100 |
| O | 0.77292000  | 3.71963000  | -2.23543400 |
| N | 0.57881200  | 1.82794100  | -1.03206600 |
| C | 2.75020700  | 0.83932600  | -1.64462200 |
| H | 2.39544400  | -0.02811000 | -1.06940400 |
| H | 2.45940400  | 0.68465700  | -2.69523100 |
| C | 4.23817100  | 0.98026600  | -1.50534500 |
| C | 5.07431600  | 1.15966600  | -2.60904900 |
| C | 4.80561800  | 0.96645500  | -0.22534400 |
| C | 6.44953900  | 1.31538200  | -2.44261800 |
| H | 4.64248800  | 1.16495100  | -3.61165200 |
| C | 6.17707300  | 1.11827600  | -0.05624000 |
| H | 4.15250000  | 0.81759500  | 0.63674300  |
| C | 7.00363200  | 1.29498800  | -1.16580200 |
| H | 7.08923700  | 1.44891300  | -3.31387000 |
| H | 6.60052400  | 1.09074200  | 0.94693300  |
| H | 8.07825000  | 1.41212600  | -1.03510500 |
| C | -1.47492000 | 2.98502000  | -1.87433500 |
| C | -1.76968600 | 2.85877500  | -3.39924500 |
| H | -1.21218900 | 3.65789700  | -3.90350200 |
| H | -2.83800500 | 3.06224500  | -3.54087500 |
| C | -1.87405300 | 4.41299900  | -1.38232600 |
| H | -1.13962100 | 5.11827000  | -1.78897900 |
| H | -2.84522800 | 4.65444900  | -1.83053200 |
| C | -1.40335400 | 1.51285800  | -3.96076000 |
| C | -0.13457700 | 1.28784000  | -4.50374200 |
| C | -2.30530400 | 0.44453200  | -3.90262300 |
| C | 0.22255200  | 0.03047500  | -4.98365600 |
| H | 0.57535500  | 2.11524900  | -4.55677800 |
| C | -1.95102600 | -0.81378700 | -4.37933500 |
| H | -3.29896500 | 0.60812000  | -3.48296700 |
| C | -0.68596300 | -1.02335700 | -4.92318300 |
| H | 1.21326200  | -0.12586500 | -5.40767400 |
| H | -2.66186500 | -1.63641000 | -4.31746900 |
| H | -0.40736300 | -2.00783100 | -5.29529300 |
| C | -1.96818200 | 4.50270900  | 0.11652200  |
| C | -3.22209400 | 4.52780100  | 0.73600900  |
| C | -0.82545500 | 4.47836100  | 0.92458600  |
| C | -3.33655200 | 4.52585500  | 2.12377300  |
| H | -4.11767300 | 4.54534400  | 0.11408000  |
| C | -0.93634900 | 4.47517800  | 2.31207900  |
| H | 0.16396600  | 4.46641500  | 0.46431600  |
| C | -2.19174900 | 4.49368000  | 2.91647100  |
| H | -4.32265000 | 4.55415600  | 2.58585200  |
| H | -0.03704400 | 4.45481600  | 2.92444100  |
| H | -2.27527000 | 4.48923000  | 4.00159900  |
| C | -4.33556400 | 1.31318900  | -0.40835100 |
| C | -3.22023400 | 0.46337800  | 0.21032600  |
| C | -2.32600800 | 2.00313700  | -1.11919100 |
| H | -4.84159400 | 1.95302500  | 0.32880100  |
| H | -3.23211000 | -0.57094100 | -0.16637800 |
| H | -5.08525600 | 0.74901200  | -0.96931200 |
| O | -3.64812300 | 2.18360600  | -1.34149000 |
| N | -1.99082800 | 1.09332600  | -0.28501000 |
| C | -3.22322200 | 0.44007300  | 1.73585000  |
| H | -2.33666100 | -0.13073700 | 2.05376400  |
| H | -3.08751300 | 1.46947200  | 2.10186300  |
| C | -4.48424500 | -0.16218800 | 2.28550300  |

|   |             |             |            |
|---|-------------|-------------|------------|
| C | -5.41221900 | 0.61877300  | 2.97933900 |
| C | -4.77360100 | -1.51552200 | 2.07017300 |
| C | -6.59825600 | 0.06466700  | 3.45608100 |
| H | -5.19189700 | 1.67347600  | 3.15409200 |
| C | -5.95699600 | -2.07080500 | 2.54499400 |
| H | -4.05438500 | -2.13490500 | 1.53002900 |
| C | -6.87346200 | -1.28237300 | 3.23941600 |
| H | -7.30734500 | 0.68697900  | 3.99966100 |
| H | -6.16416600 | -3.12619500 | 2.37534200 |
| H | -7.79838000 | -1.71874400 | 3.61224900 |

**INT6-R S\*\*2 = 2.00**

|   |             |             |             |
|---|-------------|-------------|-------------|
| C | -2.28077800 | -3.45668800 | 2.06315100  |
| C | -2.09123900 | -2.02321400 | 1.55868500  |
| C | -0.33301400 | -3.26160100 | 0.97051400  |
| H | -3.20132600 | -3.93138900 | 1.70833200  |
| H | -2.15430300 | -1.28476300 | 2.36862100  |
| H | -2.21056500 | -3.56714800 | 3.15024800  |
| O | -1.16026300 | -4.18383100 | 1.48476200  |
| N | -0.71594300 | -2.03969700 | 1.03462400  |
| C | -3.03693100 | -1.63796100 | 0.42003600  |
| H | -2.67963300 | -0.69186100 | -0.00616000 |
| H | -2.92681700 | -2.38263600 | -0.38354700 |
| C | -4.46969100 | -1.52936400 | 0.85117200  |
| C | -5.39676700 | -2.51650400 | 0.50455800  |
| C | -4.90566100 | -0.43792200 | 1.61054500  |
| C | -6.72970400 | -2.41550000 | 0.89652300  |
| H | -5.06716300 | -3.36509400 | -0.09903200 |
| C | -6.23584900 | -0.33240500 | 2.00299500  |
| H | -4.19494900 | 0.34537000  | 1.88210500  |
| C | -7.15193900 | -1.32107600 | 1.64642700  |
| H | -7.43933800 | -3.19070800 | 0.61356300  |
| H | -6.56174700 | 0.52662900  | 2.58674000  |
| H | -8.19255800 | -1.23767900 | 1.95314700  |
| C | 0.91244000  | -3.85117000 | 0.37335900  |
| C | 0.46887100  | -4.86633500 | -0.72675700 |
| H | 0.06008800  | -5.74449500 | -0.21353800 |
| H | 1.37626900  | -5.19267600 | -1.25068100 |
| C | 1.70822700  | -4.59134300 | 1.50041700  |
| H | 0.99341300  | -5.23094800 | 2.03183800  |
| H | 2.43555300  | -5.24934500 | 1.01201300  |
| C | -0.55214900 | -4.30022000 | -1.67828900 |
| C | -1.88298200 | -4.72827700 | -1.61639900 |
| C | -0.21187000 | -3.31101300 | -2.60963900 |
| C | -2.84798600 | -4.19086300 | -2.46548300 |
| H | -2.15920700 | -5.49960100 | -0.89685200 |
| C | -1.17718100 | -2.76215800 | -3.44816600 |
| H | 0.82316700  | -2.97463900 | -2.69505000 |
| C | -2.49810000 | -3.20059700 | -3.38016400 |
| H | -3.87395600 | -4.55256800 | -2.41751500 |
| H | -0.89394900 | -1.99985500 | -4.17278200 |
| H | -3.24726800 | -2.78246300 | -4.05050600 |
| C | 2.40650100  | -3.63678800 | 2.43297600  |
| C | 3.78861900  | -3.43885600 | 2.33838700  |
| C | 1.68685100  | -2.87491000 | 3.36159100  |
| C | 4.43381300  | -2.49604100 | 3.13495900  |
| H | 4.36203300  | -4.03914800 | 1.63218900  |
| C | 2.32573500  | -1.92482700 | 4.15367800  |
| H | 0.61469200  | -3.03710200 | 3.47923600  |
| C | 3.70069000  | -1.72803700 | 4.03736200  |
| H | 5.51059200  | -2.35963300 | 3.04854500  |
| H | 1.74925900  | -1.34503000 | 4.87207000  |
| H | 4.20187000  | -0.99140500 | 4.66261600  |

|    |             |             |             |
|----|-------------|-------------|-------------|
| C  | 3.88314200  | -2.28960100 | -1.00257700 |
| C  | 3.04160300  | -1.02748500 | -0.77104800 |
| C  | 1.85301800  | -2.83922200 | -0.22176900 |
| H  | 4.78075400  | -2.34306000 | -0.37632900 |
| H  | 2.91709700  | -0.46057800 | -1.70116100 |
| H  | 4.15893900  | -2.45433400 | -2.04957300 |
| O  | 3.01429400  | -3.38195100 | -0.60631600 |
| N  | 1.72952100  | -1.56756400 | -0.36011100 |
| C  | 3.53412800  | -0.10486900 | 0.34136400  |
| H  | 2.85952700  | 0.77110600  | 0.36034500  |
| H  | 3.37809700  | -0.61517200 | 1.30529700  |
| C  | 4.96716700  | 0.34368800  | 0.24759100  |
| C  | 5.58470000  | 0.87329200  | 1.38704100  |
| C  | 5.71446700  | 0.25503300  | -0.93027800 |
| C  | 6.90149800  | 1.31668600  | 1.34705000  |
| H  | 5.01653700  | 0.93447500  | 2.31681800  |
| C  | 7.03682300  | 0.69380300  | -0.97343000 |
| H  | 5.26076800  | -0.15174500 | -1.83480900 |
| C  | 7.63329100  | 1.22845700  | 0.16375500  |
| H  | 7.36179200  | 1.72739600  | 2.24352900  |
| H  | 7.60193700  | 0.61335200  | -1.90037200 |
| H  | 8.66557900  | 1.56999100  | 0.13153100  |
| Cu | 0.21603600  | -0.39756700 | 0.27632100  |
| C  | -1.90832000 | 2.91559200  | 1.86406000  |
| C  | -1.63429800 | 1.69404300  | 1.24250700  |
| C  | -0.38209700 | 1.08966300  | 1.35435700  |
| C  | 0.57042900  | 1.70661600  | 2.17671700  |
| C  | 0.30072800  | 2.93483800  | 2.77850200  |
| C  | -0.93906700 | 3.57272400  | 2.62987300  |
| H  | -2.89725500 | 3.35524100  | 1.73712900  |
| H  | -2.41683600 | 1.24014000  | 0.63102900  |
| H  | 1.54698800  | 1.24471200  | 2.34571000  |
| H  | 1.07724800  | 3.40488900  | 3.38367800  |
| C  | -1.17203200 | 4.93437600  | 3.27991600  |
| C  | -0.16838800 | 5.93642000  | 2.69171400  |
| H  | -0.29278800 | 6.03537500  | 1.60572800  |
| H  | -0.31006200 | 6.92901900  | 3.13718800  |
| H  | 0.86848100  | 5.63372500  | 2.88279800  |
| C  | -0.95361000 | 4.82824300  | 4.79457800  |
| H  | -1.10521700 | 5.80459400  | 5.27128700  |
| H  | -1.65570800 | 4.11885700  | 5.24934900  |
| H  | 0.06219500  | 4.49673900  | 5.04042800  |
| C  | -2.58451300 | 5.45915200  | 3.02905200  |
| H  | -2.71039000 | 6.43581800  | 3.51013700  |
| H  | -2.78839400 | 5.59425900  | 1.95899600  |
| H  | -3.35048400 | 4.78973700  | 3.44026100  |
| C  | 0.44239600  | 3.49074300  | -1.01874800 |
| H  | 1.38381000  | 3.56770300  | -0.45860500 |
| H  | -0.35487300 | 3.52224400  | -0.26405200 |
| C  | 0.37939400  | 2.21216500  | -1.80259000 |
| C  | 1.49362400  | 1.69619900  | -2.54005900 |
| C  | 2.78590700  | 2.27385700  | -2.44675600 |
| C  | 1.32962600  | 0.61804500  | -3.45486400 |
| C  | 3.83738900  | 1.80801900  | -3.21876200 |
| H  | 2.96207200  | 3.10457400  | -1.76744200 |
| C  | 2.38619100  | 0.16172000  | -4.22392500 |
| H  | 0.35305100  | 0.15392000  | -3.55950300 |
| C  | 3.64962500  | 0.75050800  | -4.11313900 |
| H  | 4.81699200  | 2.27122300  | -3.12074500 |
| H  | 2.22323700  | -0.65258100 | -4.92845600 |
| H  | 4.47682800  | 0.39815100  | -4.72643100 |
| C  | -0.87071900 | 1.42610100  | -1.76308300 |
| O  | -0.85327600 | 0.19632800  | -1.51465800 |

|   |             |             |             |
|---|-------------|-------------|-------------|
| N | -2.02195400 | 2.10017700  | -1.98382300 |
| H | -1.93213000 | 3.09326700  | -2.17399300 |
| C | -3.34107700 | 1.59040400  | -1.90143800 |
| C | -4.34512200 | 2.45365700  | -1.45240800 |
| C | -3.65589400 | 0.28236400  | -2.28079500 |
| C | -5.65832500 | 2.00503800  | -1.36867400 |
| H | -4.08922900 | 3.47330400  | -1.16405200 |
| C | -4.97303300 | -0.15405100 | -2.18436000 |
| H | -2.87560700 | -0.38661100 | -2.63122400 |
| C | -5.97650200 | 0.69773600  | -1.72918400 |
| H | -6.43381000 | 2.68058100  | -1.01439400 |
| H | -5.21423300 | -1.17841200 | -2.46557700 |
| H | -7.00115800 | 0.34182300  | -1.64916400 |
| C | 0.31791500  | 4.74846800  | -1.85188200 |
| F | 0.40610300  | 5.84593000  | -1.08850400 |
| F | -0.89417600 | 4.79556000  | -2.47999000 |
| F | 1.25027300  | 4.83146800  | -2.80971600 |

**TS4-R** S\*\*2 = 0.66

|   |             |             |             |
|---|-------------|-------------|-------------|
| C | -2.23228500 | -2.99270400 | 2.44184800  |
| C | -2.08753200 | -1.69437600 | 1.64410800  |
| C | -0.27469400 | -2.96178800 | 1.34964600  |
| H | -3.13753500 | -3.55863600 | 2.20023700  |
| H | -2.18042500 | -0.80366300 | 2.27981100  |
| H | -2.16074100 | -2.86944300 | 3.52777300  |
| O | -1.08903200 | -3.78870800 | 2.02451600  |
| N | -0.70189000 | -1.77037600 | 1.14245300  |
| C | -3.05002200 | -1.60330100 | 0.46074900  |
| H | -2.74877300 | -0.75245400 | -0.16009100 |
| H | -2.89591500 | -2.48692200 | -0.17581600 |
| C | -4.48917900 | -1.49363300 | 0.87098000  |
| C | -5.38481300 | -2.53478600 | 0.61073000  |
| C | -4.96594400 | -0.34791000 | 1.51808700  |
| C | -6.72610400 | -2.43346500 | 0.97235100  |
| H | -5.02265700 | -3.43103700 | 0.10186200  |
| C | -6.30458300 | -0.24192100 | 1.88084500  |
| H | -4.28041000 | 0.47534200  | 1.72947300  |
| C | -7.18915900 | -1.28397400 | 1.60687600  |
| H | -7.40980500 | -3.25260400 | 0.75763100  |
| H | -6.66149300 | 0.65844800  | 2.37780200  |
| H | -8.23620400 | -1.20045000 | 1.89080400  |
| C | 1.02078900  | -3.61150700 | 0.95687900  |
| C | 0.68722500  | -4.84572400 | 0.06301000  |
| H | 0.15409000  | -5.57048400 | 0.68915700  |
| H | 1.64241900  | -5.30228700 | -0.22412200 |
| C | 1.76106600  | -4.06380700 | 2.26181900  |
| H | 1.03022200  | -4.59577300 | 2.88198500  |
| H | 2.52989300  | -4.78727400 | 1.96930700  |
| C | -0.13040400 | -4.47725600 | -1.14583500 |
| C | -1.52007700 | -4.63526500 | -1.14023700 |
| C | 0.47376500  | -3.91860700 | -2.27869700 |
| C | -2.28780100 | -4.24133800 | -2.23385600 |
| H | -2.00257000 | -5.07901100 | -0.26764000 |
| C | -0.29092800 | -3.52906300 | -3.37375300 |
| H | 1.55955900  | -3.80417900 | -2.31009900 |
| C | -1.67505600 | -3.68465800 | -3.35296300 |
| H | -3.36812400 | -4.38079100 | -2.21530600 |
| H | 0.19635700  | -3.11712100 | -4.25607300 |
| H | -2.27224000 | -3.38820400 | -4.21348700 |
| C | 2.38713400  | -2.90771100 | 2.99819100  |
| C | 3.77210900  | -2.71046900 | 2.95496800  |
| C | 1.60339300  | -1.96781400 | 3.67905000  |
| C | 4.35859100  | -1.60150700 | 3.56022100  |



|    |             |             |             |
|----|-------------|-------------|-------------|
| H  | 4.39472100  | -3.44359500 | 2.44219200  |
| C  | 2.18358700  | -0.85260600 | 4.27757500  |
| H  | 0.52619700  | -2.11633900 | 3.76006900  |
| C  | 3.56293400  | -0.66281100 | 4.21409000  |
| H  | 5.43860900  | -1.46940100 | 3.51857000  |
| H  | 1.55602200  | -0.13548900 | 4.80357400  |
| H  | 4.01793600  | 0.20426400  | 4.68943900  |
| C  | 4.04338700  | -2.27156700 | -0.51797100 |
| C  | 3.16423300  | -1.01815000 | -0.60881600 |
| C  | 1.97137400  | -2.71152300 | 0.21923000  |
| H  | 4.88996700  | -2.16613200 | 0.17045400  |
| H  | 3.09783100  | -0.66110400 | -1.64169400 |
| H  | 4.40480700  | -2.63498600 | -1.48551700 |
| O  | 3.16548100  | -3.28743900 | 0.02652100  |
| N  | 1.83520300  | -1.49830700 | -0.18141700 |
| C  | 3.56266100  | 0.12316000  | 0.32040000  |
| H  | 2.84237100  | 0.94532900  | 0.15007100  |
| H  | 3.38977400  | -0.20461800 | 1.35859500  |
| C  | 4.97300300  | 0.62874600  | 0.18729300  |
| C  | 5.49289800  | 1.44818900  | 1.19673200  |
| C  | 5.79374700  | 0.31582200  | -0.90029400 |
| C  | 6.78562600  | 1.95191600  | 1.11566200  |
| H  | 4.86705400  | 1.68830200  | 2.05809200  |
| C  | 7.09286000  | 0.81499800  | -0.98307600 |
| H  | 5.41700800  | -0.31753600 | -1.70458000 |
| C  | 7.59157100  | 1.63606300  | 0.02271400  |
| H  | 7.16938100  | 2.58873800  | 1.91024800  |
| H  | 7.71671600  | 0.55640700  | -1.83670900 |
| H  | 8.60559700  | 2.02468800  | -0.04029600 |
| Cu | 0.28118200  | -0.25867400 | 0.18277100  |
| C  | -2.13899300 | 2.91595300  | 1.63381300  |
| C  | -1.73605400 | 1.71627800  | 1.03914500  |
| C  | -0.41693100 | 1.27490600  | 1.12862400  |
| C  | 0.47857700  | 2.03019200  | 1.89487700  |
| C  | 0.07411800  | 3.22872900  | 2.48018100  |
| C  | -1.23548400 | 3.71143400  | 2.34549700  |
| H  | -3.17601700 | 3.23052300  | 1.52002600  |
| H  | -2.47274100 | 1.15721000  | 0.45922500  |
| H  | 1.51339700  | 1.70426500  | 2.03015400  |
| H  | 0.80406300  | 3.80833900  | 3.04705300  |
| C  | -1.60484800 | 5.07251500  | 2.92984800  |
| C  | -0.74693000 | 6.14280400  | 2.23908600  |
| H  | -0.90546700 | 6.13988900  | 1.15245000  |
| H  | -1.00074100 | 7.14208100  | 2.61426700  |
| H  | 0.32332500  | 5.98376500  | 2.41893900  |
| C  | -1.32027800 | 5.08808500  | 4.43687400  |
| H  | -1.56524200 | 6.06957100  | 4.86121500  |
| H  | -1.91963900 | 4.33527600  | 4.96329900  |
| H  | -0.26484400 | 4.88953100  | 4.65798500  |
| C  | -3.07749000 | 5.41397100  | 2.71063100  |
| H  | -3.30185900 | 6.39393600  | 3.14702700  |
| H  | -3.33312000 | 5.46586500  | 1.64464100  |
| H  | -3.74355200 | 4.68287700  | 3.18595100  |
| C  | 0.31530300  | 3.04601200  | -1.30675200 |
| H  | 1.21149600  | 3.22220500  | -0.69892300 |
| H  | -0.52723600 | 3.17957500  | -0.61853400 |
| C  | 0.31913500  | 1.65186500  | -1.87512300 |
| C  | 1.46096000  | 1.15254300  | -2.59973600 |
| C  | 2.71035800  | 1.82319000  | -2.54776800 |
| C  | 1.37090600  | 0.01180400  | -3.44446700 |
| C  | 3.78802700  | 1.39897000  | -3.30653300 |
| H  | 2.83491500  | 2.69497300  | -1.91067500 |
| C  | 2.45540800  | -0.40322700 | -4.19970800 |

|   |             |             |             |
|---|-------------|-------------|-------------|
| H | 0.43694700  | -0.53851000 | -3.50064100 |
| C | 3.67016900  | 0.28479800  | -4.14124300 |
| H | 4.73030300  | 1.93862400  | -3.24375400 |
| H | 2.35203100  | -1.26734600 | -4.85371900 |
| H | 4.51573300  | -0.03952600 | -4.74468700 |
| C | -0.96029500 | 0.88855200  | -1.95142800 |
| O | -0.97589000 | -0.34191800 | -1.74497700 |
| N | -2.08346600 | 1.59536100  | -2.22184300 |
| H | -1.97929800 | 2.59105500  | -2.38185300 |
| C | -3.41367700 | 1.10829000  | -2.18402100 |
| C | -4.41277100 | 1.99751100  | -1.77514300 |
| C | -3.74288400 | -0.20259600 | -2.54241100 |
| C | -5.73422900 | 1.57195300  | -1.70512200 |
| H | -4.14558300 | 3.01870300  | -1.50190100 |
| C | -5.06788400 | -0.61626000 | -2.45583000 |
| H | -2.96635300 | -0.88977200 | -2.86040300 |
| C | -6.06600500 | 0.26092100  | -2.03807300 |
| H | -6.50496300 | 2.26712200  | -1.37943100 |
| H | -5.32085700 | -1.64152700 | -2.72234800 |
| H | -7.09712200 | -0.07747900 | -1.96606800 |
| C | 0.23357100  | 4.18680400  | -2.30292000 |
| F | 0.25609500  | 5.36204900  | -1.65885800 |
| F | -0.93551200 | 4.14127200  | -3.00595700 |
| F | 1.22099600  | 4.18914700  | -3.20666800 |

### INT7-R

|   |             |             |             |
|---|-------------|-------------|-------------|
| C | -2.58930200 | 1.03437500  | 3.06176900  |
| C | -2.16562100 | 1.04345500  | 1.58907000  |
| C | -0.64868700 | -0.06800400 | 2.79855200  |
| H | -3.52497800 | 0.49096900  | 3.24032900  |
| H | -1.95206400 | 2.06320000  | 1.23605700  |
| H | -2.65999700 | 2.02401900  | 3.52069600  |
| O | -1.52729500 | 0.31556400  | 3.73838500  |
| N | -0.89739300 | 0.29222300  | 1.59342600  |
| C | -3.15850800 | 0.36657100  | 0.64639900  |
| H | -2.73262200 | 0.41181000  | -0.36705900 |
| H | -3.21033400 | -0.70091500 | 0.90482100  |
| C | -4.52533300 | 0.98513500  | 0.65963100  |
| C | -5.59206100 | 0.33611800  | 1.28636900  |
| C | -4.75825900 | 2.22180500  | 0.04763900  |
| C | -6.86527500 | 0.90079500  | 1.29410500  |
| H | -5.42280200 | -0.63808400 | 1.74972900  |
| C | -6.02837600 | 2.78859800  | 0.05114700  |
| H | -3.93312800 | 2.74037500  | -0.44603600 |
| C | -7.08607500 | 2.12724100  | 0.67391400  |
| H | -7.68731300 | 0.37807500  | 1.77961100  |
| H | -6.19635200 | 3.74750600  | -0.43542400 |
| H | -8.08039400 | 2.56882900  | 0.67474000  |
| C | 0.47884300  | -0.87875800 | 3.35936000  |
| C | -0.13111100 | -2.13596600 | 4.05395000  |
| H | -0.73593300 | -1.77656600 | 4.89435300  |
| H | 0.70536500  | -2.70532500 | 4.47471600  |
| C | 1.21472500  | -0.02308900 | 4.44153800  |
| H | 0.46329900  | 0.26434900  | 5.18597400  |
| H | 1.93013900  | -0.68660300 | 4.93979400  |
| C | -0.95914500 | -2.99182700 | 3.13743400  |
| C | -2.34704000 | -2.82755500 | 3.07243300  |
| C | -0.36025800 | -3.95698000 | 2.32113400  |
| C | -3.11836000 | -3.61809600 | 2.22560600  |
| H | -2.82718800 | -2.09186400 | 3.71970400  |
| C | -1.12844600 | -4.74869500 | 1.47292200  |
| H | 0.71869600  | -4.10880900 | 2.37786200  |
| C | -2.51066700 | -4.58417400 | 1.42682200  |

|    |             |             |             |              |             |             |             |
|----|-------------|-------------|-------------|--------------|-------------|-------------|-------------|
| H  | -4.20003600 | -3.49117300 | 2.20481600  | C            | -0.00968100 | -0.72330200 | -2.22719700 |
| H  | -0.64854900 | -5.50984500 | 0.86009300  | C            | 1.15504800  | -1.63379000 | -2.31192100 |
| H  | -3.11479800 | -5.21876100 | 0.77966600  | C            | 2.41082300  | -1.13002900 | -2.70366100 |
| C  | 1.91223300  | 1.18769900  | 3.88812300  | C            | 1.03782700  | -3.02214600 | -2.10285400 |
| C  | 3.26976300  | 1.13735000  | 3.55628900  | C            | 3.49353800  | -1.97257300 | -2.90152400 |
| C  | 1.21560800  | 2.38304000  | 3.67481400  | H            | 2.53728000  | -0.05956200 | -2.86161100 |
| C  | 3.91794500  | 2.25288600  | 3.02943800  | C            | 2.12292200  | -3.86553900 | -2.31234400 |
| H  | 3.82791900  | 0.21722900  | 3.73585000  | H            | 0.08807700  | -3.44478700 | -1.78774900 |
| C  | 1.85907000  | 3.49914900  | 3.15000900  | C            | 3.35291800  | -3.34858000 | -2.71366200 |
| H  | 0.16200800  | 2.44507500  | 3.95155300  | H            | 4.45540600  | -1.55756400 | -3.19627900 |
| C  | 3.21345400  | 3.43701100  | 2.82771600  | H            | 2.00052900  | -4.93750300 | -2.17052800 |
| H  | 4.97999100  | 2.19963700  | 2.79342700  | H            | 4.20256500  | -4.00903200 | -2.87595200 |
| H  | 1.30437200  | 4.42388100  | 3.00057800  | C            | -1.27944600 | -1.34104600 | -1.73777600 |
| H  | 3.72265400  | 4.31567000  | 2.43476800  | O            | -1.21838800 | -1.87542200 | -0.59496200 |
| C  | 3.38505700  | -2.42743600 | 1.86916400  | N            | -2.42699100 | -1.19822900 | -2.43133400 |
| C  | 2.88669500  | -1.65003500 | 0.64438100  | H            | -2.34378100 | -0.83013000 | -3.37143100 |
| C  | 1.49898200  | -1.31547400 | 2.34452500  | C            | -3.74579000 | -1.51449900 | -2.00921100 |
| H  | 4.39913800  | -2.15895300 | 2.18288300  | C            | -4.78395100 | -0.73577900 | -2.52726000 |
| H  | 2.70854900  | -2.31812400 | -0.20672700 | C            | -4.01890200 | -2.55910200 | -1.12489200 |
| H  | 3.31888000  | -3.51702000 | 1.76650900  | C            | -6.09779000 | -0.99810400 | -2.15935800 |
| O  | 2.48182000  | -2.03285500 | 2.92503600  | H            | -4.55661000 | 0.08609600  | -3.20651300 |
| N  | 1.58807300  | -1.08873800 | 1.08458400  | C            | -5.33994100 | -2.80947000 | -0.76528000 |
| C  | 3.82090000  | -0.52168200 | 0.23334700  | H            | -3.20908800 | -3.15766900 | -0.72132700 |
| H  | 3.32572400  | 0.05465700  | -0.56119100 | C            | -6.38043900 | -2.03708000 | -1.27607000 |
| H  | 3.91375100  | 0.17526300  | 1.08277500  | H            | -6.89980400 | -0.37965400 | -2.55611200 |
| C  | 5.18909700  | -0.94301900 | -0.23387300 | H            | -5.55637800 | -3.63103700 | -0.08383900 |
| C  | 6.11725200  | 0.04921100  | -0.57236300 | H            | -7.40838400 | -2.24153100 | -0.98502300 |
| C  | 5.57211400  | -2.27997700 | -0.37417700 | C            | -0.12869700 | -0.08188300 | -4.72520300 |
| C  | 7.38013700  | -0.28168800 | -1.04883300 | F            | -0.33629500 | 0.97891000  | -5.51943500 |
| H  | 5.83554500  | 1.09781100  | -0.46277300 | F            | -1.15568000 | -0.95343500 | -4.94892900 |
| C  | 6.83877900  | -2.61726100 | -0.84907800 | F            | 0.98728600  | -0.69127700 | -5.13648700 |
| H  | 4.86912500  | -3.07995600 | -0.13901300 |              |             |             |             |
| C  | 7.74569700  | -1.61990400 | -1.19053100 |              |             |             |             |
| H  | 8.08353500  | 0.50650100  | -1.31010600 | <b>TS5-R</b> |             |             |             |
| H  | 7.11418800  | -3.66535800 | -0.95223400 | Cu           | 0.25632100  | 0.13933900  | -0.04143400 |
| H  | 8.73394900  | -1.88141600 | -1.56242100 | C            | -2.27102600 | -1.08558100 | 3.04407300  |
| Cu | -0.01512700 | -0.17092200 | -0.19152300 | C            | -1.90500700 | -0.27533900 | 1.96864300  |
| C  | -0.54668400 | 3.87734300  | -1.21845900 | C            | -0.55878200 | -0.04094300 | 1.70207300  |
| C  | -0.72902000 | 2.49671700  | -1.10057700 | C            | 0.41031500  | -0.52206900 | 2.58708500  |
| C  | 0.28822900  | 1.69429900  | -0.59407200 | C            | 0.03060300  | -1.35707000 | 3.63581000  |
| C  | 1.47835100  | 2.27906900  | -0.17550800 | C            | -1.31444000 | -1.66619900 | 3.88398300  |
| C  | 1.65300100  | 3.65581500  | -0.31746800 | H            | -3.33099400 | -1.26536000 | 3.21194400  |
| C  | 0.65455400  | 4.48486600  | -0.84249800 | H            | -2.69039800 | 0.15131800  | 1.34445000  |
| H  | -1.36502100 | 4.47486800  | -1.61664900 | H            | 1.46674200  | -0.28667200 | 2.44544000  |
| H  | -1.68465900 | 2.06753400  | -1.41180200 | H            | 0.80784600  | -1.76890500 | 4.28008400  |
| H  | 2.26354000  | 1.69086500  | 0.29805500  | C            | -1.67970200 | -2.61398700 | 5.02254500  |
| H  | 2.59736000  | 4.08966100  | 0.01356900  | C            | -1.11809300 | -2.07988900 | 6.34634300  |
| C  | 0.90539500  | 5.98626900  | -0.97038600 | H            | -1.53793200 | -1.09647500 | 6.58997400  |
| C  | 2.10733900  | 6.21884700  | -1.89543300 | H            | -1.36571000 | -2.76316500 | 7.16769600  |
| H  | 1.92032900  | 5.81912300  | -2.89955900 | H            | -0.02642900 | -1.98105500 | 6.32115000  |
| H  | 2.31255400  | 7.29204600  | -1.99368800 | C            | -1.06115500 | -3.98758700 | 4.72460100  |
| H  | 3.01705800  | 5.74256400  | -1.51018300 | H            | -1.30466300 | -4.69961400 | 5.52271800  |
| C  | 1.21665300  | 6.56827500  | 0.41515700  | H            | -1.44324400 | -4.39749100 | 3.78009800  |
| H  | 1.40716700  | 7.64622700  | 0.34385000  | H            | 0.03202500  | -3.93511500 | 4.64931400  |
| H  | 0.37738000  | 6.42097300  | 1.10682700  | C            | -3.19105900 | -2.78444400 | 5.16780600  |
| H  | 2.10658800  | 6.10675000  | 0.86158700  | H            | -3.41022200 | -3.47141600 | 5.99289600  |
| C  | -0.30131300 | 6.72564700  | -1.54542100 | H            | -3.69376400 | -1.83499400 | 5.38986600  |
| H  | -0.08078700 | 7.79646000  | -1.62159500 | H            | -3.64676500 | -3.20748500 | 4.26263600  |
| H  | -0.55730800 | 6.37294400  | -2.55229800 | C            | -0.65701100 | 2.58108600  | 2.28270400  |
| H  | -1.18971400 | 6.61971600  | -0.90998800 | H            | 0.14364000  | 2.28797700  | 2.96570700  |
| C  | -0.08615600 | 0.36737500  | -3.27628000 | H            | -1.55272900 | 2.08992100  | 2.67157900  |
| H  | 0.75950500  | 1.05704100  | -3.19037100 | C            | -0.35819600 | 2.09919600  | 0.86673400  |
| H  | -0.97388600 | 0.98889800  | -3.12379200 | C            | 0.84982300  | 2.75610700  | 0.26703300  |
|    |             |             |             | C            | 1.88959100  | 3.21276400  | 1.10060300  |

|   |             |             |             |             |             |             |             |
|---|-------------|-------------|-------------|-------------|-------------|-------------|-------------|
| C | 0.94117000  | 3.05319400  | -1.10905300 | H           | 1.43395900  | -3.76659600 | -0.15786600 |
| C | 2.93929700  | 3.97252300  | 0.59536900  | C           | 4.61447800  | -3.79380100 | 1.02936900  |
| H | 1.87135200  | 3.00348500  | 2.16870700  | H           | 6.38521100  | -3.51240800 | -0.16597500 |
| C | 1.99724300  | 3.80591300  | -1.60719400 | H           | 2.67862600  | -4.06229100 | 1.94148600  |
| H | 0.17177200  | 2.70177000  | -1.79057100 | H           | 5.16452300  | -3.94179000 | 1.95620600  |
| C | 2.99827400  | 4.28199300  | -0.76148500 | C           | 0.07509500  | -0.52565600 | -4.24581300 |
| H | 3.71555100  | 4.32723500  | 1.27039200  | C           | -1.28911600 | -0.81097500 | -4.35734100 |
| H | 2.02670000  | 4.03661800  | -2.67155100 | C           | 0.47919600  | 0.81399300  | -4.23058300 |
| H | 3.81299500  | 4.88676400  | -1.15294700 | C           | -2.22689500 | 0.21411900  | -4.45210800 |
| C | -1.53776100 | 2.01842900  | -0.07729800 | H           | -1.61464400 | -1.85262100 | -4.38650400 |
| O | -1.42494900 | 1.33342000  | -1.10721800 | C           | -0.45582500 | 1.83995000  | -4.33403900 |
| N | -2.68311200 | 2.65605600  | 0.26598700  | H           | 1.54279200  | 1.05299400  | -4.16016600 |
| H | -2.67056100 | 3.24113200  | 1.09250600  | C           | -1.81245000 | 1.54309800  | -4.44108600 |
| C | -3.91786500 | 2.68814900  | -0.42519300 | H           | -3.28550900 | -0.02756900 | -4.54866400 |
| C | -4.90065100 | 3.52810000  | 0.11186000  | H           | -0.12390000 | 2.87751000  | -4.34414700 |
| C | -4.19323400 | 1.92909900  | -1.56879400 | H           | -2.54399500 | 2.34522200  | -4.52043900 |
| C | -6.14999500 | 3.61278800  | -0.48643000 | C           | -1.42259600 | -3.70066000 | -1.38165800 |
| H | -4.67776700 | 4.11895800  | 1.00108600  | C           | -1.55887600 | -2.39471500 | -0.59116800 |
| C | -5.45189900 | 2.02866700  | -2.15469900 | C           | 0.25305000  | -2.29838100 | -1.87929100 |
| H | -3.43310800 | 1.28711700  | -1.99805800 | H           | -2.30279800 | -3.94350500 | -1.98480800 |
| C | -6.43279200 | 2.86216500  | -1.62556200 | H           | -1.55486500 | -2.57007100 | 0.49325600  |
| H | -6.90354700 | 4.27083900  | -0.05993600 | H           | -1.14769500 | -4.57193200 | -0.77695300 |
| H | -5.66270800 | 1.44019400  | -3.04667400 | O           | -0.32049000 | -3.44313300 | -2.29021700 |
| H | -7.41034700 | 2.92940300  | -2.09694600 | N           | -0.32539700 | -1.66025100 | -0.92941600 |
| C | -0.87422100 | 4.09283100  | 2.44123100  | C           | -2.78552200 | -1.58694400 | -0.99839900 |
| F | -0.05128200 | 4.63219800  | 3.34528200  | H           | -2.69467800 | -0.58247400 | -0.56888800 |
| F | -2.14996300 | 4.32598100  | 2.86355300  | H           | -2.74147400 | -1.42230700 | -2.08568600 |
| F | -0.74116800 | 4.78505300  | 1.29393000  | C           | -4.09902000 | -2.21812900 | -0.62438400 |
| C | 4.08743900  | 0.49456800  | -2.05188800 | C           | -5.18644100 | -2.11794000 | -1.49828600 |
| C | 3.30491000  | 0.64231000  | -0.75670400 | C           | -4.28646400 | -2.88586500 | 0.59204500  |
| C | 2.27195400  | -0.80503400 | -2.07880100 | C           | -6.42689500 | -2.65395900 | -1.16720400 |
| H | 5.14594200  | 0.25323500  | -1.92176400 | H           | -5.05153800 | -1.60566600 | -2.45264300 |
| H | 3.12435100  | 1.69092700  | -0.51671700 | C           | -5.52546800 | -3.42700900 | 0.92553100  |
| H | 3.98508900  | 1.35618900  | -2.72333800 | H           | -3.45795900 | -2.98542200 | 1.29527800  |
| O | 3.45218900  | -0.63919800 | -2.69744800 | C           | -6.60032600 | -3.31140000 | 0.04820100  |
| N | 2.02789300  | -0.04032700 | -1.07146000 | H           | -7.25891900 | -2.56383400 | -1.86282800 |
| C | 3.93783400  | -0.07131400 | 0.44704800  | H           | -5.65041900 | -3.94521900 | 1.87487900  |
| H | 3.21402800  | -0.01843800 | 1.27389300  | H           | -7.56739100 | -3.73647200 | 0.30815500  |
| H | 4.04854000  | -1.13581600 | 0.19657000  |             |             |             |             |
| C | 5.25544600  | 0.51718200  | 0.85927900  | <b>4a-R</b> |             |             |             |
| C | 6.45626500  | -0.00021900 | 0.36195800  | C           | 3.71506100  | 0.52515600  | 0.55893200  |
| C | 5.31084500  | 1.61549200  | 1.72291800  | C           | 2.37310700  | 0.86716000  | 0.69417700  |
| C | 7.67806800  | 0.57269100  | 0.70618300  | C           | 1.35285100  | -0.00188600 | 0.30167900  |
| H | 6.42717900  | -0.87703400 | -0.28757900 | C           | 1.72983700  | -1.22255200 | -0.26600300 |
| C | 6.52867600  | 2.19077500  | 2.07119700  | C           | 3.07173700  | -1.55513700 | -0.40598700 |
| H | 4.38224300  | 2.01214500  | 2.13537900  | C           | 4.09899400  | -0.69948400 | 0.00750000  |
| C | 7.71650000  | 1.67281000  | 1.55871300  | H           | 4.46789700  | 1.23909200  | 0.88612000  |
| H | 8.60280500  | 0.15365100  | 0.31423500  | H           | 2.12462700  | 1.85025100  | 1.09534000  |
| H | 6.55338600  | 3.04010700  | 2.75183700  | H           | 0.97496700  | -1.93639700 | -0.58212700 |
| H | 8.67021700  | 2.11886600  | 1.83256700  | H           | 3.32185000  | -2.51993100 | -0.84818300 |
| C | 1.49329700  | -1.95490800 | -2.65216200 | C           | 5.55619100  | -1.12192200 | -0.15950200 |
| C | 2.45477100  | -3.18892700 | -2.66199800 | C           | 5.84444300  | -1.37711800 | -1.64479600 |
| H | 3.17634100  | -3.02928300 | -3.47056800 | H           | 5.68246800  | -0.47096000 | -2.24159600 |
| H | 1.85216900  | -4.06184400 | -2.93850800 | H           | 6.88643500  | -1.69339100 | -1.78538400 |
| C | 1.07887800  | -1.63676800 | -4.12301700 | H           | 5.20088600  | -2.16471600 | -2.05469200 |
| H | 2.00168600  | -1.39589600 | -4.66488600 | C           | 5.80198700  | -2.41489900 | 0.62931600  |
| H | 0.68351800  | -2.56501200 | -4.55330400 | H           | 6.84301100  | -2.74412200 | 0.51327300  |
| C | 3.19300200  | -3.41715800 | -1.36871000 | H           | 5.61042700  | -2.26907800 | 1.69952000  |
| C | 4.59029700  | -3.35037700 | -1.34345100 | H           | 5.15519200  | -3.23062400 | 0.28485100  |
| C | 2.52045900  | -3.68120100 | -0.16846400 | C           | 6.52763800  | -0.05616200 | 0.34469700  |
| C | 5.29726800  | -3.55031800 | -0.15982800 | H           | 7.56086700  | -0.39830700 | 0.20934400  |
| H | 5.12700800  | -3.14229500 | -2.26964200 | H           | 6.41937400  | 0.88856500  | -0.20289000 |
| C | 3.22260500  | -3.85806000 | 1.02058000  | H           | 6.38742900  | 0.15288300  | 1.41271400  |

|   |             |             |             |
|---|-------------|-------------|-------------|
| C | -0.33176300 | 0.92967200  | 1.88399900  |
| H | 0.24494600  | 1.83531700  | 2.09416500  |
| H | 0.05499300  | 0.14657300  | 2.54436900  |
| C | -0.10668400 | 0.46760700  | 0.42167200  |
| C | -0.27364400 | 1.57489700  | -0.62289100 |
| C | -0.41701100 | 2.92884600  | -0.30944200 |
| C | -0.18173100 | 1.22167800  | -1.97863900 |
| C | -0.48148900 | 3.89396400  | -1.31312700 |
| H | -0.49412800 | 3.25069000  | 0.72590000  |
| C | -0.25637600 | 2.17984400  | -2.98135800 |
| H | -0.04033000 | 0.17321200  | -2.24431400 |
| C | -0.40639600 | 3.52581300  | -2.65142400 |
| H | -0.59547600 | 4.94136800  | -1.03962700 |
| H | -0.18649000 | 1.87491200  | -4.02390000 |
| H | -0.45992000 | 4.28081100  | -3.43330200 |
| C | -1.08588500 | -0.72652400 | 0.25295400  |
| O | -0.87045200 | -1.78218000 | 0.83089300  |
| N | -2.21408300 | -0.45899800 | -0.47044800 |
| H | -2.27134400 | 0.46510000  | -0.88107200 |
| C | -3.36982400 | -1.24627900 | -0.61379500 |
| C | -4.38847400 | -0.73125700 | -1.42611700 |
| C | -3.54543400 | -2.48555400 | 0.01352900  |
| C | -5.56797600 | -1.43970100 | -1.60964500 |
| H | -4.24910500 | 0.23438300  | -1.91310400 |
| C | -4.73422100 | -3.18196300 | -0.18201000 |
| H | -2.75915300 | -2.88492600 | 0.64185000  |
| C | -5.74858500 | -2.67309100 | -0.98810600 |
| H | -6.34889300 | -1.02250400 | -2.24279400 |
| H | -4.86430500 | -4.14368500 | 0.31137300  |
| H | -6.67168600 | -3.23087200 | -1.13111300 |
| C | -1.75566100 | 1.18959200  | 2.32660600  |
| F | -1.75668100 | 1.86757000  | 3.49300100  |
| F | -2.44866600 | 0.05374500  | 2.52774700  |
| F | -2.46759500 | 1.92563800  | 1.44124600  |

**TS9** S\*\*2 = 0.75

|   |             |             |             |
|---|-------------|-------------|-------------|
| C | -1.61696400 | -0.83914300 | -0.86585800 |
| H | -1.87124600 | -1.90552800 | -0.87045400 |
| H | -1.40026900 | -0.56290600 | -1.90720100 |
| C | -0.41314400 | -0.61371600 | 0.01683200  |
| C | 0.02123100  | 0.76248200  | 0.30524400  |
| C | 0.52820700  | 1.12403500  | 1.56461100  |
| C | 0.03896400  | 1.73220400  | -0.71331000 |
| C | 1.01963100  | 2.40299200  | 1.79883700  |
| H | 0.51161900  | 0.40145400  | 2.37966600  |
| C | 0.53355800  | 3.00666700  | -0.47910200 |
| H | -0.33687300 | 1.47759600  | -1.70286000 |
| C | 1.02822800  | 3.34998800  | 0.77866000  |
| H | 1.39304600  | 2.66168600  | 2.78814700  |
| H | 0.53586700  | 3.73849200  | -1.28503400 |
| H | 1.41368900  | 4.35117400  | 0.96163300  |
| C | -0.28383600 | -1.59774400 | 1.16758700  |
| O | -1.17545200 | -1.93399900 | 1.92265600  |
| N | 1.02011100  | -2.07077100 | 1.25498700  |
| H | 1.32468300  | -2.52611200 | 2.10563300  |
| C | 1.87781000  | -1.62217600 | 0.25003400  |
| C | 3.14316700  | -1.10484700 | 0.42388200  |
| C | 1.14127800  | -1.45343800 | -0.97408700 |
| C | 3.74673100  | -0.41229400 | -0.63798600 |
| H | 3.64299500  | -1.18854900 | 1.38773300  |
| C | 1.78221100  | -0.73055600 | -2.02430600 |
| H | 0.48889100  | -2.28287100 | -1.26451200 |
| C | 3.04708800  | -0.20216300 | -1.83501600 |

|   |             |             |             |
|---|-------------|-------------|-------------|
| H | 4.74916300  | -0.00854200 | -0.51544200 |
| H | 1.27961800  | -0.62427000 | -2.98482500 |
| H | 3.52607400  | 0.34904900  | -2.64233700 |
| C | -2.88372700 | -0.09663400 | -0.48511500 |
| F | -3.93785800 | -0.62585100 | -1.14679700 |
| F | -2.82791200 | 1.20816800  | -0.82827500 |
| F | -3.15167600 | -0.15423000 | 0.82376800  |

**INT10** S\*\*2 = 0.75

|   |             |             |             |
|---|-------------|-------------|-------------|
| C | -1.19632700 | -1.27744300 | -0.86838200 |
| H | -1.22606600 | -2.36201900 | -0.71263300 |
| H | -0.99524200 | -1.11952100 | -1.93597900 |
| C | -0.05880100 | -0.68553400 | -0.02516500 |
| C | -0.18634900 | 0.81383400  | 0.22987800  |
| C | -0.24710300 | 1.34470600  | 1.52108200  |
| C | -0.22835100 | 1.70107600  | -0.85205500 |
| C | -0.32671300 | 2.72007300  | 1.72571000  |
| H | -0.25481800 | 0.68112900  | 2.38383200  |
| C | -0.30869600 | 3.07362000  | -0.65082400 |
| H | -0.22435900 | 1.31426200  | -1.86891700 |
| C | -0.35086700 | 3.59032200  | 0.64167300  |
| H | -0.37657000 | 3.10846200  | 2.74133400  |
| H | -0.34362300 | 3.74157400  | -1.50952800 |
| H | -0.41355600 | 4.66520200  | 0.80091800  |
| C | 0.08900400  | -1.43591200 | 1.32046900  |
| O | -0.78233000 | -1.86437000 | 2.04800600  |
| N | 1.44909300  | -1.51016000 | 1.58063300  |
| H | 1.79236400  | -1.82422400 | 2.47913900  |
| C | 2.23524400  | -1.07592300 | 0.53007400  |
| C | 3.54401200  | -0.69026700 | 0.51658300  |
| C | 1.33447000  | -1.04030900 | -0.66453200 |
| C | 4.07308900  | -0.13682200 | -0.67178700 |
| H | 4.15656100  | -0.76443300 | 1.41373500  |
| C | 1.91472500  | -0.27182900 | -1.79851300 |
| H | 1.20040200  | -2.09835900 | -0.99174600 |
| C | 3.23510700  | 0.09034000  | -1.78830700 |
| H | 5.11620000  | 0.16758200  | -0.70487000 |
| H | 1.30878700  | -0.11672400 | -2.69012500 |
| H | 3.65742700  | 0.57472300  | -2.66755800 |
| C | -2.59868100 | -0.76094500 | -0.62528300 |
| F | -3.49668100 | -1.64300400 | -1.11921500 |
| F | -2.82202100 | 0.40963000  | -1.26311000 |
| F | -2.88408600 | -0.57057000 | 0.66790100  |

**TS9'** S\*\*2 = 0.75

|   |             |             |             |
|---|-------------|-------------|-------------|
| C | 1.69036600  | -0.61094000 | 1.07472600  |
| C | 0.45152300  | -0.47990600 | 0.22255700  |
| C | 0.14785300  | 0.80611300  | -0.42232900 |
| C | -0.46156900 | 0.86733900  | -1.68744200 |
| C | 0.35369700  | 2.01535500  | 0.26624200  |
| C | -0.83895800 | 2.08426600  | -2.24278200 |
| H | -0.61614400 | -0.04895300 | -2.25693400 |
| C | -0.02616300 | 3.22843100  | -0.28844200 |
| H | 0.81549500  | 1.99904800  | 1.25186600  |
| C | -0.62713800 | 3.27072300  | -1.54599400 |
| H | -1.29655500 | 2.10469600  | -3.23034900 |
| H | 0.14506200  | 4.14945100  | 0.26611500  |
| H | -0.92337600 | 4.22354100  | -1.98053300 |
| C | 0.10866600  | -1.71511200 | -0.58460000 |
| O | 0.89499700  | -2.36244300 | -1.25313500 |
| N | -1.24899800 | -2.02014500 | -0.49371300 |
| C | -1.94929900 | -1.19699200 | 0.38913700  |
| C | -3.16957400 | -0.60467300 | 0.14066100  |

|   |             |             |             |
|---|-------------|-------------|-------------|
| C | -1.11009800 | -0.79457300 | 1.48456200  |
| C | -3.60499400 | 0.43250600  | 0.98079400  |
| H | -3.75838700 | -0.90048700 | -0.72619600 |
| C | -1.58208600 | 0.26909000  | 2.30818200  |
| H | -0.52968200 | -1.58434100 | 1.97118000  |
| C | -2.79152900 | 0.88302900  | 2.02972400  |
| H | -4.56611800 | 0.90678700  | 0.79542600  |
| H | -0.99763900 | 0.57351900  | 3.17554800  |
| H | -3.14030700 | 1.69612900  | 2.66394600  |
| C | -1.87886200 | -2.87857800 | -1.46702400 |
| H | -2.40873400 | -2.29297400 | -2.23266000 |
| H | -1.09105000 | -3.46131400 | -1.94957700 |
| H | -2.59290800 | -3.54930000 | -0.97897600 |
| C | 3.00086500  | -0.19106700 | 0.43649700  |
| F | 3.13433800  | 1.15202700  | 0.38784000  |
| F | 3.14791000  | -0.65197500 | -0.80992000 |
| F | 4.03498400  | -0.65586600 | 1.17413400  |
| H | 1.59726200  | -0.02563500 | 2.00015300  |
| H | 1.81478600  | -1.65736900 | 1.37678100  |

**INT10'** S\*\*2 = 0.75

|   |             |             |             |
|---|-------------|-------------|-------------|
| C | -1.28912700 | 1.00930500  | 1.21340900  |
| H | -1.18539400 | 2.08709500  | 1.38355300  |
| H | -1.24035700 | 0.53073400  | 2.20015900  |
| C | -0.12273800 | 0.53187100  | 0.33738800  |
| C | -0.37132900 | -0.79939100 | -0.36742300 |
| C | -0.28466100 | -0.93266800 | -1.75599400 |
| C | -0.66823400 | -1.93952800 | 0.38848000  |
| C | -0.47300500 | -2.16911500 | -2.36880100 |
| H | -0.09019000 | -0.06004900 | -2.37764200 |
| C | -0.85813500 | -3.17403100 | -0.22048800 |
| H | -0.77796800 | -1.85849600 | 1.46791100  |
| C | -0.75455600 | -3.29554500 | -1.60385500 |
| H | -0.40493500 | -2.24579800 | -3.45248200 |
| H | -1.09266900 | -4.04406300 | 0.39009400  |
| H | -0.90302300 | -4.26184100 | -2.08227100 |
| C | 0.27276200  | 1.60153400  | -0.70220700 |
| O | -0.45449300 | 2.32553400  | -1.35359200 |
| N | 1.65805700  | 1.56841700  | -0.81914200 |
| C | 2.24223000  | 0.74482600  | 0.12369000  |
| C | 3.49732500  | 0.20664500  | 0.13333900  |
| C | 1.20766200  | 0.48796900  | 1.17162200  |
| C | 3.81778900  | -0.73912100 | 1.13415200  |
| H | 4.21938600  | 0.46216300  | -0.64073100 |
| C | 1.56090900  | -0.65592500 | 2.05571500  |
| H | 1.14833300  | 1.40826000  | 1.79903800  |
| C | 2.82888000  | -1.17329800 | 2.04770600  |
| H | 4.81296600  | -1.17587300 | 1.16351300  |
| H | 0.83633300  | -0.98736400 | 2.79830600  |
| H | 3.08743800  | -1.94980800 | 2.76632400  |
| C | -2.69632000 | 0.77814900  | 0.70434500  |
| F | -3.55121800 | 1.60920700  | 1.34213800  |
| F | -3.12311600 | -0.47862700 | 0.96123500  |
| F | -2.83317500 | 0.98334500  | -0.61057500 |
| C | 2.35769900  | 2.23128400  | -1.88962100 |
| H | 3.16353500  | 2.85901300  | -1.49339700 |
| H | 2.78861400  | 1.49744800  | -2.58330800 |
| H | 1.63215500  | 2.85229800  | -2.42025100 |

**INT11**

|   |             |             |            |
|---|-------------|-------------|------------|
| C | -4.13933300 | 0.22810500  | 2.04393100 |
| C | -2.99639400 | 0.81818600  | 1.21788500 |
| C | -2.84601600 | -1.41304400 | 1.21980600 |

|   |             |             |             |
|---|-------------|-------------|-------------|
| H | -5.13371900 | 0.52424200  | 1.69454400  |
| H | -2.39086700 | 1.52498500  | 1.79828000  |
| H | -4.06291400 | 0.41110300  | 3.12042000  |
| O | -4.01241800 | -1.20782600 | 1.84402300  |
| N | -2.17147400 | -0.36460700 | 0.90271400  |
| C | -3.44103000 | 1.44715600  | -0.09878000 |
| H | -2.53507400 | 1.66294700  | -0.68379700 |
| H | -3.98715700 | 0.68582100  | -0.67559200 |
| C | -4.28384000 | 2.67678800  | 0.07142500  |
| C | -5.59199600 | 2.71017400  | -0.41923000 |
| C | -3.78369400 | 3.80931500  | 0.72502900  |
| C | -6.38322700 | 3.84653100  | -0.26925100 |
| H | -5.98751100 | 1.83190700  | -0.93404900 |
| C | -4.57207500 | 4.94525500  | 0.87847300  |
| H | -2.76429800 | 3.80015000  | 1.11628700  |
| C | -5.87388700 | 4.96709900  | 0.38083600  |
| H | -7.39878900 | 3.85609700  | -0.66010600 |
| H | -4.16952500 | 5.81888800  | 1.38773200  |
| H | -6.48943300 | 5.85607500  | 0.50076900  |
| C | -2.53073600 | -2.86195400 | 1.01113500  |
| C | -3.75880300 | -3.55020000 | 0.34185900  |
| H | -4.59622400 | -3.45739900 | 1.04271100  |
| H | -3.51713200 | -4.61646200 | 0.26989100  |
| C | -2.30973000 | -3.53717300 | 2.40799900  |
| H | -3.19477600 | -3.29997400 | 3.01195600  |
| H | -2.31846000 | -4.61993700 | 2.23795600  |
| C | -4.14571600 | -3.01662900 | -1.01105300 |
| C | -5.06478500 | -1.96820300 | -1.13992600 |
| C | -3.63105200 | -3.59926400 | -2.17503900 |
| C | -5.46874000 | -1.52503800 | -2.39675800 |
| H | -5.49888900 | -1.52346600 | -0.24358400 |
| C | -4.03951300 | -3.16359600 | -3.43314300 |
| H | -2.93832900 | -4.43704100 | -2.08846500 |
| C | -4.96361200 | -2.12682000 | -3.54708600 |
| H | -6.20150400 | -0.72325500 | -2.47757800 |
| H | -3.64940000 | -3.64721300 | -4.32665400 |
| H | -5.29346800 | -1.79384400 | -4.52943100 |
| C | -1.04542000 | -3.13724900 | 3.11485800  |
| C | 0.02838600  | -4.03029900 | 3.19536400  |
| C | -0.91214600 | -1.87720900 | 3.71154600  |
| C | 1.20009300  | -3.67835300 | 3.86177400  |
| H | -0.06320300 | -5.01824600 | 2.74083600  |
| C | 0.26345200  | -1.51732200 | 4.36390300  |
| H | -1.74863500 | -1.17693000 | 3.69300700  |
| C | 1.32439900  | -2.41770100 | 4.43993200  |
| H | 2.01506300  | -4.39579900 | 3.94035200  |
| H | 0.34395200  | -0.53552400 | 4.82750900  |
| H | 2.23745600  | -2.14457900 | 4.96467300  |
| C | 0.12081600  | -4.45278600 | -0.88404900 |
| C | 0.70554400  | -3.04027700 | -0.79675900 |
| C | -1.29792700 | -3.09511600 | 0.18566500  |
| H | 0.76889300  | -5.22817600 | -0.46609500 |
| H | 0.96083600  | -2.64212900 | -1.78604100 |
| H | -0.19693600 | -4.74420100 | -1.89102100 |
| O | -1.07578600 | -4.39063200 | -0.05955200 |
| N | -0.42192700 | -2.25567700 | -0.24366400 |
| C | 1.92362600  | -2.93808200 | 0.13229300  |
| H | 2.31874400  | -1.91836100 | 0.04923900  |
| H | 1.58086400  | -3.06551600 | 1.16975100  |
| C | 2.97803900  | -3.96345700 | -0.18577900 |
| C | 3.39074000  | -4.87323500 | 0.79153400  |
| C | 3.53294500  | -4.06478100 | -1.46720800 |
| C | 4.34671400  | -5.84590600 | 0.50923900  |

|    |             |             |             |
|----|-------------|-------------|-------------|
| H  | 2.95555400  | -4.80830400 | 1.78992700  |
| C  | 4.48462700  | -5.03786300 | -1.75421200 |
| H  | 3.22899500  | -3.36632900 | -2.24569400 |
| C  | 4.89648600  | -5.93029100 | -0.76640300 |
| H  | 4.65977000  | -6.54003100 | 1.28683500  |
| H  | 4.91016900  | -5.09781200 | -2.75408200 |
| H  | 5.64271500  | -6.68923000 | -0.99173000 |
| Cu | -0.34875100 | -0.24031100 | 0.10165400  |
| C  | 0.39457800  | 3.77255600  | 1.38827100  |
| C  | -0.17939000 | 2.69252500  | 0.70795900  |
| C  | 0.18025200  | 1.39274000  | 1.03840300  |
| C  | 1.09488300  | 1.17205300  | 2.06784000  |
| C  | 1.65953000  | 2.25762000  | 2.73770500  |
| C  | 1.33211700  | 3.57921900  | 2.40669500  |
| H  | 0.09443900  | 4.78016400  | 1.10380200  |
| H  | -0.89574700 | 2.89577200  | -0.09155400 |
| H  | 1.38832100  | 0.15954400  | 2.35426400  |
| H  | 2.38049600  | 2.06204400  | 3.53326500  |
| C  | 2.01493600  | 4.73336800  | 3.13847400  |
| C  | 3.52131500  | 4.67559700  | 2.84889800  |
| H  | 3.71910700  | 4.78839800  | 1.77517000  |
| H  | 4.04655700  | 5.48304900  | 3.37428000  |
| H  | 3.96297600  | 3.72560600  | 3.17551800  |
| C  | 1.78290400  | 4.59778200  | 4.64876300  |
| H  | 2.27425600  | 5.41871500  | 5.18541600  |
| H  | 0.71374700  | 4.63037100  | 4.89167700  |
| H  | 2.18731200  | 3.65892400  | 5.04528900  |
| C  | 1.48804300  | 6.09506800  | 2.68911400  |
| H  | 1.99638200  | 6.89254700  | 3.24307300  |
| H  | 1.66761700  | 6.27433900  | 1.62165900  |
| H  | 0.41204400  | 6.20055200  | 2.87655200  |
| C  | 3.72208500  | 0.72600200  | -0.13878300 |
| H  | 3.01249600  | 0.16040800  | 0.47003600  |
| H  | 4.28966100  | 1.37193400  | 0.54142700  |
| C  | 2.99245200  | 1.50456400  | -1.18696400 |
| C  | 3.67080800  | 2.57184500  | -1.89659800 |
| C  | 4.70086200  | 3.30827200  | -1.26624200 |
| C  | 3.36806800  | 2.90645800  | -3.23876600 |
| C  | 5.34958000  | 4.34404000  | -1.91828200 |
| H  | 4.97899000  | 3.07942500  | -0.24031800 |
| C  | 4.03430300  | 3.93170500  | -3.89257900 |
| H  | 2.64220200  | 2.31014800  | -3.78684100 |
| C  | 5.01990400  | 4.66655100  | -3.23470400 |
| H  | 6.12426000  | 4.90293300  | -1.39771800 |
| H  | 3.79495500  | 4.14793900  | -4.93161600 |
| H  | 5.53858100  | 5.47275600  | -3.74840400 |
| C  | 1.67836900  | 1.08117200  | -1.46116400 |
| O  | 1.24907200  | -0.05120600 | -1.02005600 |
| N  | 0.82292200  | 1.90382900  | -2.16614900 |
| H  | 1.11533000  | 2.87215700  | -2.22849800 |
| C  | -0.49183400 | 1.65290400  | -2.56095000 |
| C  | -1.32170100 | 2.76191600  | -2.79909500 |
| C  | -1.00461800 | 0.36049500  | -2.77346200 |
| C  | -2.62613800 | 2.58679400  | -3.24421600 |
| H  | -0.92867800 | 3.76666000  | -2.64004900 |
| C  | -2.31854700 | 0.20297000  | -3.20442200 |
| H  | -0.36612100 | -0.50792000 | -2.64837500 |
| C  | -3.13619100 | 1.30491000  | -3.44293000 |
| H  | -3.25021200 | 3.46054900  | -3.42126700 |
| H  | -2.70103700 | -0.80356400 | -3.36541400 |
| H  | -4.16162000 | 1.16546300  | -3.78083500 |
| C  | 4.69953100  | -0.26744400 | -0.73145600 |
| F  | 5.17740000  | -1.09407800 | 0.21561200  |

|   |            |             |             |
|---|------------|-------------|-------------|
| F | 5.74671300 | 0.33991000  | -1.31553800 |
| F | 4.10292400 | -1.03033100 | -1.67349500 |

### TS10

|   |             |             |             |
|---|-------------|-------------|-------------|
| C | -4.39219900 | -0.98159800 | 0.49801000  |
| C | -3.20658500 | -0.13816400 | 0.00377400  |
| C | -2.49697400 | -2.18340300 | 0.58096600  |
| H | -5.15213300 | -1.16668100 | -0.27029800 |
| H | -3.01161300 | 0.70646600  | 0.68419400  |
| H | -4.87709600 | -0.59127800 | 1.39897400  |
| O | -3.81091500 | -2.26593500 | 0.84615700  |
| N | -2.06996400 | -1.06688800 | 0.11579100  |
| C | -3.31153300 | 0.38107600  | -1.42677900 |
| H | -2.28910800 | 0.55796100  | -1.79589700 |
| H | -3.70444700 | -0.42630500 | -2.06902100 |
| C | -4.11860200 | 1.64170600  | -1.57951200 |
| C | -3.80162000 | 2.54494300  | -2.59996900 |
| C | -5.17462000 | 1.96093800  | -0.72095300 |
| C | -4.51726300 | 3.72712900  | -2.76064600 |
| H | -2.97139100 | 2.31172900  | -3.26871900 |
| C | -5.89507200 | 3.14350800  | -0.87658700 |
| H | -5.44812500 | 1.28580100  | 0.09097400  |
| C | -5.56807700 | 4.03182000  | -1.89706800 |
| H | -4.25199300 | 4.41613500  | -3.56032200 |
| H | -6.71104000 | 3.37164100  | -0.19263100 |
| H | -6.12738400 | 4.95691700  | -2.01840000 |
| C | -1.74330800 | -3.43614300 | 0.92422800  |
| C | -2.38942500 | -4.64279200 | 0.17832200  |
| H | -3.44096700 | -4.68285600 | 0.48488300  |
| H | -1.90598500 | -5.54959500 | 0.55837300  |
| C | -1.88931900 | -3.67812400 | 2.46195300  |
| H | -2.95194200 | -3.86788000 | 2.65327100  |
| H | -1.34832100 | -4.60455600 | 2.68899100  |
| C | -2.27481500 | -4.57158100 | -1.31855400 |
| C | -3.21933500 | -3.86857800 | -2.07455400 |
| C | -1.22166500 | -5.20710800 | -1.98559700 |
| C | -3.11990700 | -3.80994500 | -3.46135300 |
| H | -4.06245800 | -3.39559700 | -1.56881900 |
| C | -1.11770100 | -5.14785200 | -3.37338600 |
| H | -0.49876900 | -5.78385500 | -1.40834100 |
| C | -2.06764500 | -4.44855700 | -4.11481600 |
| H | -3.87641200 | -3.27715400 | -4.03576400 |
| H | -0.30429700 | -5.66499400 | -3.87874700 |
| H | -1.99584900 | -4.41380200 | -5.20032100 |
| C | -1.39412800 | -2.54566800 | 3.31546900  |
| C | -0.03953100 | -2.44399300 | 3.65026500  |
| C | -2.27690200 | -1.57155400 | 3.79446500  |
| C | 0.42392100  | -1.40124500 | 4.44821200  |
| H | 0.65217100  | -3.21599900 | 3.30759800  |
| C | -1.82016500 | -0.53542600 | 4.60453200  |
| H | -3.33902000 | -1.65255400 | 3.55915500  |
| C | -0.46882600 | -0.44642000 | 4.93263200  |
| H | 1.47886000  | -1.34648400 | 4.71130400  |
| H | -2.52627100 | 0.19450600  | 4.99773700  |
| H | -0.11267600 | 0.35663900  | 5.57555600  |
| C | 1.72261900  | -4.37189400 | 0.36817900  |
| C | 1.82457400  | -2.87707900 | 0.04143600  |
| C | -0.27910600 | -3.38161200 | 0.58120000  |
| H | 2.38180600  | -4.69327800 | 1.18103100  |
| H | 2.17424800  | -2.72644200 | -0.99029000 |
| H | 1.86763700  | -5.03124600 | -0.49341900 |
| O | 0.35202500  | -4.54425200 | 0.81604200  |
| N | 0.42927600  | -2.40953400 | 0.13195000  |

|    |             |             |             |           |             |             |             |
|----|-------------|-------------|-------------|-----------|-------------|-------------|-------------|
| C  | 2.72719300  | -2.08465100 | 0.98994200  | H         | 1.45247300  | -0.96391000 | -1.92765900 |
| H  | 2.54467200  | -1.01495900 | 0.82545800  | C         | -1.13778500 | -0.94559500 | -4.14026300 |
| H  | 2.42262300  | -2.30132100 | 2.02455800  | H         | -1.82594100 | 0.80472300  | -5.19563400 |
| C  | 4.17510100  | -2.42061400 | 0.77518700  | H         | -0.20949400 | -2.49760100 | -2.96384900 |
| C  | 4.83642200  | -3.34298300 | 1.58980700  | H         | -1.82136600 | -1.62467800 | -4.64299000 |
| C  | 4.87343600  | -1.84586900 | -0.29236000 | C         | 4.16739500  | 2.08761200  | 1.68464700  |
| C  | 6.16347100  | -3.68819800 | 1.34340900  | F         | 4.16969300  | 2.28689400  | 3.01806400  |
| H  | 4.31133500  | -3.78039800 | 2.44100900  | F         | 5.33576200  | 2.54261300  | 1.20205100  |
| C  | 6.19785700  | -2.18687600 | -0.54150600 | F         | 4.14310600  | 0.75241900  | 1.48142600  |
| H  | 4.37427700  | -1.09935300 | -0.91491700 |           |             |             |             |
| C  | 6.84498900  | -3.11324800 | 0.27489900  | <b>6a</b> |             |             |             |
| H  | 6.66717100  | -4.40178900 | 1.99239300  | C         | -2.96893700 | -0.90022600 | 1.35255500  |
| H  | 6.73162200  | -1.72171600 | -1.36786500 | C         | -1.63370600 | -0.79229600 | 0.97017900  |
| H  | 7.88281600  | -3.37761300 | 0.08364700  | C         | -1.32205400 | -0.63142700 | -0.37326700 |
| Cu | -0.18080200 | -0.43747000 | -0.15368100 | C         | -2.32951200 | -0.58251300 | -1.33087200 |
| C  | -1.89456700 | 3.27914100  | 0.41964900  | C         | -3.65253300 | -0.69970100 | -0.92882400 |
| C  | -0.99494200 | 2.43713900  | -0.24125200 | C         | -4.00744000 | -0.85761400 | 0.41835200  |
| C  | -0.36076900 | 1.46104800  | 0.51148900  | H         | -3.19132400 | -1.02584600 | 2.40985700  |
| C  | -0.45086200 | 1.39986100  | 1.89678500  | H         | -0.83724000 | -0.83642100 | 1.71089000  |
| C  | -1.36364900 | 2.24474200  | 2.51890100  | H         | -2.06301100 | -0.45595900 | -2.37783400 |
| C  | -2.10822600 | 3.19513600  | 1.80038000  | H         | -4.43201700 | -0.66114400 | -1.68974200 |
| H  | -2.45192700 | 3.99500300  | -0.18178600 | C         | -5.48040800 | -0.97563300 | 0.80378600  |
| H  | -0.88056200 | 2.49986700  | -1.32203400 | C         | -6.09567600 | -2.19157900 | 0.09848800  |
| H  | 0.13019900  | 0.67863500  | 2.47291900  | H         | -5.59050700 | -3.11937400 | 0.39415300  |
| H  | -1.48497000 | 2.15968100  | 3.59849900  | H         | -7.15889300 | -2.28839400 | 0.35500300  |
| C  | -3.14766800 | 4.04415200  | 2.52650900  | H         | -6.02490600 | -2.10833200 | -0.99270100 |
| C  | -2.53183800 | 4.70152800  | 3.76765400  | C         | -6.22541800 | 0.29098800  | 0.36216400  |
| H  | -1.69214200 | 5.35335500  | 3.49858900  | H         | -7.28996800 | 0.22192400  | 0.62226400  |
| H  | -3.28185400 | 5.31585700  | 4.28002900  | H         | -5.81447000 | 1.18324200  | 0.85024800  |
| H  | -2.16574300 | 3.96675700  | 4.49424500  | H         | -6.15879200 | 0.44550500  | -0.72148200 |
| C  | -4.29092100 | 3.11147400  | 2.95672100  | C         | -5.67090600 | -1.14592900 | 2.30998000  |
| H  | -5.06092100 | 3.66807500  | 3.50564600  | H         | -6.73928200 | -1.22693000 | 2.54428400  |
| H  | -4.76734300 | 2.65089700  | 2.08004600  | H         | -5.18236500 | -2.05434700 | 2.68447900  |
| H  | -3.93071700 | 2.30438000  | 3.60902100  | H         | -5.27477600 | -0.29083900 | 2.87209900  |
| C  | -3.72316900 | 5.14185000  | 1.63297400  | C         | 2.12052100  | -2.17636100 | -0.06280900 |
| H  | -4.44448100 | 5.74159100  | 2.19994100  | H         | 1.11593800  | -2.58333500 | -0.21384300 |
| H  | -2.94300600 | 5.82244100  | 1.26961300  | H         | 2.59167300  | -2.75869200 | 0.73891600  |
| H  | -4.25207100 | 4.73140700  | 0.76363600  | C         | 2.06469300  | -0.71411700 | 0.27058700  |
| C  | 2.98033800  | 2.77281900  | 1.04821800  | C         | 3.22741900  | -0.07075300 | 0.90805800  |
| H  | 2.08601400  | 2.39756400  | 1.55494800  | C         | 3.96176500  | -0.72774600 | 1.90849900  |
| H  | 3.06874800  | 3.83605700  | 1.30138500  | C         | 3.65856900  | 1.21133800  | 0.52105400  |
| C  | 2.87900600  | 2.57420400  | -0.43470500 | C         | 5.06311700  | -0.12685400 | 2.50732000  |
| C  | 3.75863200  | 3.33106700  | -1.33182000 | H         | 3.65930000  | -1.72250400 | 2.23392400  |
| C  | 4.18455600  | 4.63141900  | -1.00058700 | C         | 4.75882600  | 1.81213800  | 1.12057900  |
| C  | 4.23716700  | 2.78273100  | -2.53927400 | H         | 3.13563100  | 1.72543800  | -0.28492500 |
| C  | 5.01700200  | 5.35481200  | -1.84423900 | C         | 5.46673300  | 1.14841200  | 2.12057700  |
| H  | 3.84857600  | 5.09405900  | -0.07467400 | H         | 5.60910800  | -0.66019100 | 3.28378000  |
| C  | 5.07635700  | 3.50490700  | -3.37733600 | H         | 5.07520200  | 2.80041500  | 0.79090600  |
| H  | 3.97202100  | 1.75966900  | -2.80088600 | H         | 6.33150100  | 1.61685200  | 2.58635800  |
| C  | 5.46680500  | 4.79903500  | -3.03949300 | C         | 0.94014900  | -0.01636900 | -0.03026900 |
| H  | 5.31905600  | 6.36164600  | -1.56292900 | O         | -0.01323600 | -0.58536900 | -0.83500400 |
| H  | 5.44090000  | 3.04645700  | -4.29468300 | N         | 0.63054300  | 1.23665700  | 0.46551700  |
| H  | 6.12511200  | 5.36417800  | -3.69548500 | H         | 1.16748900  | 1.50261700  | 1.28146600  |
| C  | 1.93862800  | 1.68038200  | -0.89620700 | C         | 0.06509500  | 2.30129500  | -0.25173800 |
| O  | 1.37797600  | 0.82635300  | -0.04672400 | C         | -0.29117300 | 3.45544400  | 0.45809400  |
| N  | 1.49141900  | 1.70295600  | -2.21248700 | C         | -0.14112700 | 2.25736100  | -1.63653100 |
| H  | 1.66002000  | 2.57737100  | -2.69603200 | C         | -0.84583200 | 4.54279200  | -0.20314800 |
| C  | 0.63030300  | 0.80864600  | -2.83767600 | H         | -0.13424000 | 3.48809400  | 1.53608800  |
| C  | -0.28319800 | 1.29091000  | -3.78853500 | C         | -0.71137400 | 3.34920300  | -2.28266900 |
| C  | 0.66202800  | -0.57086900 | -2.56565000 | H         | 0.15186200  | 1.37694100  | -2.20162000 |
| C  | -1.13913300 | 0.41489700  | -4.44602300 | C         | -1.06709200 | 4.49619200  | -1.57826000 |
| H  | -0.30324300 | 2.35704300  | -4.01734500 | H         | -1.11317800 | 5.43199400  | 0.36517200  |
| C  | -0.23523300 | -1.43239100 | -3.19837800 | H         | -0.86536000 | 3.30220300  | -3.35950100 |

|   |             |             |             |
|---|-------------|-------------|-------------|
| H | -1.50845200 | 5.34575100  | -2.09449700 |
| C | 2.90756300  | -2.46599700 | -1.31905000 |
| F | 2.91723400  | -3.79053800 | -1.58423900 |
| F | 4.19248600  | -2.07196000 | -1.21002400 |
| F | 2.38868000  | -1.84445700 | -2.39455300 |

**INT4'' S\*\*2 = 0.75**

|   |             |             |             |
|---|-------------|-------------|-------------|
| C | 1.77018400  | -1.05034000 | 0.97517500  |
| H | 1.51800300  | -2.06255000 | 1.30282900  |
| H | 2.19858100  | -0.50988600 | 1.82818600  |
| C | 0.54041300  | -0.38284900 | 0.43904100  |
| C | 0.54218400  | 1.02652200  | 0.13603400  |
| C | -0.30770900 | 1.57433300  | -0.85709800 |
| C | 1.42447100  | 1.91804700  | 0.79270300  |
| C | -0.29049200 | 2.92748400  | -1.15098600 |
| H | -0.96360800 | 0.91457500  | -1.41942800 |
| C | 1.42527200  | 3.27315900  | 0.50611900  |
| H | 2.10728900  | 1.53863800  | 1.54941200  |
| C | 0.56700400  | 3.78937500  | -0.46556000 |
| H | -0.94479300 | 3.31435000  | -1.92975600 |
| H | 2.10381100  | 3.93447600  | 1.04149100  |
| H | 0.57528900  | 4.85304200  | -0.69530400 |
| C | -0.56021000 | -1.30676400 | 0.12374700  |
| O | -0.29781500 | -2.49798400 | -0.08391100 |
| C | 2.87621700  | -1.19612400 | -0.04865000 |
| F | 3.89673900  | -1.91607000 | 0.46059700  |
| F | 3.38372900  | -0.00113000 | -0.42256200 |
| F | 2.45252700  | -1.81419400 | -1.16082100 |
| C | -1.98369100 | -0.86334100 | 0.12153700  |
| C | -2.90312600 | -1.60808600 | -0.62689300 |
| C | -2.44829100 | 0.19313800  | 0.91576300  |
| C | -4.25285900 | -1.28089400 | -0.61257800 |
| H | -2.53156500 | -2.44672800 | -1.21207300 |
| C | -3.80276200 | 0.50542000  | 0.94752700  |
| H | -1.74581500 | 0.76309000  | 1.52178300  |
| C | -4.70556600 | -0.22320600 | 0.17544800  |
| H | -4.95762800 | -1.85613500 | -1.21025900 |
| H | -4.15567300 | 1.31963200  | 1.57769700  |
| H | -5.76455100 | 0.02865700  | 0.19379700  |

**INT11''**

|   |             |             |             |
|---|-------------|-------------|-------------|
| C | 3.31287300  | -2.62543100 | 1.42445300  |
| C | 1.90052100  | -2.28373200 | 0.94722600  |
| C | 3.20661400  | -0.47012600 | 0.80142200  |
| H | 3.78145800  | -3.44496800 | 0.86985000  |
| H | 1.14360300  | -2.50028600 | 1.71150000  |
| H | 3.39041300  | -2.82166100 | 2.49807700  |
| O | 4.08219400  | -1.41675200 | 1.15426900  |
| N | 1.97146800  | -0.82379600 | 0.74798900  |
| C | 1.50956200  | -2.92689100 | -0.38490700 |
| H | 0.55697300  | -2.47481200 | -0.70484300 |
| H | 2.25563800  | -2.63244600 | -1.13885400 |
| C | 1.39347900  | -4.42014800 | -0.31223800 |
| C | 2.34949700  | -5.23980900 | -0.91766100 |
| C | 0.33424100  | -5.01787600 | 0.38014300  |
| C | 2.25452800  | -6.62719200 | -0.83490700 |
| H | 3.17025800  | -4.77913700 | -1.47228600 |
| C | 0.23706300  | -6.40280600 | 0.46500800  |
| H | -0.42252600 | -4.38537700 | 0.84961500  |
| C | 1.19804100  | -7.21067800 | -0.14145000 |
| H | 3.00446300  | -7.25244900 | -1.31536900 |
| H | -0.59350800 | -6.85605100 | 1.00286800  |
| H | 1.12002500  | -8.29383300 | -0.07625800 |

|    |             |             |             |
|----|-------------|-------------|-------------|
| C  | 3.82497800  | 0.87267800  | 0.55397000  |
| C  | 5.06340800  | 0.70469200  | -0.37679000 |
| H  | 5.77788700  | 0.06939100  | 0.15850800  |
| H  | 5.52162000  | 1.69631900  | -0.46747600 |
| C  | 4.32842300  | 1.43935200  | 1.92393300  |
| H  | 5.09900700  | 0.74642800  | 2.28322900  |
| H  | 4.82517300  | 2.39244400  | 1.70736000  |
| C  | 4.78319300  | 0.13506000  | -1.74141600 |
| C  | 4.87262900  | -1.24204600 | -1.97893900 |
| C  | 4.48594400  | 0.98008900  | -2.81687700 |
| C  | 4.69543300  | -1.75713500 | -3.26050800 |
| H  | 5.12824200  | -1.91063200 | -1.15629800 |
| C  | 4.31286200  | 0.46877600  | -4.10033100 |
| H  | 4.44386700  | 2.05740900  | -2.65143800 |
| C  | 4.42717300  | -0.90152200 | -4.32678100 |
| H  | 4.79303600  | -2.82814700 | -3.43175700 |
| H  | 4.11185900  | 1.14388400  | -4.92987000 |
| H  | 4.31267700  | -1.30032800 | -5.33299700 |
| C  | 3.25386600  | 1.61637000  | 2.95794700  |
| C  | 2.51819500  | 2.80411500  | 3.02924600  |
| C  | 2.96183800  | 0.59223400  | 3.86553100  |
| C  | 1.51610300  | 2.96591000  | 3.98287800  |
| H  | 2.75646300  | 3.62132100  | 2.34534800  |
| C  | 1.96705700  | 0.75302500  | 4.82606500  |
| H  | 3.54497000  | -0.32972600 | 3.83484300  |
| C  | 1.24026300  | 1.94073900  | 4.88550400  |
| H  | 0.96063000  | 3.90109000  | 4.03273200  |
| H  | 1.76297100  | -0.04823600 | 5.53413900  |
| H  | 0.46738900  | 2.07210500  | 5.64030800  |
| C  | 2.40200100  | 3.87009700  | -0.93440200 |
| C  | 1.11944200  | 3.04110300  | -0.79852600 |
| C  | 2.87110600  | 1.86124300  | -0.05839600 |
| H  | 2.36652100  | 4.82853200  | -0.40714000 |
| H  | 0.61237900  | 2.91426700  | -1.76325500 |
| H  | 2.72270800  | 4.03776000  | -1.96737900 |
| O  | 3.42653100  | 3.05436000  | -0.29652000 |
| N  | 1.62712400  | 1.72638100  | -0.35620200 |
| C  | 0.12287600  | 3.60412200  | 0.22460200  |
| H  | -0.75395000 | 2.94440900  | 0.24577300  |
| H  | 0.58783900  | 3.55935300  | 1.22022600  |
| C  | -0.26889200 | 5.01705600  | -0.10523800 |
| C  | 0.17150900  | 6.08250800  | 0.68523100  |
| C  | -1.03916000 | 5.29699400  | -1.23966800 |
| C  | -0.15604000 | 7.39694200  | 0.36064100  |
| H  | 0.77004500  | 5.87521700  | 1.57504400  |
| C  | -1.36634200 | 6.60856000  | -1.56754500 |
| H  | -1.40091300 | 4.47599700  | -1.85872100 |
| C  | -0.92537900 | 7.66201800  | -0.76847200 |
| H  | 0.18840500  | 8.21349900  | 0.99215200  |
| H  | -1.97414600 | 6.80991300  | -2.44747800 |
| H  | -1.18502100 | 8.68707400  | -1.02419800 |
| Cu | 0.38564300  | 0.20640400  | 0.15690000  |
| C  | -2.51235600 | -2.32582000 | 1.99829700  |
| C  | -1.70742300 | -1.76260700 | 0.99981600  |
| C  | -0.82766200 | -0.74929800 | 1.32877300  |
| C  | -0.72749900 | -0.29066600 | 2.63889800  |
| C  | -1.55102500 | -0.84856800 | 3.61647300  |
| C  | -2.45783900 | -1.87569900 | 3.32010000  |
| H  | -3.19068300 | -3.13069500 | 1.72003200  |
| H  | -1.79920200 | -2.12940000 | -0.02384500 |
| H  | -0.03244800 | 0.50447500  | 2.91448000  |
| H  | -1.48371100 | -0.46012000 | 4.63407100  |
| C  | -3.34076400 | -2.44676800 | 4.42848600  |



|   |             |             |             |   |             |             |             |
|---|-------------|-------------|-------------|---|-------------|-------------|-------------|
| C | -4.22316400 | -1.32485800 | 4.99227000  | H | 4.95891400  | -2.10383400 | -0.01327300 |
| H | -4.87009000 | -0.89869600 | 4.21541800  | C | 6.79715300  | 0.62841100  | 0.80423800  |
| H | -4.86691200 | -1.71015900 | 5.79264500  | H | 6.11852100  | 2.25053900  | 2.05129500  |
| H | -3.62604200 | -0.50722800 | 5.41356400  | H | 7.17955100  | -1.12352900 | -0.39228700 |
| C | -2.45363400 | -3.00437600 | 5.54938100  | H | 7.77884200  | 1.06333900  | 0.62951100  |
| H | -3.07196500 | -3.41002300 | 6.35959700  | C | -0.82570700 | -3.85072700 | 0.45743700  |
| H | -1.80819800 | -3.81220900 | 5.18268600  | C | -0.97924700 | -4.76736300 | 1.70709900  |
| H | -1.80851300 | -2.23124600 | 5.98402200  | H | -0.20580500 | -5.54071000 | 1.63089100  |
| C | -4.24606700 | -3.56918200 | 3.92429400  | H | -1.94835800 | -5.27083600 | 1.61473000  |
| H | -4.85813900 | -3.95215800 | 4.74876000  | C | -0.96031800 | -4.73977200 | -0.82404000 |
| H | -4.93308000 | -3.22339400 | 3.14172000  | H | -0.20510400 | -5.53015900 | -0.74217200 |
| H | -3.67060200 | -4.41370500 | 3.52451900  | H | -1.94363200 | -5.22146800 | -0.77399600 |
| C | -3.73867700 | 0.76823900  | -0.08823200 | C | -0.88189000 | -4.05471600 | 3.02800200  |
| H | -2.94705200 | 0.83289400  | 0.66501100  | C | 0.36232100  | -3.82190500 | 3.62554100  |
| H | -4.57677600 | 0.21746500  | 0.35511900  | C | -2.03527400 | -3.63349600 | 3.69855000  |
| C | -3.22949400 | 0.08127500  | -1.32027500 | C | 0.45167200  | -3.20218600 | 4.86859400  |
| C | -4.18031900 | -0.44229600 | -2.28986500 | H | 1.26734200  | -4.17061500 | 3.12601500  |
| C | -5.42916600 | -0.95617800 | -1.88494200 | C | -1.95013200 | -3.02009400 | 4.94630400  |
| C | -3.89794600 | -0.42169700 | -3.67261600 | H | -3.01156700 | -3.82898500 | 3.25311900  |
| C | -6.33030500 | -1.46080800 | -2.81105400 | C | -0.70569900 | -2.80686400 | 5.53622300  |
| H | -5.68565500 | -0.98851600 | -0.82777800 | H | 1.42702300  | -3.04741800 | 5.32728200  |
| C | -4.80707200 | -0.91136600 | -4.59657200 | H | -2.85860100 | -2.72382900 | 5.46718600  |
| H | -2.96273500 | 0.01590100  | -4.01607200 | H | -0.63927300 | -2.34037700 | 6.51747100  |
| C | -6.02552600 | -1.44136700 | -4.17115500 | C | -0.79972600 | -3.98172800 | -2.11144000 |
| H | -7.27971400 | -1.86821600 | -2.47039700 | C | -1.89921900 | -3.36858700 | -2.72171500 |
| H | -4.57188100 | -0.86767600 | -5.65784100 | C | 0.45539700  | -3.85893900 | -2.71788500 |
| H | -6.73883800 | -1.82552400 | -4.89701900 | C | -1.75109100 | -2.64922500 | -3.90508700 |
| C | -1.84629400 | 0.06855700  | -1.50716700 | H | -2.88900000 | -3.48175700 | -2.27497800 |
| O | -1.12383000 | 0.90251300  | -0.80269100 | C | 0.60590700  | -3.14941300 | -3.90591900 |
| C | -4.23522100 | 2.17529700  | -0.33529200 | H | 1.31570000  | -4.35628700 | -2.26770100 |
| F | -4.64649300 | 2.73890700  | 0.81475500  | C | -0.49639900 | -2.53914100 | -4.50136700 |
| F | -5.26788800 | 2.20348800  | -1.19699000 | H | -2.62098600 | -2.18974600 | -4.37232600 |
| F | -3.26559000 | 2.96254600  | -0.84699500 | H | 1.58519800  | -3.08799900 | -4.37803000 |
| C | -1.09095900 | -0.87747400 | -2.36404100 | H | -0.38231200 | -1.99348400 | -5.43635600 |
| C | 0.17302000  | -0.49464600 | -2.84074000 | C | -4.12076600 | -2.30931900 | 0.42820500  |
| C | -1.51872500 | -2.19592500 | -2.59270300 | C | -3.26390000 | -1.04885500 | 0.25149900  |
| C | 0.97781300  | -1.39406800 | -3.53068800 | C | -1.93988300 | -2.83760500 | 0.44278000  |
| H | 0.51628600  | 0.52653100  | -2.67434300 | H | -4.81474500 | -2.49127700 | -0.39922500 |
| C | -0.70354200 | -3.10110300 | -3.26212600 | H | -3.45903300 | -0.32393900 | 1.05486100  |
| H | -2.49161700 | -2.51607100 | -2.22162900 | H | -4.67116500 | -2.34964200 | 1.37284800  |
| C | 0.54770700  | -2.70308000 | -3.73367800 | O | -3.15767400 | -3.39905700 | 0.44575300  |
| H | 1.94900900  | -1.07173200 | -3.89821300 | N | -1.88670100 | -1.55529700 | 0.39135800  |
| H | -1.04012600 | -4.12605100 | -3.40430300 | C | -3.42508700 | -0.34571700 | -1.10230600 |
| H | 1.18841500  | -3.41486600 | -4.25248500 | H | -2.72364100 | 0.50003800  | -1.13099000 |

## TS10''

|   |            |             |             |    |             |             |             |
|---|------------|-------------|-------------|----|-------------|-------------|-------------|
| C | 2.78929900 | -3.41762700 | 0.42716300  | C  | -5.69527900 | -0.61147900 | -2.16467300 |
| C | 2.36988000 | -1.94123800 | 0.34427600  | C  | -5.32807800 | 1.25207900  | -0.68666400 |
| C | 0.54932900 | -3.24636100 | 0.45093400  | C  | -7.01782900 | -0.21363000 | -2.34480500 |
| H | 3.35782500 | -3.66334900 | 1.33146900  | H  | -5.31514800 | -1.49136400 | -2.68924000 |
| H | 2.65736700 | -1.49629000 | -0.62264100 | C  | -6.64838900 | 1.65195900  | -0.86432400 |
| H | 3.33250300 | -3.78349600 | -0.45012800 | H  | -4.66007300 | 1.84145000  | -0.05727100 |
| O | 1.53700400 | -4.15391800 | 0.49234000  | C  | -7.49700900 | 0.91831300  | -1.69157900 |
| N | 0.90185600 | -2.01569300 | 0.37220700  | H  | -7.67199000 | -0.78485500 | -3.00048100 |
| C | 2.87521600 | -1.04640100 | 1.47378800  | H  | -7.01515300 | 2.54508100  | -0.36239400 |
| H | 2.16421200 | -0.21292500 | 1.59297700  | H  | -8.52838700 | 1.23423000  | -1.83297500 |
| H | 2.81385000 | -1.60301800 | 2.42493800  | Cu | -0.22070500 | -0.40038700 | 0.07182000  |
| C | 4.25655300 | -0.49216100 | 1.24872500  | C  | 3.23714700  | 1.22380600  | -1.54236800 |
| C | 4.60977300 | 0.73571300  | 1.81864000  | C  | 2.12738700  | 1.31693900  | -0.69973200 |
| C | 5.20100300 | -1.14795400 | 0.45381400  | C  | 0.96291500  | 0.68797800  | -1.09708800 |
| C | 5.86601800 | 1.29219800  | 1.60149600  | C  | 0.79246100  | 0.14360600  | -2.36446300 |
| H | 3.87593500 | 1.26201500  | 2.43143300  | C  | 1.92011600  | 0.06451900  | -3.17887700 |
| C | 6.46122700 | -0.59563800 | 0.23300900  | C  | 3.16366500  | 0.58443100  | -2.78549100 |

|   |             |             |             |
|---|-------------|-------------|-------------|
| H | 4.17541700  | 1.65226700  | -1.19471200 |
| H | 2.20847200  | 1.81583900  | 0.26529300  |
| H | -0.16358500 | -0.26596900 | -2.69389400 |
| H | 1.81382400  | -0.41489100 | -4.15196500 |
| C | 4.38151500  | 0.39655500  | -3.68604200 |
| C | 4.07191200  | 0.86988300  | -5.11141900 |
| H | 3.80460500  | 1.93312500  | -5.12899400 |
| H | 4.95024000  | 0.73435900  | -5.75390200 |
| H | 3.24727300  | 0.31039600  | -5.56849300 |
| C | 4.72045200  | -1.10198400 | -3.70837900 |
| H | 5.58779700  | -1.29421800 | -4.35234100 |
| H | 4.96257200  | -1.46406300 | -2.69935300 |
| H | 3.88206100  | -1.69978800 | -4.08955200 |
| C | 5.60084300  | 1.16306200  | -3.17543100 |
| H | 6.44411000  | 1.01665200  | -3.86011600 |
| H | 5.40934500  | 2.24175800  | -3.11579700 |
| H | 5.92024900  | 0.81737000  | -2.18396400 |
| C | -0.44245200 | 3.99949900  | -1.29692200 |
| H | -0.09361000 | 3.15637200  | -1.90203400 |
| H | 0.12878900  | 4.88832600  | -1.58742200 |
| C | -0.29130000 | 3.71509700  | 0.16936800  |
| C | -0.21871800 | 4.84857100  | 1.10117400  |
| C | 0.56149200  | 5.97744200  | 0.80079200  |
| C | -0.94154200 | 4.84766600  | 2.30630600  |
| C | 0.64131300  | 7.04681200  | 1.68482600  |
| H | 1.13636800  | 6.00858800  | -0.12402900 |
| C | -0.86906600 | 5.92079500  | 3.18401700  |
| H | -1.58635900 | 4.00132600  | 2.53776200  |
| C | -0.07278700 | 7.02368900  | 2.88043700  |
| H | 1.26263000  | 7.90471000  | 1.43599000  |
| H | -1.44903900 | 5.90327200  | 4.10459200  |
| H | -0.01909200 | 7.86638200  | 3.56630900  |
| C | -0.34491800 | 2.41164000  | 0.58344800  |
| O | -0.68944300 | 1.47680900  | -0.32958700 |
| C | -1.87705200 | 4.27254200  | -1.69510500 |
| F | -1.96823800 | 4.50497900  | -3.01680700 |
| F | -2.37550100 | 5.34462300  | -1.05403800 |
| F | -2.68821500 | 3.22895500  | -1.41357900 |
| C | -0.00064400 | 1.89279300  | 1.92461700  |
| C | -0.73491200 | 0.81608900  | 2.44603400  |
| C | 1.10759300  | 2.35426100  | 2.65129500  |
| C | -0.35848700 | 0.18859000  | 3.63002800  |
| H | -1.63830700 | 0.49511600  | 1.92802400  |
| C | 1.47655900  | 1.73783900  | 3.84265800  |
| H | 1.68362200  | 3.19690300  | 2.26843400  |
| C | 0.75576100  | 0.64522400  | 4.32823500  |
| H | -0.94084200 | -0.65073800 | 4.00684000  |
| H | 2.34072400  | 2.10689300  | 4.39263100  |
| H | 1.05661800  | 0.15977000  | 5.25507400  |

**6c**

|   |            |             |             |
|---|------------|-------------|-------------|
| C | 2.82248000 | -0.78044100 | 1.09704700  |
| C | 1.53588900 | -0.83400500 | 0.56343800  |
| C | 1.32825900 | -0.46412500 | -0.76236900 |
| C | 2.40261100 | -0.04217500 | -1.54538300 |
| C | 3.67478200 | -0.00373300 | -0.99414200 |
| C | 3.92058000 | -0.36858500 | 0.33778600  |
| H | 2.95790200 | -1.07680700 | 2.13495600  |
| H | 0.69629600 | -1.15842300 | 1.17638600  |
| H | 2.21773200 | 0.25244400  | -2.57590300 |
| H | 4.50183300 | 0.32901500  | -1.62169500 |
| C | 5.34217700 | -0.30170400 | 0.89115400  |
| C | 5.86209900 | 1.13822500  | 0.78755100  |

|   |             |             |             |
|---|-------------|-------------|-------------|
| H | 5.23906000  | 1.82780000  | 1.37044500  |
| H | 6.88951900  | 1.20568000  | 1.16895300  |
| H | 5.87037500  | 1.49433000  | -0.24967900 |
| C | 6.25224100  | -1.22364600 | 0.06876500  |
| H | 7.28357300  | -1.18148200 | 0.44319300  |
| H | 5.91457400  | -2.26594600 | 0.12368700  |
| H | 6.27249500  | -0.93669600 | -0.98951900 |
| C | 5.41271200  | -0.73552400 | 2.35417900  |
| H | 6.44735700  | -0.67330500 | 2.71267600  |
| H | 4.80127100  | -0.09438500 | 3.00162800  |
| H | 5.07934700  | -1.77207100 | 2.49042300  |
| C | -0.51252500 | 1.93623200  | -0.12627700 |
| H | 0.56250000  | 1.72467200  | -0.06676100 |
| H | -0.73232300 | 2.64724900  | 0.67753300  |
| C | -1.35169700 | 0.69268200  | 0.04767800  |
| C | -2.44128400 | 0.76649800  | 1.04183000  |
| C | -3.25678200 | 1.90469000  | 1.13784600  |
| C | -2.64414800 | -0.26845800 | 1.96997100  |
| C | -4.25607200 | 1.98975200  | 2.10210100  |
| H | -3.11813100 | 2.72234000  | 0.43377500  |
| C | -3.63976300 | -0.18163400 | 2.93369400  |
| H | -2.00401000 | -1.14898700 | 1.93000600  |
| C | -4.45540500 | 0.94702000  | 3.00239600  |
| H | -4.88323100 | 2.87851800  | 2.14772000  |
| H | -3.77211900 | -0.99563100 | 3.64442900  |
| H | -5.23362900 | 1.01631300  | 3.76012900  |
| C | -1.05449100 | -0.44881600 | -0.62817700 |
| O | 0.10448500  | -0.53477600 | -1.38565600 |
| C | -0.73172500 | 2.67926200  | -1.42390800 |
| F | -0.04571100 | 3.84179400  | -1.41532200 |
| F | -2.03461700 | 2.99143300  | -1.61911700 |
| F | -0.33097700 | 1.98734200  | -2.50320400 |
| C | -1.87643700 | -1.65995400 | -0.75771600 |
| C | -1.24737100 | -2.90754400 | -0.88218800 |
| C | -3.27750300 | -1.60455300 | -0.81793100 |
| C | -1.99800700 | -4.06961200 | -1.01991200 |
| H | -0.16009300 | -2.95805800 | -0.86955700 |
| C | -4.02369900 | -2.76560000 | -0.96381700 |
| H | -3.77675000 | -0.63936100 | -0.76032200 |
| C | -3.38835200 | -4.00383200 | -1.05747500 |
| H | -1.49358600 | -5.03042600 | -1.10523800 |
| H | -5.10907300 | -2.70372100 | -1.01698700 |
| H | -3.97644000 | -4.91248400 | -1.17309100 |

**TS2'** S\*\*2 = 0.75

|   |             |             |             |
|---|-------------|-------------|-------------|
| C | 1.53479600  | -0.10021200 | 1.72081700  |
| C | 0.68803900  | -0.16197900 | 0.67431500  |
| C | -0.00184400 | 1.02565200  | 0.14068800  |
| C | -0.04375200 | 1.25603600  | -1.24204300 |
| C | -0.61656000 | 1.95103300  | 0.99338300  |
| C | -0.67928200 | 2.38069800  | -1.75402600 |
| H | 0.43926400  | 0.54672400  | -1.91406300 |
| C | -1.26079500 | 3.07098700  | 0.48001500  |
| H | -0.61517200 | 1.76127600  | 2.06682300  |
| C | -1.29492600 | 3.28959400  | -0.89546300 |
| H | -0.69411800 | 2.54967300  | -2.82954300 |
| H | -1.74676400 | 3.77211100  | 1.15641400  |
| H | -1.80187400 | 4.16490700  | -1.29761100 |
| C | 0.60367000  | -1.47292000 | -0.05277900 |
| O | 1.59417100  | -2.17896400 | -0.21495600 |
| N | -0.63136200 | -1.81341800 | -0.57538100 |
| C | -1.84994400 | -1.26498800 | -0.08328100 |
| C | -2.78577500 | -0.73320600 | -0.97349400 |

|   |             |             |             |
|---|-------------|-------------|-------------|
| C | -2.11679800 | -1.25708600 | 1.28746700  |
| C | -3.96525400 | -0.17831000 | -0.49276800 |
| H | -2.56250000 | -0.72436900 | -2.03943400 |
| C | -3.29548800 | -0.69121800 | 1.76443700  |
| H | -1.38875200 | -1.68729600 | 1.97332100  |
| C | -4.22185600 | -0.15026200 | 0.87743500  |
| H | -4.68206400 | 0.24914100  | -1.19140200 |
| H | -3.49268300 | -0.68195500 | 2.83494300  |
| H | -5.14370700 | 0.29107700  | 1.25094000  |
| C | -0.71664200 | -3.00547600 | -1.40226100 |
| H | -1.03395500 | -3.87766600 | -0.81474600 |
| H | -1.44131700 | -2.84688600 | -2.20754100 |
| H | 0.27108700  | -3.20674700 | -1.81940500 |
| C | 3.73617400  | 0.12025800  | 0.20891100  |
| F | 4.40516400  | 1.17363800  | 0.67551000  |
| F | 3.24726200  | 0.38463500  | -0.99528000 |
| F | 4.51816300  | -0.94608800 | 0.17818800  |
| H | 1.71219100  | 0.83091900  | 2.25609900  |
| H | 2.02865500  | -0.99654400 | 2.08865700  |

**1b**

|   |             |             |             |
|---|-------------|-------------|-------------|
| C | 1.08288500  | -2.14402800 | -1.91893200 |
| H | 2.10460600  | -2.22685100 | -2.28113100 |
| H | 0.29864000  | -2.62354900 | -2.50132600 |
| C | 0.81317500  | -1.49919400 | -0.77550300 |
| C | -0.55133600 | -1.39068800 | -0.22171100 |
| C | -0.77114400 | -1.54705800 | 1.15374200  |
| C | -1.65133200 | -1.13716200 | -1.05000100 |
| C | -2.05383800 | -1.46123100 | 1.68233500  |
| H | 0.07675300  | -1.74194700 | 1.81045500  |
| C | -2.93325300 | -1.04165400 | -0.52044400 |
| H | -1.48364300 | -0.97859700 | -2.11526200 |
| C | -3.13948600 | -1.20376000 | 0.84781100  |
| H | -2.20694900 | -1.59404900 | 2.75214000  |
| H | -3.77456500 | -0.82904000 | -1.17797900 |
| H | -4.14265100 | -1.12514300 | 1.26303800  |
| C | 1.97668400  | -0.93437800 | -0.00411500 |
| O | 3.03059400  | -1.54558600 | 0.12220100  |
| N | 1.77199600  | 0.29637200  | 0.59855400  |
| C | 0.77555900  | 1.21433300  | 0.15867600  |
| C | -0.09844200 | 1.79057500  | 1.08350900  |
| C | 0.66825500  | 1.54648300  | -1.19342000 |
| C | -1.08331800 | 2.67184600  | 0.65493600  |
| H | -0.02143700 | 1.51236300  | 2.13371600  |
| C | -0.32703100 | 2.42137900  | -1.61907000 |
| H | 1.36200800  | 1.10404300  | -1.90633100 |
| C | -1.20495500 | 2.98578700  | -0.69811100 |
| H | -1.77079500 | 3.10390300  | 1.37977300  |
| H | -0.40908200 | 2.66887100  | -2.67598500 |
| H | -1.98192200 | 3.67070200  | -1.03185800 |
| C | 2.82992400  | 0.81468100  | 1.44997900  |
| H | 3.38591900  | -0.02697400 | 1.86577100  |
| H | 3.52761000  | 1.44736300  | 0.88413300  |
| H | 2.39271200  | 1.41341300  | 2.25526800  |

**INT4' S\*\*2 = 0.75**

|   |             |             |             |
|---|-------------|-------------|-------------|
| C | 2.07133800  | -0.47303000 | 1.01758500  |
| C | 0.84678700  | -0.37229800 | 0.15998800  |
| C | 0.32364100  | 0.89896400  | -0.26045500 |
| C | -0.51526500 | 1.02052500  | -1.39484900 |
| C | 0.61999000  | 2.08634500  | 0.45154900  |
| C | -1.04575400 | 2.24288800  | -1.76987800 |
| H | -0.73206500 | 0.13488800  | -1.98835200 |

|   |             |             |             |
|---|-------------|-------------|-------------|
| C | 0.07838000  | 3.30471700  | 0.07725900  |
| H | 1.27411500  | 2.04383300  | 1.31912600  |
| C | -0.76271800 | 3.39365500  | -1.03267600 |
| H | -1.68387500 | 2.30234400  | -2.64992200 |
| H | 0.31301900  | 4.19601300  | 0.65632000  |
| H | -1.18563300 | 4.35251200  | -1.32599500 |
| C | 0.33704600  | -1.68506500 | -0.29093900 |
| O | 1.12096500  | -2.60914600 | -0.51617600 |
| N | -1.02727000 | -1.87455600 | -0.46948800 |
| C | -2.02901900 | -1.09100100 | 0.15839900  |
| C | -3.18363300 | -0.74288500 | -0.54993400 |
| C | -1.87878000 | -0.65221100 | 1.47745600  |
| C | -4.15707200 | 0.05177700  | 0.04338300  |
| H | -3.29745800 | -1.07392700 | -1.58160000 |
| C | -2.84450500 | 0.16285600  | 2.05722000  |
| H | -0.99647100 | -0.94933400 | 2.04212100  |
| C | -3.98646600 | 0.51967500  | 1.34454700  |
| H | -5.04640900 | 0.32247700  | -0.52280000 |
| H | -2.71008200 | 0.50595200  | 3.08136500  |
| H | -4.74350700 | 1.15207500  | 1.80333600  |
| C | -1.39917600 | -3.15280800 | -1.06458700 |
| H | -0.89796600 | -3.28380100 | -2.02780800 |
| H | -1.09434300 | -3.98394900 | -0.41708100 |
| H | -2.48171500 | -3.17973400 | -1.20154200 |
| C | 3.36136600  | -0.10867500 | 0.31104800  |
| F | 3.39959600  | 1.19492600  | -0.04015600 |
| F | 3.55034200  | -0.82717600 | -0.80307600 |
| F | 4.41524500  | -0.32664200 | 1.12693700  |
| H | 2.00778700  | 0.17014300  | 1.90556600  |
| H | 2.19416300  | -1.50497300 | 1.35904700  |

**INT6' S\*\*2 = 2.00**

|   |             |             |             |
|---|-------------|-------------|-------------|
| C | -4.98806400 | 1.13902000  | -0.07481900 |
| C | -3.48443100 | 1.42526100  | -0.14323600 |
| C | -3.82025300 | -0.75706000 | 0.18508100  |
| H | -5.54559400 | 1.47541000  | -0.95449200 |
| H | -3.16739000 | 2.14713300  | 0.62148000  |
| H | -5.47375800 | 1.51661100  | 0.83096900  |
| O | -5.06941300 | -0.31361000 | -0.03014400 |
| N | -2.88591000 | 0.12099700  | 0.18078600  |
| C | -3.00786500 | 1.88881700  | -1.52140000 |
| H | -1.91312400 | 1.79326300  | -1.54404100 |
| H | -3.38029900 | 1.17916500  | -2.27475100 |
| C | -3.45507300 | 3.28477600  | -1.85146700 |
| C | -4.39810400 | 3.51570000  | -2.85641700 |
| C | -2.95494900 | 4.38121100  | -1.13792100 |
| C | -4.82910200 | 4.80762600  | -3.14914200 |
| H | -4.79085700 | 2.67050600  | -3.42392700 |
| C | -3.38331600 | 5.67248700  | -1.42771200 |
| H | -2.22360000 | 4.21952400  | -0.34326600 |
| C | -4.32212100 | 5.88906800  | -2.43493900 |
| H | -5.56120700 | 4.96837000  | -3.93796900 |
| H | -2.98331300 | 6.51439900  | -0.86577100 |
| H | -4.65645300 | 6.89916600  | -2.66179000 |
| C | -3.75112300 | -2.23811100 | 0.44767600  |
| C | -4.33229400 | -3.00917000 | -0.78692000 |
| H | -5.32450500 | -2.59286000 | -0.99684100 |
| H | -4.46869700 | -4.05394300 | -0.48278200 |
| C | -4.59329800 | -2.51549000 | 1.73104900  |
| H | -5.63986900 | -2.29569100 | 1.49139500  |
| H | -4.52235400 | -3.58626200 | 1.95219800  |
| C | -3.40943200 | -2.90348400 | -1.96963500 |
| C | -3.38971000 | -1.74697100 | -2.75501200 |

|    |             |             |             |
|----|-------------|-------------|-------------|
| C  | -2.45061100 | -3.89289800 | -2.21238100 |
| C  | -2.41349300 | -1.56282700 | -3.73019800 |
| H  | -4.15325100 | -0.98336200 | -2.59468100 |
| C  | -1.47346500 | -3.71399800 | -3.18826800 |
| H  | -2.47094000 | -4.80985300 | -1.62112200 |
| C  | -1.44324600 | -2.54039100 | -3.94012000 |
| H  | -2.40802100 | -0.65223900 | -4.32695000 |
| H  | -0.73342000 | -4.49271800 | -3.36650300 |
| H  | -0.67311700 | -2.39446000 | -4.69443600 |
| C  | -4.11600400 | -1.67059600 | 2.88143000  |
| C  | -2.95853500 | -2.01177700 | 3.59089700  |
| C  | -4.75495100 | -0.46540500 | 3.18811400  |
| C  | -2.43946800 | -1.15859400 | 4.56039800  |
| H  | -2.47249500 | -2.96813400 | 3.39471700  |
| C  | -4.23827400 | 0.39074900  | 4.15721700  |
| H  | -5.67331500 | -0.20402300 | 2.66110300  |
| C  | -3.07155800 | 0.05147400  | 4.83793500  |
| H  | -1.54407100 | -1.44479000 | 5.11034100  |
| H  | -4.75361000 | 1.32119400  | 4.38839600  |
| H  | -2.66618800 | 0.71940200  | 5.59492700  |
| C  | -0.91561100 | -4.38341500 | 1.21366400  |
| C  | -0.16275800 | -3.18273500 | 0.63166200  |
| C  | -2.35210700 | -2.75493700 | 0.64511400  |
| H  | -0.72691100 | -4.53993700 | 2.28338800  |
| H  | 0.26320200  | -3.43827500 | -0.34833600 |
| H  | -0.75782000 | -5.32472400 | 0.68142600  |
| O  | -2.31518400 | -4.02947300 | 1.06308200  |
| N  | -1.22543500 | -2.19291400 | 0.38717600  |
| C  | 0.90299800  | -2.58009300 | 1.53070100  |
| H  | 1.17753000  | -1.59368400 | 1.11043900  |
| H  | 0.43931300  | -2.35171400 | 2.50473500  |
| C  | 2.15110800  | -3.39622300 | 1.72888800  |
| C  | 3.04401900  | -3.02407000 | 2.74001400  |
| C  | 2.48033100  | -4.48755100 | 0.91887800  |
| C  | 4.23124800  | -3.71772000 | 2.93476500  |
| H  | 2.80596500  | -2.16368700 | 3.36783200  |
| C  | 3.67304400  | -5.18464100 | 1.10991600  |
| H  | 1.80504700  | -4.81131600 | 0.12557200  |
| C  | 4.55113900  | -4.80214900 | 2.11810900  |
| H  | 4.91327100  | -3.40940600 | 3.72526100  |
| H  | 3.90939900  | -6.03344400 | 0.47136700  |
| H  | 5.47898700  | -5.34903800 | 2.27196900  |
| Cu | -0.86654600 | -0.18427300 | 0.25819900  |
| C  | 0.66506600  | 3.61422800  | 1.24553600  |
| C  | -0.04558100 | 2.57174300  | 0.64647900  |
| C  | -0.13255500 | 1.31639900  | 1.24207000  |
| C  | 0.46160800  | 1.14156400  | 2.49580900  |
| C  | 1.18292800  | 2.17998600  | 3.08569000  |
| C  | 1.30709300  | 3.43653300  | 2.47503200  |
| H  | 0.70903600  | 4.57763700  | 0.73712500  |
| H  | -0.51547000 | 2.74822400  | -0.32044700 |
| H  | 0.39608900  | 0.18589200  | 3.01998500  |
| H  | 1.66362100  | 2.00138700  | 4.04909700  |
| C  | 2.12094600  | 4.53991500  | 3.14922700  |
| C  | 3.58294000  | 4.08612900  | 3.25543500  |
| H  | 4.00906900  | 3.88965800  | 2.26122000  |
| H  | 4.19494700  | 4.86012100  | 3.73557600  |
| H  | 3.68053900  | 3.17042100  | 3.85258700  |
| C  | 1.56989700  | 4.80245700  | 4.55645500  |
| H  | 2.15244500  | 5.58673100  | 5.05562000  |
| H  | 0.52462800  | 5.13215800  | 4.51836000  |
| H  | 1.61442900  | 3.90725700  | 5.18781800  |
| C  | 2.08278700  | 5.84949000  | 2.36272100  |

|   |             |             |             |
|---|-------------|-------------|-------------|
| H | 2.66638600  | 6.61570600  | 2.88584800  |
| H | 2.51530700  | 5.74070900  | 1.35920300  |
| H | 1.06103400  | 6.23344200  | 2.25262500  |
| C | 1.79144600  | -1.82957800 | -1.80816100 |
| H | 0.69551200  | -1.91104700 | -1.82146500 |
| H | 2.19345600  | -2.66372900 | -1.21976500 |
| C | 2.18711200  | -0.50515700 | -1.22331700 |
| C | 3.26772600  | -0.39805600 | -0.28937000 |
| C | 4.27339200  | -1.39465600 | -0.22062700 |
| C | 3.34364400  | 0.68059800  | 0.62659900  |
| C | 5.30811500  | -1.29985300 | 0.69427400  |
| H | 4.25995700  | -2.22524000 | -0.92278700 |
| C | 4.36776400  | 0.75005200  | 1.55562400  |
| H | 2.57127400  | 1.45028700  | 0.61345700  |
| C | 5.36037400  | -0.23195300 | 1.59190800  |
| H | 6.07681300  | -2.06971200 | 0.71444300  |
| H | 4.39278100  | 1.57964600  | 2.25983400  |
| H | 6.16849500  | -0.16630700 | 2.31788800  |
| C | 1.27796400  | 0.59343900  | -1.61115400 |
| O | 0.03327800  | 0.38014700  | -1.60701000 |
| N | 1.77157300  | 1.78247900  | -2.03903300 |
| C | 3.17141500  | 2.08548100  | -2.12433600 |
| C | 4.01629400  | 1.34192000  | -2.94422100 |
| C | 3.66540800  | 3.15339400  | -1.37480700 |
| C | 5.37506300  | 1.64280400  | -2.97350900 |
| H | 3.61174600  | 0.53311900  | -3.54688500 |
| C | 5.02139500  | 3.45554200  | -1.42056800 |
| H | 2.98917000  | 3.71285400  | -0.72747600 |
| C | 5.87967300  | 2.69364000  | -2.21151800 |
| H | 6.03945700  | 1.05616000  | -3.60403300 |
| H | 5.41013900  | 4.27984100  | -0.82578300 |
| H | 6.94194900  | 2.92539700  | -2.24042300 |
| C | 2.23691600  | -2.02149300 | -3.23884700 |
| F | 1.81358300  | -3.20184800 | -3.72691400 |
| F | 3.57885000  | -1.98909400 | -3.36345700 |
| F | 1.74060000  | -1.05012000 | -4.03993400 |
| C | 0.87521800  | 2.81934900  | -2.53923500 |
| H | 1.20186100  | 3.11568600  | -3.54107600 |
| H | -0.14043900 | 2.42530500  | -2.58684000 |
| H | 0.89645600  | 3.70204600  | -1.88917300 |

**TS4'** S\*\*2 = 0.89

|   |             |            |            |
|---|-------------|------------|------------|
| C | 0.90566200  | 3.51723300 | 2.66520500 |
| C | 1.12762200  | 2.21216900 | 1.89041000 |
| C | -0.98225700 | 2.88313000 | 1.62741600 |
| H | 1.48304300  | 4.36054500 | 2.26481900 |
| H | 1.39323400  | 1.38868500 | 2.56756100 |
| H | 1.07214600  | 3.44171000 | 3.74261500 |
| O | -0.49843400 | 3.81966100 | 2.46061100 |
| N | -0.18865400 | 1.92963600 | 1.30540400 |
| C | 2.12765000  | 2.29612000 | 0.73987400 |
| H | 1.99885700  | 1.37058100 | 0.15599400 |
| H | 1.81148700  | 3.11513500 | 0.07487900 |
| C | 3.56695100  | 2.45465400 | 1.13213500 |
| C | 4.31558400  | 3.54018200 | 0.66846800 |
| C | 4.20071300  | 1.49637200 | 1.93316300 |
| C | 5.66660100  | 3.66332500 | 0.98692400 |
| H | 3.82835200  | 4.29189700 | 0.04416700 |
| C | 5.54887500  | 1.61725400 | 2.25459400 |
| H | 3.63168300  | 0.63810700 | 2.29936700 |
| C | 6.28616900  | 2.70094600 | 1.77937000 |
| H | 6.23525200  | 4.51390900 | 0.61654300 |
| H | 6.02698100  | 0.86489700 | 2.87973000 |

|    |             |             |             |              |             |             |             |
|----|-------------|-------------|-------------|--------------|-------------|-------------|-------------|
| H  | 7.34038100  | 2.79578500  | 2.03032900  | C            | 0.16409400  | -4.70404900 | 3.93233400  |
| C  | -2.38492000 | 3.17409000  | 1.17178600  | C            | 0.09566200  | -5.97132400 | 3.07012600  |
| C  | -2.37651300 | 4.64003300  | 0.62707400  | H            | 0.89988400  | -5.98572700 | 2.32338000  |
| H  | -2.29340700 | 5.30884100  | 1.49075200  | H            | 0.19994300  | -6.86706600 | 3.69506900  |
| H  | -3.35169600 | 4.82454900  | 0.16307100  | H            | -0.85735600 | -6.05333600 | 2.53444700  |
| C  | -3.35944000 | 3.05543700  | 2.38760800  | C            | -0.99263700 | -4.71536600 | 4.94133000  |
| H  | -2.94708700 | 3.67269600  | 3.19561200  | H            | -0.93168100 | -5.59757300 | 5.59107800  |
| H  | -4.31202900 | 3.50681800  | 2.08527200  | H            | -0.96897000 | -3.82428900 | 5.58172800  |
| C  | -1.24274000 | 4.89033200  | -0.33304800 | H            | -1.96809300 | -4.74050500 | 4.43938300  |
| C  | -0.13856800 | 5.65237200  | 0.06407300  | C            | 1.48399800  | -4.71539600 | 4.70136900  |
| C  | -1.22949800 | 4.31567100  | -1.60978000 | H            | 1.55119700  | -5.62046700 | 5.31616100  |
| C  | 0.95536600  | 5.82568700  | -0.78075000 | H            | 2.34941400  | -4.71084100 | 4.02526200  |
| H  | -0.14439600 | 6.11742800  | 1.04971400  | H            | 1.57558700  | -3.85505400 | 5.37595100  |
| C  | -0.13669200 | 4.48220600  | -2.45545700 | C            | 0.00684300  | -2.17238400 | -1.84297500 |
| H  | -2.09089100 | 3.74346300  | -1.95625500 | H            | -0.81638300 | -1.44967800 | -1.88923500 |
| C  | 0.96364500  | 5.23115600  | -2.04078200 | H            | -0.29186400 | -2.95640200 | -1.13953300 |
| H  | 1.79683600  | 6.43672400  | -0.45720500 | C            | 1.26176700  | -1.47137600 | -1.39939300 |
| H  | -0.14925700 | 4.03125000  | -3.44642900 | C            | 2.23731900  | -2.13707800 | -0.59079300 |
| H  | 1.81563000  | 5.36572600  | -2.70582300 | C            | 2.18232900  | -3.53682500 | -0.37613000 |
| C  | -3.55729100 | 1.62863900  | 2.81884300  | C            | 3.25433900  | -1.41771200 | 0.08657900  |
| C  | -4.68217100 | 0.91280500  | 2.39693800  | C            | 3.10299800  | -4.17147100 | 0.44103500  |
| C  | -2.58366300 | 0.96316000  | 3.57298100  | H            | 1.42756900  | -4.13438100 | -0.88001000 |
| C  | -4.83008300 | -0.43524200 | 2.71726500  | C            | 4.17372700  | -2.05805000 | 0.89624300  |
| H  | -5.45405200 | 1.42557900  | 1.82066500  | H            | 3.30420200  | -0.33521100 | -0.01514700 |
| C  | -2.72366300 | -0.38491800 | 3.88618200  | C            | 4.10804500  | -3.44123100 | 1.07811800  |
| H  | -1.70563300 | 1.50983800  | 3.92329100  | H            | 3.04628700  | -5.24973500 | 0.57491000  |
| C  | -3.84635800 | -1.08834800 | 3.45556800  | H            | 4.94721800  | -1.47279400 | 1.39186700  |
| H  | -5.72019600 | -0.97409900 | 2.39497500  | H            | 4.83205700  | -3.94628300 | 1.71437100  |
| H  | -1.94871000 | -0.89315500 | 4.45793300  | C            | 1.35259200  | -0.06087700 | -1.85309100 |
| H  | -3.95212600 | -2.14398800 | 3.70040800  | O            | 0.31470800  | 0.65203200  | -1.77709600 |
| C  | -4.48542000 | 1.64200600  | -1.36621100 | N            | 2.51358900  | 0.46950700  | -2.32651600 |
| C  | -3.30221200 | 0.66550900  | -1.41569300 | C            | 3.68204200  | -0.28989100 | -2.65682700 |
| C  | -2.89311300 | 2.25316700  | 0.09316500  | C            | 3.58765700  | -1.41063200 | -3.47938400 |
| H  | -5.41090300 | 1.18174000  | -0.99896100 | C            | 4.92001500  | 0.11138500  | -2.14913400 |
| H  | -2.77846700 | 0.71472500  | -2.38321400 | C            | 4.72748300  | -2.16100000 | -3.75140900 |
| H  | -4.69449900 | 2.15695300  | -2.30725300 | H            | 2.62830500  | -1.68653200 | -3.90670400 |
| O  | -4.08061500 | 2.64530500  | -0.40012500 | C            | 6.05598900  | -0.63414000 | -2.44191300 |
| N  | -2.38423800 | 1.17957500  | -0.38897300 | H            | 4.98868500  | 0.98139400  | -1.49511400 |
| C  | -3.69286900 | -0.78398400 | -1.13061200 | C            | 5.96142200  | -1.77788500 | -3.23288100 |
| H  | -2.77242900 | -1.38730300 | -1.11399000 | H            | 4.64808300  | -3.04111700 | -4.38566000 |
| H  | -4.11644700 | -0.83371400 | -0.11620900 | H            | 7.01775700  | -0.32627100 | -2.03737800 |
| C  | -4.66150400 | -1.31787100 | -2.14658100 | H            | 6.85130300  | -2.36302300 | -3.45321200 |
| C  | -6.01773800 | -1.45335900 | -1.83769500 | C            | 0.09344900  | -2.76713100 | -3.22972300 |
| C  | -4.22919600 | -1.64223500 | -3.43726200 | F            | -1.05301200 | -3.38244300 | -3.55998600 |
| C  | -6.92461400 | -1.90263700 | -2.79461200 | F            | 1.09309300  | -3.66141100 | -3.34947600 |
| H  | -6.36151300 | -1.21600100 | -0.82889200 | F            | 0.31340600  | -1.79876100 | -4.15246900 |
| C  | -5.13215200 | -2.09243200 | -4.39463000 | C            | 2.56539500  | 1.89937900  | -2.62125200 |
| H  | -3.17076900 | -1.55507900 | -3.68939600 | H            | 2.80509200  | 2.04900900  | -3.67922400 |
| C  | -6.48288500 | -2.22136000 | -4.07553400 | H            | 1.59607500  | 2.34079400  | -2.39171600 |
| H  | -7.97643800 | -2.00875200 | -2.53686100 | H            | 3.33929000  | 2.38374700  | -2.01244400 |
| H  | -4.78040000 | -2.34922200 | -5.39183600 |              |             |             |             |
| H  | -7.18848400 | -2.57618400 | -4.82369000 |              |             |             |             |
| Cu | -0.58266700 | 0.27628700  | 0.15016600  | <b>INT7'</b> |             |             |             |
| C  | 0.97288800  | -2.44405300 | 3.00876900  | Cu           | 0.02262100  | -0.19569100 | 0.04497100  |
| C  | 0.80160500  | -1.33228400 | 2.18115600  | C            | -0.70849600 | 3.39601500  | 2.10808400  |
| C  | -0.30565400 | -1.21614500 | 1.34730500  | C            | -0.85548700 | 2.12400400  | 1.55069100  |
| C  | -1.27210300 | -2.22462000 | 1.39285300  | C            | 0.20104900  | 1.52777300  | 0.87999900  |
| C  | -1.09437900 | -3.33817000 | 2.21205700  | C            | 1.42196800  | 2.18658700  | 0.79678700  |
| C  | 0.02876200  | -3.47406100 | 3.03802200  | C            | 1.55019200  | 3.46717500  | 1.33461300  |
| H  | 1.86685700  | -2.50076400 | 3.62749000  | C            | 0.49054600  | 4.10433000  | 1.99033000  |
| H  | 1.59254500  | -0.57871200 | 2.16596900  | H            | -1.56332700 | 3.84024200  | 2.61449400  |
| H  | -2.18612900 | -2.15716400 | 0.80041300  | H            | -1.83542100 | 1.64671200  | 1.60041300  |
| H  | -1.86467000 | -4.11118600 | 2.21553900  | H            | 2.28457700  | 1.71625100  | 0.32974700  |
|    |             |             |             | H            | 2.51277400  | 3.97265100  | 1.24105800  |

|   |             |             |             |             |             |             |             |
|---|-------------|-------------|-------------|-------------|-------------|-------------|-------------|
| C | 0.67032300  | 5.52546800  | 2.52006400  | H           | 3.76287000  | -0.05756500 | -3.85227100 |
| C | 1.00047200  | 6.45288500  | 1.34277800  | C           | 7.16110200  | 0.03457400  | -3.81682600 |
| H | 0.19487200  | 6.44365900  | 0.59755000  | H           | 8.37380500  | 0.29822900  | -2.05494000 |
| H | 1.12912500  | 7.48602200  | 1.68922400  | H           | 5.69903500  | -0.20124800 | -5.38278400 |
| H | 1.92658100  | 6.15533200  | 0.83627400  | H           | 8.01171500  | -0.02324400 | -4.49256800 |
| C | 1.82650200  | 5.55830500  | 3.52780600  | C           | 1.79493300  | -2.66693000 | 2.10329600  |
| H | 1.97141900  | 6.57481800  | 3.91429300  | C           | 2.75061400  | -2.33081500 | 3.29202900  |
| H | 1.62965100  | 4.89975200  | 4.38371000  | H           | 3.67790100  | -2.89070000 | 3.12374100  |
| H | 2.77316500  | 5.24405500  | 3.07081900  | H           | 2.28879600  | -2.73083000 | 4.20277700  |
| C | -0.58994800 | 6.04745300  | 3.20740100  | C           | 1.65193000  | -4.21796400 | 1.97808400  |
| H | -0.42270300 | 7.06848800  | 3.56923400  | H           | 2.65938100  | -4.62569800 | 1.84776100  |
| H | -1.44566100 | 6.07907400  | 2.52063300  | H           | 1.27109000  | -4.58649400 | 2.93714000  |
| H | -0.87070700 | 5.43454000  | 4.07322400  | C           | 3.03476100  | -0.86113000 | 3.42403100  |
| C | 0.44779700  | 0.96993700  | -2.36754300 | C           | 4.17947300  | -0.30465700 | 2.84464600  |
| H | 1.12439600  | 0.12672000  | -2.19170600 | C           | 2.14120400  | -0.01352900 | 4.08829800  |
| H | 0.93504000  | 1.86124100  | -1.95643700 | C           | 4.43281300  | 1.06179100  | 2.93785200  |
| C | -0.87077100 | 0.71264300  | -1.65287500 | H           | 4.88979300  | -0.95781900 | 2.33329900  |
| C | -1.78136900 | 1.83251900  | -1.38860100 | C           | 2.38747800  | 1.35260100  | 4.17777800  |
| C | -1.43357000 | 3.16018200  | -1.69316700 | H           | 1.25241000  | -0.43632400 | 4.56064400  |
| C | -3.00274600 | 1.61990600  | -0.72049900 | C           | 3.53677000  | 1.89253700  | 3.60558000  |
| C | -2.28273300 | 4.21305100  | -1.37722200 | H           | 5.33968100  | 1.47610400  | 2.49914800  |
| H | -0.49663100 | 3.38139100  | -2.19581900 | H           | 1.68118500  | 1.99794000  | 4.69758800  |
| C | -3.85754700 | 2.66792700  | -0.41779800 | H           | 3.73436300  | 2.96005100  | 3.68511000  |
| H | -3.28916100 | 0.60889700  | -0.43278900 | C           | 0.75451300  | -4.64403500 | 0.84764500  |
| C | -3.50199500 | 3.97522800  | -0.74665800 | C           | -0.62435600 | -4.78360900 | 1.04226400  |
| H | -1.98993600 | 5.22929000  | -1.63327100 | C           | 1.27563000  | -4.89782600 | -0.42565600 |
| H | -4.80438700 | 2.45998000  | 0.07912700  | C           | -1.45827800 | -5.16933700 | -0.00317500 |
| H | -4.16765300 | 4.80225700  | -0.50919500 | H           | -1.04079600 | -4.62255900 | 2.03830500  |
| C | -1.35550300 | -0.69720700 | -1.83781900 | C           | 0.44507700  | -5.28538200 | -1.47344000 |
| O | -0.54788700 | -1.55983800 | -1.36270200 | H           | 2.35091200  | -4.82002300 | -0.58406900 |
| N | -2.53893100 | -1.10278500 | -2.34846100 | C           | -0.92474600 | -5.42372700 | -1.26462200 |
| C | -3.54842200 | -0.26832400 | -2.92916600 | H           | -2.52646600 | -5.29557600 | 0.17399000  |
| C | -3.24656100 | 0.63185400  | -3.94608600 | H           | 0.87192200  | -5.49931000 | -2.45139300 |
| C | -4.85706800 | -0.38634700 | -2.45408800 | H           | -1.57236400 | -5.74838600 | -2.07750600 |
| C | -4.24913300 | 1.45375900  | -4.45246700 | C           | -1.44131800 | -2.07745600 | 3.64482300  |
| H | -2.24161300 | 0.67922100  | -4.34798700 | C           | -1.58892500 | -1.17759800 | 2.41281900  |
| C | -5.85517500 | 0.42523500  | -2.97942800 | C           | 0.43338400  | -2.12101700 | 2.40380600  |
| H | -5.08345200 | -1.09019200 | -1.65327600 | H           | -2.16207000 | -2.90299000 | 3.67521100  |
| C | -5.55167900 | 1.35606600  | -3.97155600 | H           | -1.75494100 | -0.13172700 | 2.70481600  |
| H | -4.00759500 | 2.16271500  | -5.24125100 | H           | -1.47016800 | -1.54340400 | 4.59868900  |
| H | -6.87227400 | 0.33562000  | -2.60416400 | O           | -0.11765000 | -2.65348700 | 3.50924400  |
| H | -6.33264700 | 1.99532700  | -4.37672200 | N           | -0.27713900 | -1.27418200 | 1.75762500  |
| C | 0.40591900  | 1.10177400  | -3.87309500 | C           | -2.66583500 | -1.61557400 | 1.41968600  |
| F | 1.64850400  | 1.30665500  | -4.34627600 | H           | -2.51213000 | -1.02267900 | 0.50381100  |
| F | -0.36495100 | 2.11346100  | -4.31052500 | H           | -2.46728400 | -2.65932600 | 1.13427300  |
| F | -0.06221400 | -0.03420800 | -4.44282300 | C           | -4.07090800 | -1.44562100 | 1.91632600  |
| C | 4.10892200  | -2.24225200 | -0.63748100 | C           | -4.89197800 | -2.55293200 | 2.14190600  |
| C | 3.11305000  | -1.13618500 | -1.01588500 | C           | -4.58514700 | -0.16632700 | 2.16042100  |
| C | 2.42613800  | -2.14006100 | 0.83975200  | C           | -6.19786500 | -2.38963600 | 2.59956700  |
| H | 5.10754400  | -1.86027900 | -0.39495300 | H           | -4.50162800 | -3.55445400 | 1.95010500  |
| H | 2.60616800  | -1.37976800 | -1.96356900 | C           | -5.88848200 | 0.00080400  | 2.61583500  |
| H | 4.20854500  | -3.03681400 | -1.38277100 | H           | -3.95455100 | 0.70888000  | 1.98413900  |
| O | 3.55521900  | -2.82274300 | 0.55939200  | C           | -6.69816400 | -1.11257100 | 2.83682400  |
| N | 2.09340400  | -1.18101800 | 0.05599400  | H           | -6.82531400 | -3.26209100 | 2.76977500  |
| C | 3.79308700  | 0.23130700  | -1.13769700 | H           | -6.27502800 | 1.00170600  | 2.79957900  |
| H | 3.05649200  | 0.97404600  | -1.47250100 | H           | -7.71768000 | -0.98329900 | 3.19347500  |
| H | 4.12023200  | 0.53924000  | -0.13343400 | C           | -2.85475300 | -2.53139400 | -2.23828300 |
| C | 4.96611100  | 0.19247600  | -2.07866500 | H           | -3.51667200 | -2.80074300 | -3.06315600 |
| C | 6.27206800  | 0.28994900  | -1.59035300 | H           | -1.93281500 | -3.11196600 | -2.28178300 |
| C | 4.77501200  | 0.00992600  | -3.45269500 | H           | -3.35514800 | -2.75146200 | -1.28547500 |
| C | 7.36396800  | 0.21431300  | -2.45151300 |             |             |             |             |
| H | 6.43087700  | 0.43675400  | -0.52001300 |             |             |             |             |
| C | 5.86366000  | -0.06656700 | -4.31554000 |             |             |             |             |
|   |             |             |             | <b>TS5'</b> |             |             |             |
|   |             |             |             | Cu          | -0.48420800 | 0.25000600  | 0.00719100  |

|   |             |             |             |   |             |             |             |
|---|-------------|-------------|-------------|---|-------------|-------------|-------------|
| C | 0.48541900  | -2.27436500 | 3.06309000  | N | -2.29160800 | 1.21351200  | -0.39823200 |
| C | 0.70183600  | -1.44338500 | 1.96898900  | C | -3.75319300 | -0.61357400 | -1.22748000 |
| C | -0.15448600 | -1.46578300 | 0.86722400  | H | -2.89531300 | -1.29910300 | -1.24014200 |
| C | -1.21355400 | -2.37828700 | 0.87182700  | H | -4.17948500 | -0.66382800 | -0.21450500 |
| C | -1.41431200 | -3.21973000 | 1.96249100  | C | -4.76214900 | -1.01735900 | -2.26442800 |
| C | -0.56409600 | -3.20305100 | 3.07466700  | C | -6.13084900 | -0.98835800 | -1.98232600 |
| H | 1.17219200  | -2.21368900 | 3.90501200  | C | -4.34859500 | -1.38547900 | -3.54944800 |
| H | 1.58102500  | -0.79929000 | 1.96787600  | C | -7.06702400 | -1.31640400 | -2.95994400 |
| H | -1.91015300 | -2.44081400 | 0.03823600  | H | -6.46333900 | -0.71887800 | -0.97790800 |
| H | -2.25126200 | -3.91779900 | 1.93010000  | C | -5.28088900 | -1.71539300 | -4.52767800 |
| C | -0.76209200 | -4.21321400 | 4.20096000  | H | -3.28231800 | -1.43001500 | -3.77973000 |
| C | -0.49407900 | -5.61682800 | 3.63799600  | C | -6.64316700 | -1.67853700 | -4.23541700 |
| H | 0.52374300  | -5.69279300 | 3.23449600  | H | -8.12875400 | -1.29488700 | -2.72248300 |
| H | -0.60619700 | -6.37466900 | 4.42336800  | H | -4.94372900 | -2.00767000 | -5.52017600 |
| H | -1.19253100 | -5.86782800 | 2.83033000  | H | -7.37239200 | -1.93893100 | -4.99956300 |
| C | -2.20284400 | -4.14696100 | 4.72461500  | C | -2.14641600 | 3.21753000  | 1.15174100  |
| H | -2.35096900 | -4.88785100 | 5.51965400  | C | -3.15786200 | 3.15852300  | 2.34225100  |
| H | -2.43442700 | -3.15977500 | 5.14553200  | H | -4.05380500 | 3.71222400  | 2.03695700  |
| H | -2.93896600 | -4.36119500 | 3.94061800  | H | -2.70658300 | 3.70258300  | 3.18140400  |
| C | 0.18694800  | -3.96388700 | 5.37195900  | C | -2.02184300 | 4.68644900  | 0.63126400  |
| H | -0.00765900 | -4.68910100 | 6.17016700  | H | -2.96586800 | 4.94400900  | 0.13895700  |
| H | 1.23877600  | -4.07550200 | 5.08155200  | H | -1.92293900 | 5.33575500  | 1.50814700  |
| H | 0.05465000  | -2.96135600 | 5.79957100  | C | -3.50637900 | 1.74329900  | 2.70763700  |
| C | -0.11654800 | -2.15208100 | -1.92956800 | C | -4.71041200 | 1.17921900  | 2.27537500  |
| H | -0.94686100 | -1.44112400 | -2.00673400 | C | -2.59084800 | 0.93079400  | 3.38619100  |
| H | -0.50132000 | -3.04986400 | -1.44117000 | C | -4.99087200 | -0.16584200 | 2.50596100  |
| C | 0.99575400  | -1.51004000 | -1.11139900 | H | -5.43566700 | 1.80776800  | 1.75633100  |
| C | 2.03537800  | -2.36658000 | -0.52077700 | C | -2.86193200 | -0.41528800 | 3.60583400  |
| C | 1.94883100  | -3.76862400 | -0.53971600 | H | -1.65388400 | 1.35731300  | 3.74943700  |
| C | 3.09923500  | -1.78951000 | 0.19685600  | C | -4.05998000 | -0.96954800 | 3.15953400  |
| C | 2.90265800  | -4.55179500 | 0.09929200  | H | -5.94027000 | -0.58608100 | 2.17684700  |
| H | 1.14092500  | -4.26300700 | -1.07142200 | H | -2.12949000 | -1.03704500 | 4.11957200  |
| C | 4.05499700  | -2.56739200 | 0.82752700  | H | -4.27169400 | -2.02315700 | 3.33449000  |
| H | 3.17280800  | -0.70385800 | 0.25989200  | C | -0.84268200 | 4.87449000  | -0.28651200 |
| C | 3.96246200  | -3.95849100 | 0.78096700  | C | 0.29059100  | 5.56586600  | 0.15531900  |
| H | 2.81872800  | -5.63566300 | 0.05799200  | C | -0.81960400 | 4.30624900  | -1.56572400 |
| H | 4.87795900  | -2.08470800 | 1.35300300  | C | 1.42020600  | 5.68141700  | -0.65150300 |
| H | 4.71024000  | -4.57519100 | 1.27493400  | H | 0.27928400  | 6.02062800  | 1.14585500  |
| C | 1.32985400  | -0.16091200 | -1.74729200 | C | 0.30917800  | 4.41298200  | -2.37235200 |
| O | 0.37528200  | 0.63796800  | -1.91806100 | H | -1.69971300 | 3.78539500  | -1.94495900 |
| N | 2.56255200  | 0.22392900  | -2.17966500 | C | 1.43560800  | 5.09600800  | -1.91605100 |
| C | 3.77320100  | -0.54129600 | -2.29635600 | H | 2.28573800  | 6.23763900  | -0.29411400 |
| C | 3.82475500  | -1.72055900 | -3.03257700 | H | 0.30581000  | 3.96273500  | -3.36347900 |
| C | 4.92222900  | -0.04582600 | -1.67313200 | H | 2.31579200  | 5.18508400  | -2.55147700 |
| C | 5.01933900  | -2.43370600 | -3.09834600 | C | 1.11328100  | 3.32074900  | 2.73348800  |
| H | 2.94231300  | -2.07922600 | -3.55091200 | C | 1.27844500  | 2.03250500  | 1.91786500  |
| C | 6.11238600  | -0.75649200 | -1.75594900 | C | -0.77852800 | 2.82464200  | 1.63299800  |
| H | 4.86803500  | 0.87659600  | -1.09317900 | H | 1.74611900  | 4.14270900  | 2.37409300  |
| C | 6.16150900  | -1.95917000 | -2.46014400 | H | 1.48426000  | 1.17346200  | 2.57247100  |
| H | 5.05464500  | -3.36158200 | -3.66507900 | H | 1.25395500  | 3.19963400  | 3.81062700  |
| H | 7.00075000  | -0.37324000 | -1.25737100 | O | -0.26566800 | 3.70591800  | 2.51233600  |
| H | 7.09197500  | -2.51931400 | -2.51969800 | N | -0.03685200 | 1.83806300  | 1.29142400  |
| C | 0.20705300  | -2.53346800 | -3.35760600 | C | 2.30294200  | 2.10042000  | 0.79055600  |
| F | -0.91169900 | -2.95006200 | -3.97648800 | H | 2.12562000  | 1.20902500  | 0.16760800  |
| F | 1.11118500  | -3.52880700 | -3.44773500 | H | 2.04553300  | 2.96264500  | 0.15564800  |
| F | 0.69506100  | -1.49043900 | -4.06683700 | C | 3.74971000  | 2.14858100  | 1.18351000  |
| C | -4.32003400 | 1.87311100  | -1.42095100 | C | 4.58701200  | 3.13714600  | 0.65809100  |
| C | -3.22469100 | 0.80040100  | -1.46005200 | C | 4.30994500  | 1.16510300  | 2.00804200  |
| C | -2.69796300 | 2.34253800  | 0.05552200  | C | 5.95193400  | 3.13954300  | 0.93788400  |
| H | -5.27667000 | 1.49552400  | -1.03835600 | H | 4.15833800  | 3.90335100  | 0.00910800  |
| H | -2.67000100 | 0.82549300  | -2.41168000 | C | 5.67264700  | 1.16417900  | 2.28967600  |
| H | -4.49506500 | 2.38660400  | -2.36950400 | H | 3.67391400  | 0.38041000  | 2.42504600  |
| O | -3.82605100 | 2.85119800  | -0.47514400 | C | 6.49803400  | 2.15082300  | 1.75215400  |

|   |            |            |             |
|---|------------|------------|-------------|
| H | 6.58967900 | 3.91534200 | 0.51889400  |
| H | 6.09294900 | 0.39179300 | 2.93148900  |
| H | 7.56343800 | 2.15054800 | 1.97219400  |
| C | 2.60906900 | 1.57451500 | -2.75495600 |
| H | 2.05532600 | 1.60005300 | -3.70066000 |
| H | 2.14673400 | 2.29427900 | -2.07377900 |
| H | 3.65289900 | 1.83462100 | -2.93615800 |

|   |             |             |             |
|---|-------------|-------------|-------------|
| F | -2.30868800 | -2.85914200 | 0.46301400  |
| F | -2.53440600 | -2.34692500 | -1.62445100 |
| C | -1.95791400 | -0.34264400 | 3.35932400  |
| H | -2.33229500 | -1.36467100 | 3.49017400  |
| H | -1.01992400 | -0.25997500 | 3.91499500  |
| H | -2.68968200 | 0.36802500  | 3.74658100  |

**4b**

|   |             |             |             |
|---|-------------|-------------|-------------|
| C | 3.42889900  | -0.18099600 | -1.12209900 |
| C | 2.06902500  | -0.47303600 | -1.13458500 |
| C | 1.29822400  | -0.42570000 | 0.02927700  |
| C | 1.94041500  | -0.03691500 | 1.20770300  |
| C | 3.29667800  | 0.26806500  | 1.21198200  |
| C | 4.07970900  | 0.19656600  | 0.05506900  |
| H | 3.98031300  | -0.24185000 | -2.05793700 |
| H | 1.59605100  | -0.71668800 | -2.08639200 |
| H | 1.39149800  | 0.01275000  | 2.14424500  |
| H | 3.75656700  | 0.56492000  | 2.15511400  |
| C | 5.56810600  | 0.52896500  | 0.11896800  |
| C | 5.74711300  | 1.97027200  | 0.61369100  |
| H | 5.26719600  | 2.68544600  | -0.06577500 |
| H | 6.81313200  | 2.22579600  | 0.67668600  |
| H | 5.31231000  | 2.11496800  | 1.60995300  |
| C | 6.25978600  | -0.42770300 | 1.09916000  |
| H | 7.33177600  | -0.19983600 | 1.16736600  |
| H | 6.15530600  | -1.47067700 | 0.77584500  |
| H | 5.83884400  | -0.34977500 | 2.10868400  |
| C | 6.24709200  | 0.39842200  | -1.24333600 |
| H | 7.31280800  | 0.64214000  | -1.15458200 |
| H | 5.81343400  | 1.08196500  | -1.98412100 |
| H | 6.17450100  | -0.62193000 | -1.64031700 |
| C | -0.32868500 | -2.14620400 | -0.67652500 |
| H | 0.07958300  | -2.17582500 | -1.69164700 |
| H | 0.31066000  | -2.78090700 | -0.05613400 |
| C | -0.22267500 | -0.71578000 | -0.08191200 |
| C | -0.74837900 | 0.40909300  | -0.97203400 |
| C | -1.21937900 | 0.20823800  | -2.27044800 |
| C | -0.62516600 | 1.72924700  | -0.51698200 |
| C | -1.60685300 | 1.28591700  | -3.06705300 |
| H | -1.30489000 | -0.79393300 | -2.67748500 |
| C | -1.02356200 | 2.80226200  | -1.29940600 |
| H | -0.21818200 | 1.90921200  | 0.47894600  |
| C | -1.52350100 | 2.58507600  | -2.58328600 |
| H | -1.97672200 | 1.09888000  | -4.07391900 |
| H | -0.93956500 | 3.81460000  | -0.90719800 |
| H | -1.83243300 | 3.42522500  | -3.20257700 |
| C | -0.76838800 | -0.85994700 | 1.37071500  |
| O | -0.22634800 | -1.71208400 | 2.06821000  |
| N | -1.73672900 | -0.05900300 | 1.93748800  |
| C | -2.72569100 | 0.75267600  | 1.30505600  |
| C | -2.93728300 | 2.04695000  | 1.79050800  |
| C | -3.51526900 | 0.27047500  | 0.26262400  |
| C | -3.90746800 | 2.85935100  | 1.21782000  |
| H | -2.31543400 | 2.41739500  | 2.60483600  |
| C | -4.46756900 | 1.09829400  | -0.32443400 |
| H | -3.37807300 | -0.74574700 | -0.09298200 |
| C | -4.66962300 | 2.39143400  | 0.14886300  |
| H | -4.05864400 | 3.86769700  | 1.59913200  |
| H | -5.06279000 | 0.71916900  | -1.15316700 |
| H | -5.42180300 | 3.03080400  | -0.30886100 |
| C | -1.66061300 | -2.85756700 | -0.72171200 |
| F | -1.46555700 | -4.14463900 | -1.07070300 |

**TS2'' S\*\*2 = 0.75**

|   |             |             |             |
|---|-------------|-------------|-------------|
| C | 1.39906600  | -0.77380500 | 2.07461800  |
| H | 1.01950200  | -1.61738600 | 2.64628000  |
| H | 2.47669000  | -0.62130400 | 2.05618000  |
| C | 0.54837900  | 0.06065500  | 1.45073900  |
| C | 1.00734800  | 1.22167600  | 0.66890100  |
| C | 2.23242900  | 1.19694800  | -0.01434900 |
| C | 0.23356200  | 2.39010600  | 0.60472200  |
| C | 2.67397200  | 2.30494300  | -0.72707300 |
| H | 2.82994600  | 0.28536400  | -0.00151700 |
| C | 0.67723100  | 3.49995600  | -0.10464300 |
| H | -0.72177200 | 2.42879400  | 1.12751400  |
| C | 1.89834400  | 3.46172400  | -0.77400700 |
| H | 3.62361000  | 2.26204500  | -1.25742900 |
| H | 0.06542600  | 4.39960200  | -0.13522100 |
| H | 2.24188000  | 4.32820700  | -1.33586500 |
| C | -0.91960800 | -0.24407900 | 1.60065300  |
| O | -1.35235400 | -0.64464500 | 2.67457000  |
| C | 1.67623900  | -2.27130800 | -0.52611000 |
| F | 0.52857000  | -2.90465000 | -0.34052000 |
| F | 2.70444600  | -3.09287200 | -0.36440200 |
| F | 1.71190900  | -1.70904600 | -1.73101400 |
| C | -1.82762600 | -0.10826500 | 0.42732700  |
| C | -1.36635600 | -0.06334400 | -0.89517000 |
| C | -3.20807600 | -0.10577600 | 0.66867400  |
| C | -2.26946200 | -0.01051300 | -1.95110000 |
| H | -0.29876700 | -0.08192400 | -1.10408900 |
| C | -4.10800000 | -0.03309600 | -0.38510700 |
| H | -3.54645900 | -0.16667500 | 1.70095300  |
| C | -3.63924600 | 0.01421500  | -1.69821800 |
| H | -1.90241100 | 0.01286700  | -2.97530600 |
| H | -5.17827600 | -0.01953800 | -0.18728700 |
| H | -4.34404800 | 0.06598300  | -2.52649300 |

**1c**

|   |             |             |             |
|---|-------------|-------------|-------------|
| C | 1.17002300  | 2.74538100  | -0.71888800 |
| H | 0.50622100  | 3.59703000  | -0.84302400 |
| H | 2.21005200  | 2.86869000  | -1.01460600 |
| C | 0.71050100  | 1.59811500  | -0.19396300 |
| C | 1.57278600  | 0.42149200  | 0.02490500  |
| C | 1.36234700  | -0.41785300 | 1.12888500  |
| C | 2.63517000  | 0.12548500  | -0.84123100 |
| C | 2.19339800  | -1.50657800 | 1.36579100  |
| H | 0.54246400  | -0.20542400 | 1.81457600  |
| C | 3.46431500  | -0.96513700 | -0.60655500 |
| H | 2.79304000  | 0.74968700  | -1.72034700 |
| C | 3.24731900  | -1.78541000 | 0.49881200  |
| H | 2.01667000  | -2.14054900 | 2.23272400  |
| H | 4.27883500  | -1.18164500 | -1.29569300 |
| H | 3.89388300  | -2.64191400 | 0.68016200  |
| C | -0.73951700 | 1.57667900  | 0.21603800  |
| O | -1.25396800 | 2.57468200  | 0.70584900  |
| C | -1.55684700 | 0.35295000  | -0.02151500 |
| C | -1.19228900 | -0.64169900 | -0.93826500 |
| C | -2.77928500 | 0.24246400  | 0.65427500  |
| C | -2.03234600 | -1.72562200 | -1.16839200 |



|   |             |             |             |
|---|-------------|-------------|-------------|
| H | -0.25447600 | -0.56223500 | -1.48473200 |
| C | -3.60718400 | -0.85056300 | 0.43992300  |
| H | -3.05597500 | 1.03741600  | 1.34376200  |
| C | -3.23468900 | -1.83698900 | -0.47341700 |
| H | -1.74666200 | -2.48792400 | -1.89067600 |
| H | -4.54896000 | -0.93441700 | 0.97923400  |
| H | -3.88556300 | -2.69245900 | -0.64659000 |

**INT6'' S\*\*2 = 2.00**

|   |             |             |             |
|---|-------------|-------------|-------------|
| C | -4.69591400 | -1.32276000 | 0.21963400  |
| C | -3.53449700 | -0.33246700 | 0.07726000  |
| C | -2.73319600 | -2.39605200 | 0.37748400  |
| H | -5.38964600 | -1.31895800 | -0.62701400 |
| H | -3.56411400 | 0.44794300  | 0.84971700  |
| H | -5.25946400 | -1.21889500 | 1.15246400  |
| O | -4.04977500 | -2.62691100 | 0.25395800  |
| N | -2.35221100 | -1.17295300 | 0.32351600  |
| C | -3.44264700 | 0.31763100  | -1.30492500 |
| H | -2.45129900 | 0.78399100  | -1.39102900 |
| H | -3.46345800 | -0.47558900 | -2.06705000 |
| C | -4.54350700 | 1.31074500  | -1.54859000 |
| C | -5.56884200 | 1.03949900  | -2.45835700 |
| C | -4.57597200 | 2.52004600  | -0.84307600 |
| C | -6.60007800 | 1.95296800  | -2.66557500 |
| H | -5.55038500 | 0.10452700  | -3.02068300 |
| C | -5.60403100 | 3.43436300  | -1.04810000 |
| H | -3.78538400 | 2.74493200  | -0.12405500 |
| C | -6.61950400 | 3.15274300  | -1.96047700 |
| H | -7.38768100 | 1.72691600  | -3.38158300 |
| H | -5.61357000 | 4.37125100  | -0.49419200 |
| H | -7.42306600 | 3.86831700  | -2.12120400 |
| C | -1.92963000 | -3.64722900 | 0.61687900  |
| C | -2.12154600 | -4.62485500 | -0.59312300 |
| H | -3.20022400 | -4.75347500 | -0.74142200 |
| H | -1.70993100 | -5.59661500 | -0.29464600 |
| C | -2.45795200 | -4.28066500 | 1.94042500  |
| H | -3.48203600 | -4.62367500 | 1.75458700  |
| H | -1.84747300 | -5.16454300 | 2.15580800  |
| C | -1.43782700 | -4.09964100 | -1.82499400 |
| C | -2.02634800 | -3.08274100 | -2.58324800 |
| C | -0.13956000 | -4.50877500 | -2.14785300 |
| C | -1.32630500 | -2.46516100 | -3.61574000 |
| H | -3.04959100 | -2.77606300 | -2.35809300 |
| C | 0.56368700  | -3.89606500 | -3.18223800 |
| H | 0.32257200  | -5.31512800 | -1.57573600 |
| C | -0.02393200 | -2.86311400 | -3.91109300 |
| H | -1.79751700 | -1.67085800 | -4.19210000 |
| H | 1.57268900  | -4.22613700 | -3.42503300 |
| H | 0.52753900  | -2.38012800 | -4.71451300 |
| C | -2.42409300 | -3.28331800 | 3.06750000  |
| C | -1.22270800 | -2.96427700 | 3.71122100  |
| C | -3.57614800 | -2.57168300 | 3.41575300  |
| C | -1.17048500 | -1.94575400 | 4.65841200  |
| H | -0.32400800 | -3.53866800 | 3.48390300  |
| C | -3.52704300 | -1.55070300 | 4.36141200  |
| H | -4.52261100 | -2.83096000 | 2.94022700  |
| C | -2.32064900 | -1.22725200 | 4.97747800  |
| H | -0.22973100 | -1.71871300 | 5.15786600  |
| H | -4.43575900 | -1.01294100 | 4.62565500  |
| H | -2.28034000 | -0.43042000 | 5.71697900  |
| C | 1.63059800  | -4.09510400 | 1.21924400  |
| C | 1.66517500  | -2.71048100 | 0.56449600  |
| C | -0.44889000 | -3.40644700 | 0.72858900  |

|    |             |             |             |
|----|-------------|-------------|-------------|
| H  | 1.92557600  | -4.08572500 | 2.27625300  |
| H  | 2.10645900  | -2.77556300 | -0.43971800 |
| H  | 2.20322500  | -4.86419800 | 0.69518100  |
| O  | 0.23191400  | -4.47912300 | 1.15893700  |
| N  | 0.24148100  | -2.37870600 | 0.38226000  |
| C  | 2.34048000  | -1.61772500 | 1.37484600  |
| H  | 2.06286600  | -0.64594000 | 0.92267400  |
| H  | 1.87782600  | -1.60193100 | 2.37556800  |
| C  | 3.83707900  | -1.69257400 | 1.49997600  |
| C  | 4.46999700  | -0.87470200 | 2.44310100  |
| C  | 4.62948200  | -2.50801100 | 0.68632200  |
| C  | 5.85279000  | -0.86935200 | 2.56976400  |
| H  | 3.86177000  | -0.22267600 | 3.07283000  |
| C  | 6.01902600  | -2.50181000 | 0.80805600  |
| H  | 4.16968500  | -3.16392700 | -0.05443400 |
| C  | 6.63392300  | -1.68364500 | 1.74970100  |
| H  | 6.32536800  | -0.22537400 | 3.30932000  |
| H  | 6.61873700  | -3.14594100 | 0.16820100  |
| H  | 7.71722300  | -1.68386900 | 1.84984200  |
| Cu | -0.44230700 | -0.46191900 | 0.20917700  |
| C  | -0.88953500 | 3.60076600  | 1.33938000  |
| C  | -1.00679300 | 2.38262100  | 0.66426300  |
| C  | -0.45809800 | 1.21486800  | 1.18607600  |
| C  | 0.18156400  | 1.28072400  | 2.42715700  |
| C  | 0.30795500  | 2.50030300  | 3.09097500  |
| C  | -0.22992800 | 3.68537100  | 2.56923600  |
| H  | -1.32648300 | 4.48990600  | 0.88672700  |
| H  | -1.51601000 | 2.36977400  | -0.29928200 |
| H  | 0.60049300  | 0.38552500  | 2.89132900  |
| H  | 0.83156300  | 2.52260500  | 4.04814600  |
| C  | -0.09287900 | 4.99133400  | 3.35114800  |
| C  | 1.39276700  | 5.35372800  | 3.47563600  |
| H  | 1.83381200  | 5.54630800  | 2.48860100  |
| H  | 1.51934900  | 6.26209400  | 4.07805100  |
| H  | 1.97005600  | 4.55321700  | 3.95558900  |
| C  | -0.68581200 | 4.81017900  | 4.75480300  |
| H  | -0.60024600 | 5.74141400  | 5.32846900  |
| H  | -1.74805400 | 4.54159800  | 4.70526700  |
| H  | -0.16948400 | 4.02640700  | 5.32155000  |
| C  | -0.81569800 | 6.15158200  | 2.66882600  |
| H  | -0.70139900 | 7.06424700  | 3.26508300  |
| H  | -0.40918500 | 6.36045800  | 1.67135900  |
| H  | -1.89094500 | 5.95964400  | 2.56514700  |
| C  | 2.49559100  | -0.65960900 | -1.99196900 |
| H  | 1.58801200  | -1.27931400 | -1.95755700 |
| H  | 3.28419700  | -1.16323800 | -1.41915900 |
| C  | 2.20230900  | 0.71147100  | -1.46303300 |
| C  | 3.13971000  | 1.42752400  | -0.65346800 |
| C  | 4.50211200  | 1.04028700  | -0.57772500 |
| C  | 2.71284000  | 2.51305300  | 0.15698900  |
| C  | 5.38768600  | 1.71678800  | 0.24384800  |
| H  | 4.87050500  | 0.22580400  | -1.19698300 |
| C  | 3.60288000  | 3.16347600  | 0.99312400  |
| H  | 1.66432500  | 2.81230000  | 0.14640400  |
| C  | 4.94519600  | 2.77603000  | 1.03861700  |
| H  | 6.43141400  | 1.41113700  | 0.27130800  |
| H  | 3.24780400  | 3.97717000  | 1.62257400  |
| H  | 5.64183500  | 3.29629700  | 1.69295100  |
| C  | 0.87972000  | 1.22665100  | -1.84567700 |
| O  | -0.12310600 | 0.48225600  | -1.68696700 |
| C  | 2.92622100  | -0.62158500 | -3.44346700 |
| F  | 3.17244000  | -1.85951500 | -3.90980600 |
| F  | 4.04315200  | 0.11146400  | -3.61350800 |

|                          |             |             |             |    |             |             |             |
|--------------------------|-------------|-------------|-------------|----|-------------|-------------|-------------|
| F                        | 1.96773900  | -0.07431600 | -4.21940900 | H  | -2.19227800 | -2.16271900 | 4.42935600  |
| C                        | 0.72873400  | 2.53368800  | -2.49378300 | H  | -0.11917100 | -1.61812000 | 5.68625200  |
| C                        | -0.56116200 | 3.03747200  | -2.73715200 | C  | 3.57127200  | -2.86469800 | 0.68715900  |
| C                        | 1.84185700  | 3.25985700  | -2.95301200 | C  | 2.94497100  | -1.54048800 | 0.24321000  |
| C                        | -0.73242400 | 4.25388900  | -3.37826800 | C  | 1.38760800  | -3.13153500 | 0.25010800  |
| H                        | -1.42358100 | 2.45192300  | -2.42536600 | H  | 3.87869400  | -2.86525600 | 1.74083900  |
| C                        | 1.66654600  | 4.47494800  | -3.60012800 | H  | 3.33200700  | -1.25676000 | -0.74457100 |
| H                        | 2.84424400  | 2.85659900  | -2.82200800 | H  | 4.40467800  | -3.20662400 | 0.06832300  |
| C                        | 0.38230500  | 4.97863500  | -3.80437100 | O  | 2.49735000  | -3.82463000 | 0.54574300  |
| H                        | -1.73487700 | 4.63758000  | -3.55467200 | N  | 1.51875900  | -1.86693100 | 0.05878400  |
| H                        | 2.53255600  | 5.02795800  | -3.95591400 | C  | 3.10604700  | -0.40148400 | 1.23780600  |
| H                        | 0.24806100  | 5.93232700  | -4.31080200 | H  | 2.36911400  | 0.38422700  | 0.98349900  |
| <b>TS4'' S**2 = 0.70</b> |             |             |             | H  | 2.79321600  | -0.76401900 | 2.22950200  |
| C                        | -3.36626800 | -3.26942800 | -0.11031900 | C  | 4.48353500  | 0.20347900  | 1.31882100  |
| C                        | -2.81774600 | -1.83643500 | -0.17011600 | C  | 4.88560400  | 0.81602700  | 2.51100400  |
| C                        | -1.12197000 | -3.28392500 | -0.01489600 | C  | 5.35525300  | 0.24914200  | 0.22362500  |
| H                        | -3.92803300 | -3.55677700 | -1.00630400 | C  | 6.11103400  | 1.46603900  | 2.60608600  |
| H                        | -3.12013400 | -1.24362700 | 0.70612600  | H  | 4.21753700  | 0.78810900  | 3.37233700  |
| H                        | -3.97062800 | -3.49193700 | 0.77390300  | C  | 6.58370000  | 0.90172200  | 0.31548300  |
| O                        | -2.18198400 | -4.10808100 | -0.04831300 | H  | 5.08606500  | -0.22077000 | -0.72394800 |
| N                        | -1.35966000 | -2.02663700 | -0.08627300 | C  | 6.96394400  | 1.51514000  | 1.50494600  |
| C                        | -3.21872600 | -1.09272100 | -1.44124300 | H  | 6.40310300  | 1.93383800  | 3.54429500  |
| H                        | -2.63320300 | -0.16772800 | -1.49073500 | H  | 7.24535700  | 0.92598800  | -0.54789900 |
| H                        | -2.90921600 | -1.68839800 | -2.31297400 | H  | 7.92397200  | 2.02145900  | 1.57678000  |
| C                        | -4.69519500 | -0.81580900 | -1.48792300 | Cu | 0.00588000  | -0.48980900 | -0.11531600 |
| C                        | -5.51972000 | -1.45031000 | -2.42046100 | C  | -2.70591100 | 2.23559600  | 1.74066400  |
| C                        | -5.27650200 | 0.06905200  | -0.57121100 | C  | -2.04065600 | 1.50249500  | 0.75120000  |
| C                        | -6.89108800 | -1.20566800 | -2.44392800 | C  | -0.93121600 | 0.72648700  | 1.06958500  |
| H                        | -5.07787800 | -2.13635300 | -3.14476900 | C  | -0.50780800 | 0.67429100  | 2.39936200  |
| C                        | -6.64539300 | 0.31461700  | -0.59170900 | C  | -1.17416900 | 1.40799900  | 3.37878600  |
| H                        | -4.64426800 | 0.57027000  | 0.16487700  | C  | -2.28686000 | 2.20378300  | 3.07371500  |
| C                        | -7.45690900 | -0.32279000 | -1.52889700 | H  | -3.56613900 | 2.83770900  | 1.45054500  |
| H                        | -7.51742500 | -1.70562000 | -3.18008900 | H  | -2.40085400 | 1.57249400  | -0.27851100 |
| H                        | -7.08184400 | 1.00773600  | 0.12522900  | H  | 0.33594800  | 0.04619500  | 2.69544000  |
| H                        | -8.52753900 | -0.13009100 | -1.54541100 | H  | -0.82169300 | 1.34446400  | 4.40969200  |
| C                        | 0.18217300  | -4.01975900 | 0.11897400  | C  | -2.99285300 | 2.97175000  | 4.18966900  |
| C                        | 0.40510700  | -4.87553700 | -1.17778200 | C  | -1.99819300 | 3.93075500  | 4.85688900  |
| H                        | -0.50071300 | -5.47039400 | -1.34434300 | H  | -1.61627300 | 4.66891900  | 4.14059100  |
| H                        | 1.22758500  | -5.57131100 | -0.97380800 | H  | -2.48285500 | 4.47770200  | 5.67531400  |
| C                        | 0.09394700  | -4.90513600 | 1.40192100  | H  | -1.13682300 | 3.39920000  | 5.27880000  |
| H                        | -0.78337300 | -5.55322500 | 1.30061200  | C  | -3.50865000 | 1.97387800  | 5.23585400  |
| H                        | 0.97965200  | -5.54872500 | 1.42521400  | H  | -4.01126000 | 2.50160200  | 6.05609500  |
| C                        | 0.72818900  | -3.97975400 | -2.34338100 | H  | -4.22904600 | 1.27354700  | 4.79492900  |
| C                        | -0.28423500 | -3.27862800 | -3.00616000 | H  | -2.69373400 | 1.38363700  | 5.67318900  |
| C                        | 2.05932400  | -3.69970500 | -2.67302300 | C  | -4.17685600 | 3.78565000  | 3.67119200  |
| C                        | 0.02138200  | -2.29255700 | -3.94002800 | H  | -4.65299600 | 4.32253200  | 4.49976000  |
| H                        | -1.32731600 | -3.50696000 | -2.77889900 | H  | -3.86713800 | 4.53396400  | 2.93060900  |
| C                        | 2.37049800  | -2.71424400 | -3.60656900 | H  | -4.94275200 | 3.14883800  | 3.21074100  |
| H                        | 2.85804900  | -4.25549400 | -2.17952500 | C  | 2.23138900  | 0.91687600  | -1.74215800 |
| C                        | 1.35153600  | -1.99572600 | -4.23057100 | H  | 1.82847900  | -0.07830200 | -1.98166100 |
| H                        | -0.78001000 | -1.74685500 | -4.43437500 | H  | 3.07692500  | 0.79293400  | -1.06253400 |
| H                        | 3.41115400  | -2.50463300 | -3.85020300 | C  | 1.16287400  | 1.79567200  | -1.15486800 |
| H                        | 1.59454200  | -1.21684400 | -4.95087200 | C  | 1.47579800  | 2.82935500  | -0.20878500 |
| C                        | 0.01767200  | -4.05332100 | 2.64398200  | C  | 2.80119700  | 3.04309400  | 0.24976100  |
| C                        | 1.17417500  | -3.74932200 | 3.37115800  | C  | 0.45408900  | 3.63806300  | 0.35498600  |
| C                        | -1.19203100 | -3.47614800 | 3.04919900  | C  | 3.07906300  | 3.99453000  | 1.21739700  |
| C                        | 1.12729700  | -2.88057900 | 4.45927500  | H  | 3.62974100  | 2.47542600  | -0.16744500 |
| H                        | 2.11679500  | -4.21757100 | 3.08821800  | C  | 0.74027600  | 4.58442600  | 1.32067000  |
| C                        | -1.24195100 | -2.60283400 | 4.13155300  | H  | -0.57593500 | 3.49082300  | 0.04439300  |
| H                        | -2.10991100 | -3.73125400 | 2.51907500  | C  | 2.05319800  | 4.76835200  | 1.76287300  |
| C                        | -0.07968100 | -2.29653500 | 4.83587700  | H  | 4.10717900  | 4.13599900  | 1.54427600  |
| H                        | 2.03534200  | -2.67068300 | 5.02237500  | H  | -0.06755000 | 5.18155600  | 1.73883100  |
|                          |             |             |             | H  | 2.27492100  | 5.51172600  | 2.52573400  |

|   |             |            |             |   |             |             |             |
|---|-------------|------------|-------------|---|-------------|-------------|-------------|
| C | -0.12003100 | 1.68626800 | -1.90281300 | H | -3.61364700 | -3.65356000 | -2.70090900 |
| O | -0.59000300 | 0.54334500 | -2.07418900 | C | -0.76285100 | -1.65161700 | -4.38472500 |
| C | 2.80430800  | 1.45049000 | -3.03885900 | H | 0.57732900  | -2.87095600 | -3.23161500 |
| F | 3.76689900  | 0.62427300 | -3.49170800 | C | -2.08900900 | -1.36800700 | -4.70555700 |
| F | 3.34788700  | 2.67196900 | -2.88422700 | H | -4.15193100 | -1.89617200 | -4.36264700 |
| F | 1.86074700  | 1.54806300 | -3.99599500 | H | 0.04679200  | -1.10641200 | -4.86732700 |
| C | -0.77913600 | 2.85336600 | -2.50334100 | H | -2.32233800 | -0.59666100 | -5.43726100 |
| C | -2.12565900 | 2.74264100 | -2.88819000 | C | -3.94516500 | -2.12917100 | 0.18577700  |
| C | -0.08271200 | 4.04542700 | -2.76311700 | C | -3.05449100 | -0.88527200 | 0.22962900  |
| C | -2.76976800 | 3.81176900 | -3.49195900 | C | -1.79021200 | -2.69347100 | -0.05077600 |
| H | -2.65321000 | 1.80831800 | -2.69999500 | H | -4.69626800 | -2.10471800 | -0.61025200 |
| C | -0.72545300 | 5.10425000 | -3.38987600 | H | -3.22995200 | -0.30843800 | 1.14457400  |
| H | 0.96975400  | 4.12912100 | -2.49804500 | H | -4.42957300 | -2.37129100 | 1.13812200  |
| C | -2.06928900 | 4.99254900 | -3.74501500 | O | -3.02417700 | -3.20495500 | -0.11796700 |
| H | -3.81688900 | 3.72714800 | -3.77343400 | N | -1.68385300 | -1.44614100 | 0.25172600  |
| H | -0.17850300 | 6.01934800 | -3.60418700 | C | -3.19059300 | 0.02724500  | -0.98059600 |
| H | -2.57309600 | 5.82811500 | -4.22675600 | H | -2.43329400 | 0.82276000  | -0.88976000 |

## INT7''

|   |             |             |             |    |             |             |             |
|---|-------------|-------------|-------------|----|-------------|-------------|-------------|
| C | 2.77306300  | -3.32590100 | -1.24024800 | C  | -4.54662900 | 0.65055700  | -1.17371300 |
| C | 2.49791000  | -1.89923800 | -0.74764100 | C  | -4.79506800 | 1.35742500  | -2.35602800 |
| C | 0.63070500  | -3.12476700 | -0.59419900 | C  | -5.55803700 | 0.59248600  | -0.21084000 |
| H | 3.53900100  | -3.84698900 | -0.65549500 | C  | -6.00814500 | 2.00276500  | -0.52050000 |
| H | 2.62732600  | -1.15951500 | -1.55083700 | H  | -4.01295300 | 1.40893200  | -3.11567900 |
| H | 3.02143200  | -3.40527100 | -2.30264100 | C  | -6.77989100 | 1.23189300  | -0.41682900 |
| O | 1.51580400  | -4.02553900 | -1.03869600 | H  | -5.39783100 | 0.05901100  | 0.72766600  |
| N | 1.06068200  | -1.92941700 | -0.40247000 | C  | -7.00658600 | 1.94288100  | -1.59019500 |
| C | 3.36424100  | -1.50774200 | 0.44607900  | H  | -6.17877200 | 2.55274700  | -3.48552800 |
| H | 3.02245300  | -0.53950100 | 0.82855800  | H  | -7.55419400 | 1.17401600  | 0.34574300  |
| H | 3.19026000  | -2.22836400 | 1.25856700  | H  | -7.95841700 | 2.44422700  | -1.75132200 |
| C | 4.82154100  | -1.47814200 | 0.07623100  | Cu | 0.05478900  | -0.31213200 | 0.31838800  |
| C | 5.72374000  | -2.38575700 | 0.63697900  | C  | 2.74089200  | 2.29690600  | -1.78179500 |
| C | 5.29609400  | -0.55847200 | -0.86712100 | C  | 2.21725400  | 1.56755700  | -0.70601700 |
| C | 7.06895800  | -2.37246700 | 0.27504800  | C  | 0.99404100  | 0.93342700  | -0.83701100 |
| H | 5.36717000  | -3.10369600 | 1.37738300  | C  | 0.29469700  | 1.01476200  | -2.04278000 |
| C | 6.63821300  | -0.54372900 | -1.23195800 | C  | 0.83086900  | 1.74159300  | -3.10323400 |
| H | 4.60337400  | 0.15762400  | -1.31411600 | C  | 2.06076200  | 2.40553800  | -2.99637800 |
| C | 7.52896200  | -1.45140100 | -0.66133700 | H  | 3.70210800  | 2.78950100  | -1.64432500 |
| H | 7.75815600  | -3.08299600 | 0.72696600  | H  | 2.78930700  | 1.51621600  | 0.21837800  |
| H | 6.99253000  | 0.18099800  | -1.96296100 | H  | -0.65830400 | 0.50262100  | -2.18740100 |
| H | 8.57899000  | -1.43877800 | -0.94573300 | H  | 0.26857800  | 1.78526800  | -4.03739700 |
| C | -0.73916200 | -3.70736200 | -0.40033000 | C  | 2.59641400  | 3.20099800  | -4.18443700 |
| C | -0.66950500 | -4.76860100 | 0.74440900  | C  | 1.60378400  | 4.32045300  | -4.52591900 |
| H | 0.09163900  | -5.50599900 | 0.46224500  | H  | 1.47454100  | 5.00814300  | -3.68088300 |
| H | -1.63614200 | -5.28597700 | 0.76447700  | H  | 1.96348300  | 4.90390500  | -5.38247000 |
| C | -1.17667900 | -4.37652400 | -1.74644300 | H  | 0.61550200  | 3.92333500  | -4.78827800 |
| H | -0.37300100 | -5.05691300 | -2.04857700 | C  | 2.74163800  | 2.26724900  | -5.39373500 |
| H | -2.06083300 | -4.98728500 | -1.53654100 | H  | 3.11629800  | 2.82229900  | -6.26255900 |
| C | -0.37155700 | -4.13693900 | 2.07530200  | H  | 3.44713200  | 1.45313000  | -5.18570200 |
| C | 0.93807900  | -3.79635400 | 2.42972000  | H  | 1.78384400  | 1.81573900  | -5.68081700 |
| C | -1.41103900 | -3.79601500 | 2.94764500  | C  | 3.95770600  | 3.82846500  | -3.89051300 |
| C | 1.20402900  | -3.11450100 | 3.61471000  | H  | 4.30977700  | 4.38317300  | -4.76768300 |
| H | 1.76031100  | -4.08327500 | 1.77111500  | H  | 3.91256400  | 4.53569600  | -3.05307000 |
| C | -1.14882800 | -3.12822000 | 4.14050100  | H  | 4.71642900  | 3.07069400  | -3.65621000 |
| H | -2.43483500 | -4.07366000 | 2.69075200  | C  | -0.91527800 | 0.22007000  | 2.72641800  |
| C | 0.15873800  | -2.77564900 | 4.47170700  | H  | -0.24653900 | -0.65249100 | 2.77097100  |
| H | 2.22853400  | -2.85300500 | 3.87304500  | H  | -1.91126600 | -0.15752600 | 2.48953500  |
| H | -1.96565900 | -2.87707500 | 4.81360800  | C  | -0.40712200 | 1.22544700  | 1.68950300  |
| H | 0.36105900  | -2.23984600 | 5.39706000  | C  | -1.35533900 | 2.21571100  | 1.14125200  |
| C | -1.48496100 | -3.36473700 | -2.82062000 | C  | -2.71616100 | 2.24251900  | 1.50488200  |
| C | -2.81109400 | -3.08425600 | -3.16929900 | C  | -0.92155500 | 3.16942400  | 0.19453600  |
| C | -0.46542100 | -2.64186000 | -3.45266200 | C  | -3.59855000 | 3.15678000  | 0.93988100  |
| C | -3.11328600 | -2.09705400 | -4.10472300 | H  | -3.09361800 | 1.56689100  | 2.26842600  |
|   |             |             |             | C  | -1.80460500 | 4.07247700  | -0.37538400 |

|   |             |             |             |
|---|-------------|-------------|-------------|
| H | 0.12501900  | 3.19122000  | -0.09885300 |
| C | -3.15296400 | 4.06638000  | -0.01395600 |
| H | -4.64370100 | 3.14946300  | 1.24164300  |
| H | -1.43706400 | 4.78692000  | -1.10950300 |
| H | -3.84964600 | 4.76678200  | -0.46973300 |
| C | 1.01396100  | 1.59808500  | 2.08644100  |
| O | 1.81696200  | 0.66811600  | 2.20320400  |
| C | -0.98089500 | 0.74752900  | 4.15364300  |
| F | -1.61878300 | -0.13884900 | 4.94175400  |
| F | -1.65685500 | 1.91228000  | 4.23700100  |
| F | 0.23636200  | 0.95612700  | 4.67811400  |
| C | 1.43155600  | 2.98019300  | 2.40823600  |
| C | 2.80911400  | 3.25505600  | 2.38920000  |
| C | 0.54320700  | 3.98407700  | 2.82595800  |
| C | 3.28355100  | 4.51193400  | 2.73094000  |
| H | 3.49552300  | 2.45706400  | 2.11253900  |
| C | 1.02519000  | 5.23461100  | 3.19347900  |
| H | -0.52163300 | 3.78242600  | 2.89877600  |
| C | 2.39017900  | 5.50589900  | 3.13225900  |
| H | 4.35125900  | 4.71755200  | 2.69867600  |
| H | 0.33125600  | 6.00038400  | 3.53253100  |
| H | 2.76135800  | 6.49048700  | 3.40982300  |

**TS5''**

|   |             |             |             |
|---|-------------|-------------|-------------|
| C | -2.74447000 | -3.67950600 | -0.19350000 |
| C | -2.47818300 | -2.16861200 | -0.22308300 |
| C | -0.56488200 | -3.27180100 | -0.53901000 |
| H | -3.46856500 | -4.01028400 | -0.94533200 |
| H | -2.73654100 | -1.69006300 | 0.73318800  |
| H | -3.04347300 | -4.07109100 | 0.78444200  |
| O | -1.46311600 | -4.27249000 | -0.52338700 |
| N | -1.01382700 | -2.08046100 | -0.38088900 |
| C | -3.22183100 | -1.46556300 | -1.35825100 |
| H | -2.84705200 | -0.43926700 | -1.44200000 |
| H | -2.95943600 | -1.95471800 | -2.30786300 |
| C | -4.71152300 | -1.49891200 | -1.15554000 |
| C | -5.54678400 | -2.16610800 | -2.05519100 |
| C | -5.29080700 | -0.87735800 | -0.04271100 |
| C | -6.92518600 | -2.20506300 | -1.85666600 |
| H | -5.10999300 | -2.65271500 | -2.92838600 |
| C | -6.66618400 | -0.91532400 | 0.16034900  |
| H | -4.65069400 | -0.36028400 | 0.67472900  |
| C | -7.48832000 | -1.57973500 | -0.74816000 |
| H | -7.55973600 | -2.72627600 | -2.57067000 |
| H | -7.09932400 | -0.42409600 | 1.03006800  |
| H | -8.56436400 | -1.60967100 | -0.59087600 |
| C | 0.83825200  | -3.76604900 | -0.76505300 |
| C | 0.94013000  | -4.28551000 | -2.24454500 |
| H | 0.10484600  | -4.97459000 | -2.41771500 |
| H | 1.86940200  | -4.86139200 | -2.32600900 |
| C | 1.13187500  | -4.88655600 | 0.28527300  |
| H | 0.32517800  | -5.62475200 | 0.23068300  |
| H | 2.06035700  | -5.38668200 | -0.00890300 |
| C | 0.93654800  | -3.12157900 | -3.19950100 |
| C | -0.25908900 | -2.47753700 | -3.53189900 |
| C | 2.14096400  | -2.55179900 | -3.62898200 |
| C | -0.25579400 | -1.26788400 | -4.22053200 |
| H | -1.20628900 | -2.92880200 | -3.23237200 |
| C | 2.15099400  | -1.34479100 | -4.32361200 |
| H | 3.07990500  | -3.05789900 | -3.40152400 |
| C | 0.95280900  | -0.68821900 | -4.60260700 |
| H | -1.19662100 | -0.76985300 | -4.44596900 |
| H | 3.09686900  | -0.91482500 | -4.64965000 |

|    |             |             |             |
|----|-------------|-------------|-------------|
| H  | 0.95957400  | 0.26403700  | -5.13004200 |
| C  | 1.26520500  | -4.28921900 | 1.66397100  |
| C  | 2.52936600  | -4.04668500 | 2.21294300  |
| C  | 0.13995100  | -3.85217000 | 2.37359100  |
| C  | 2.66766100  | -3.35771700 | 3.41582300  |
| H  | 3.41315100  | -4.40677400 | 1.68659200  |
| C  | 0.27375400  | -3.15493000 | 3.57039800  |
| H  | -0.85595300 | -4.07189600 | 1.98911900  |
| C  | 1.54004900  | -2.89232800 | 4.08886600  |
| H  | 3.66048000  | -3.19031600 | 3.83164800  |
| H  | -0.61521100 | -2.82010700 | 4.10260100  |
| H  | 1.64526200  | -2.34859800 | 5.02602800  |
| C  | 4.08968000  | -2.20717500 | -0.46488700 |
| C  | 3.22524600  | -0.94621000 | -0.36986800 |
| C  | 1.91298100  | -2.72585200 | -0.60561900 |
| H  | 4.62995000  | -2.43003200 | 0.46450400  |
| H  | 3.40217500  | -0.30212900 | -1.24429000 |
| H  | 4.79408800  | -2.21486400 | -1.30061000 |
| O  | 3.13684400  | -3.27105400 | -0.68241500 |
| N  | 1.84051600  | -1.45222900 | -0.45186600 |
| C  | 3.44751600  | -0.15603900 | 0.91673800  |
| H  | 2.66258400  | 0.61333700  | 0.99533500  |
| H  | 3.28734400  | -0.83280500 | 1.76949300  |
| C  | 4.81177100  | 0.47218400  | 0.97624400  |
| C  | 5.73310900  | 0.09469700  | 1.95567400  |
| C  | 5.19263600  | 1.43637300  | 0.03386400  |
| C  | 7.00085500  | 0.67004400  | 2.00195400  |
| H  | 5.44661400  | -0.65474600 | 2.69514600  |
| C  | 6.45695500  | 2.01486300  | 0.07839900  |
| H  | 4.49725900  | 1.73901100  | -0.75411400 |
| C  | 7.36457900  | 1.63224600  | 1.06430700  |
| H  | 7.70516500  | 0.36574800  | 2.77347600  |
| H  | 6.73509700  | 2.76479500  | -0.65918400 |
| H  | 8.35384300  | 2.08320900  | 1.09941600  |
| Cu | 0.09426800  | -0.34638000 | -0.28885200 |
| C  | -2.84655900 | 1.07383500  | 2.22385700  |
| C  | -2.16417400 | 0.99651400  | 1.00738000  |
| C  | -0.78551800 | 0.79082400  | 0.99773100  |
| C  | -0.09432100 | 0.72256800  | 2.21350100  |
| C  | -0.79443300 | 0.75997200  | 3.41159600  |
| C  | -2.18435300 | 0.95238400  | 3.44877100  |
| H  | -3.92246300 | 1.23835000  | 2.19968600  |
| H  | -2.72958000 | 1.08566300  | 0.08031600  |
| H  | 0.99174900  | 0.63200900  | 2.23530800  |
| H  | -0.23664100 | 0.66058900  | 4.34327800  |
| C  | -2.89716500 | 1.04954300  | 4.79357800  |
| C  | -2.34296100 | 2.25599200  | 5.56425600  |
| H  | -2.51429900 | 3.18952100  | 5.01400400  |
| H  | -2.83413900 | 2.34533900  | 6.54106000  |
| H  | -1.26442000 | 2.16718400  | 5.74195300  |
| C  | -2.63505900 | -0.23041400 | 5.59924400  |
| H  | -3.12892000 | -0.17353800 | 6.57694900  |
| H  | -3.02354500 | -1.11489800 | 5.07834400  |
| H  | -1.56490800 | -0.38992100 | 5.78094000  |
| C  | -4.40690900 | 1.22210700  | 4.63592000  |
| H  | -4.88160800 | 1.27000700  | 5.62245400  |
| H  | -4.66197900 | 2.14864700  | 4.10674600  |
| H  | -4.86189600 | 0.38281200  | 4.09367500  |
| C  | 1.44404700  | 1.55935900  | -1.42535100 |
| H  | 1.20687700  | 0.64377400  | -1.98816700 |
| H  | 2.32990900  | 1.35685600  | -0.82780700 |
| C  | 0.26445500  | 2.00903100  | -0.54753100 |
| C  | 0.57568400  | 3.07116800  | 0.44679400  |

|   |             |            |             |
|---|-------------|------------|-------------|
| C | 1.89202700  | 3.32563600 | 0.86689000  |
| C | -0.45626400 | 3.77653700 | 1.09747700  |
| C | 2.16555000  | 4.23638600 | 1.88297600  |
| H | 2.73684700  | 2.82663900 | 0.39881000  |
| C | -0.18420200 | 4.69258900 | 2.10008000  |
| H | -1.49156000 | 3.58168100 | 0.82747400  |
| C | 1.13090900  | 4.92470600 | 2.50576800  |
| H | 3.19839700  | 4.40610200 | 2.18014100  |
| H | -1.00572500 | 5.22205800 | 2.57841600  |
| H | 1.34347800  | 5.63581200 | 3.30108500  |
| C | -0.95555000 | 2.03863800 | -1.45291300 |
| O | -1.27174600 | 0.94916000 | -1.94581000 |
| C | 1.88332000  | 2.53598300 | -2.50257400 |
| F | 2.96479500  | 2.02573100 | -3.12973200 |
| F | 2.22948700  | 3.74507100 | -2.02622400 |
| F | 0.92561800  | 2.72569700 | -3.42923400 |
| C | -1.72252000 | 3.24983100 | -1.78737500 |
| C | -3.06425300 | 3.08206400 | -2.16663500 |
| C | -1.15468000 | 4.53311900 | -1.81179600 |
| C | -3.83210100 | 4.17859900 | -2.52967900 |
| H | -3.49041500 | 2.07951900 | -2.16310800 |
| C | -1.91892800 | 5.62291300 | -2.20757100 |
| H | -0.10924800 | 4.67457900 | -1.54811100 |
| C | -3.25838100 | 5.45002600 | -2.55392300 |
| H | -4.87623100 | 4.04470600 | -2.80327500 |
| H | -1.46910200 | 6.61231300 | -2.24453400 |
| H | -3.85699500 | 6.30950800 | -2.84888000 |

#### 4c

|   |             |             |             |
|---|-------------|-------------|-------------|
| C | -3.31611600 | 1.05793700  | -0.06172600 |
| C | -1.94051400 | 1.26163200  | 0.00349200  |
| C | -1.06153700 | 0.23023900  | 0.33868200  |
| C | -1.61801900 | -1.03226000 | 0.56971300  |
| C | -2.98995100 | -1.23329800 | 0.49327400  |
| C | -3.87770600 | -0.19619800 | 0.18513100  |
| H | -3.95206300 | 1.90181800  | -0.32063200 |
| H | -1.55432800 | 2.25113700  | -0.23954300 |
| H | -0.98374400 | -1.87649200 | 0.82784900  |
| H | -3.37795400 | -2.23389000 | 0.68583300  |
| C | -5.37775700 | -0.47046500 | 0.12298800  |
| C | -5.65462300 | -1.53520800 | -0.94669500 |
| H | -5.32975300 | -1.19552900 | -1.93791800 |
| H | -6.72868300 | -1.75694000 | -0.99969300 |
| H | -5.13248300 | -2.47487800 | -0.72979500 |
| C | -5.85526600 | -0.99117900 | 1.48508100  |
| H | -6.93173000 | -1.20591000 | 1.45865700  |
| H | -5.67663400 | -0.25326000 | 2.27680100  |
| H | -5.33951100 | -1.91572000 | 1.77086100  |
| C | -6.17952500 | 0.78276200  | -0.22342600 |
| H | -7.24986400 | 0.54524800  | -0.25332400 |
| H | -5.90442400 | 1.18622800  | -1.20606300 |
| H | -6.03885000 | 1.57676400  | 0.52074000  |
| C | 0.71930400  | 1.78743200  | 1.11656600  |
| H | 0.25126100  | 2.65099500  | 0.63466700  |
| H | 0.22860900  | 1.66254100  | 2.08788500  |
| C | 0.46206200  | 0.49275000  | 0.30631900  |
| C | 0.80192800  | 0.57122800  | -1.18150500 |
| C | 1.08592200  | 1.76392700  | -1.84964300 |
| C | 0.71178600  | -0.60215300 | -1.94360500 |
| C | 1.31376300  | 1.77751800  | -3.22530600 |
| H | 1.15117500  | 2.70094500  | -1.30332000 |
| C | 0.94386500  | -0.59418000 | -3.31167600 |
| H | 0.45773100  | -1.54015000 | -1.44863600 |

|   |            |             |             |
|---|------------|-------------|-------------|
| C | 1.25265900 | 0.60022100  | -3.96116300 |
| H | 1.54104300 | 2.72062500  | -3.71939700 |
| H | 0.87863900 | -1.52354800 | -3.87456400 |
| H | 1.43441900 | 0.61180400  | -5.03416000 |
| C | 1.17910700 | -0.64141500 | 1.10774700  |
| O | 0.72081800 | -0.91739800 | 2.20517500  |
| C | 2.14334500 | 2.18252800  | 1.42163500  |
| F | 2.15404200 | 3.33498500  | 2.12133000  |
| F | 2.79047200 | 1.26050400  | 2.16105300  |
| F | 2.89786500 | 2.39033600  | 0.31749100  |
| C | 2.37164800 | -1.37860300 | 0.60531600  |
| C | 2.55661000 | -2.67768300 | 1.09939800  |
| C | 3.33651000 | -0.83431400 | -0.25316100 |
| C | 3.65847200 | -3.43062800 | 0.71741700  |
| H | 1.81621200 | -3.07664700 | 1.78987900  |
| C | 4.45467200 | -1.57927300 | -0.60941400 |
| H | 3.23037900 | 0.18031800  | -0.62636900 |
| C | 4.61171100 | -2.88100000 | -0.13838700 |
| H | 3.78093000 | -4.44441500 | 1.09407300  |
| H | 5.20621100 | -1.14050600 | -1.26272800 |
| H | 5.48136700 | -3.46570000 | -0.43366300 |

#### INT2'

|   |             |             |             |
|---|-------------|-------------|-------------|
| C | 2.61942000  | -1.28118500 | -2.98397700 |
| C | 2.35837500  | -0.92719300 | -1.51218700 |
| C | 0.42807900  | -1.33339000 | -2.52580700 |
| H | 3.13019900  | -2.24664400 | -3.10313200 |
| H | 2.60078100  | 0.12594900  | -1.29921300 |
| H | 3.15505800  | -0.51693700 | -3.55417900 |
| O | 1.29725800  | -1.41564800 | -3.56360200 |
| N | 0.90862400  | -1.07768000 | -1.37068500 |
| C | 3.09752400  | -1.80265300 | -0.50609900 |
| H | 2.58746900  | -1.67321500 | 0.45940900  |
| H | 2.97510100  | -2.85768100 | -0.78921600 |
| C | 4.54664300  | -1.42579400 | -0.39662500 |
| C | 5.56774800  | -2.29823100 | -0.77855400 |
| C | 4.89655300  | -0.15489300 | 0.07936300  |
| C | 6.90487800  | -1.91742700 | -0.68047200 |
| H | 5.30734200  | -3.29124700 | -1.14891100 |
| C | 6.22908000  | 0.22820600  | 0.18151100  |
| H | 4.10252800  | 0.53081400  | 0.38410100  |
| C | 7.23919200  | -0.65416400 | -0.20007300 |
| H | 7.68846900  | -2.61204600 | -0.97894500 |
| H | 6.47772000  | 1.21769200  | 0.56371300  |
| H | 8.28378400  | -0.35821400 | -0.12092100 |
| C | -0.98736700 | -1.66610000 | -2.89533000 |
| C | -1.01751100 | -3.19188200 | -3.25034700 |
| H | -0.63140000 | -3.29050000 | -4.27312400 |
| H | -2.07068000 | -3.49984000 | -3.26910100 |
| C | -1.41810100 | -0.86215100 | -4.15848200 |
| H | -0.63630700 | -1.00377800 | -4.91409800 |
| H | -2.33365200 | -1.32578300 | -4.54307900 |
| C | -0.19922000 | -4.03203700 | -2.31118800 |
| C | 1.03453700  | -4.54523700 | -2.72376100 |
| C | -0.60623500 | -4.23306200 | -0.98849900 |
| C | 1.84315900  | -5.25195900 | -1.83614300 |
| H | 1.36048300  | -4.38405600 | -3.75274500 |
| C | 0.20256600  | -4.93296400 | -0.09693000 |
| H | -1.55847700 | -3.83705600 | -0.63495600 |
| C | 1.42913600  | -5.44298900 | -0.51935600 |
| H | 2.79787900  | -5.65400600 | -2.17491600 |
| H | -0.12963700 | -5.08005800 | 0.92978500  |
| H | 2.05947900  | -5.99103800 | 0.17873900  |

|    |             |             |             |
|----|-------------|-------------|-------------|
| C  | -1.65319700 | 0.59763500  | -3.88932000 |
| C  | -2.95332400 | 1.10963300  | -3.83718700 |
| C  | -0.58347300 | 1.46831000  | -3.64904900 |
| C  | -3.18224500 | 2.45481100  | -3.55697200 |
| H  | -3.79233800 | 0.43890700  | -4.02191900 |
| C  | -0.80966500 | 2.81111100  | -3.36049900 |
| H  | 0.43936800  | 1.09221900  | -3.70953200 |
| C  | -2.11112000 | 3.30888600  | -3.30983800 |
| H  | -4.20164100 | 2.83792000  | -3.53911100 |
| H  | 0.03441500  | 3.47926400  | -3.19349500 |
| H  | -2.28487200 | 4.35928900  | -3.08761700 |
| C  | -4.10325500 | -1.17671800 | -1.09814800 |
| C  | -3.13722300 | -0.59275900 | -0.06140200 |
| C  | -1.98213500 | -1.34970000 | -1.80675000 |
| H  | -4.83949300 | -0.45788300 | -1.47831500 |
| H  | -3.21710800 | -1.13239000 | 0.88651100  |
| H  | -4.61846100 | -2.07744100 | -0.74933600 |
| O  | -3.25499500 | -1.56349400 | -2.20690600 |
| N  | -1.80711700 | -0.86577100 | -0.63014700 |
| C  | -3.27797800 | 0.91225500  | 0.18593100  |
| H  | -2.53592100 | 1.18397500  | 0.95374900  |
| H  | -3.00072300 | 1.45180600  | -0.73388400 |
| C  | -4.66520000 | 1.29916100  | 0.61405500  |
| C  | -5.47602200 | 2.07183600  | -0.22218000 |
| C  | -5.19278800 | 0.85678300  | 1.83328600  |
| C  | -6.77667900 | 2.40586900  | 0.14803700  |
| H  | -5.07024100 | 2.41882000  | -1.17432000 |
| C  | -6.49193500 | 1.18749400  | 2.20491100  |
| H  | -4.57673000 | 0.25165000  | 2.49782700  |
| C  | -7.28829900 | 1.96342100  | 1.36435500  |
| H  | -7.39057000 | 3.01296000  | -0.51548800 |
| H  | -6.88503100 | 0.83797600  | 3.15807100  |
| H  | -8.30417600 | 2.22172500  | 1.65777100  |
| Cu | -0.10403400 | -0.96949700 | 0.47356100  |
| C  | 1.80554500  | 0.73854900  | 2.37658800  |
| C  | 2.49611100  | 2.89253400  | 1.25239000  |
| C  | 3.31023000  | 3.97859500  | 0.98808900  |
| C  | 4.43307800  | 4.15620700  | 1.79670500  |
| C  | 4.69228000  | 3.26132300  | 2.83021100  |
| C  | 3.85226900  | 2.17343000  | 3.04987400  |
| C  | 2.73168900  | 1.95364700  | 2.24206400  |
| H  | 3.10638800  | 4.66824900  | 0.17515200  |
| H  | 5.10216200  | 4.99269900  | 1.60583900  |
| H  | 5.56686800  | 3.40066500  | 3.46255700  |
| H  | 4.07661900  | 1.46824000  | 3.84824900  |
| I  | 0.74443000  | 2.38023200  | 0.04004700  |
| O  | 1.35099900  | 0.43889600  | 1.06824000  |
| C  | 2.55555500  | -0.47971100 | 2.90550600  |
| H  | 2.83997400  | -0.34611700 | 3.95640500  |
| H  | 1.89715700  | -1.35213100 | 2.84741200  |
| H  | 3.46467900  | -0.67305200 | 2.32371800  |
| C  | 0.63630700  | 1.06760400  | 3.30701800  |
| H  | -0.02022400 | 0.19490400  | 3.36943800  |
| H  | 0.98348500  | 1.31663800  | 4.31741100  |
| H  | 0.04741600  | 1.91791200  | 2.93900300  |
| C  | 0.56522900  | 4.61910200  | -0.54271300 |
| F  | -0.67885700 | 4.82652500  | -0.99720700 |
| F  | 1.42489500  | 4.98350000  | -1.51593700 |
| F  | 0.76100600  | 5.42588700  | 0.50609600  |
| S  | -1.27054500 | -3.01138100 | 2.52888400  |
| O  | -0.90588900 | -4.20913000 | 3.27737100  |
| O  | -2.30319800 | -3.13683700 | 1.48977300  |
| O  | -0.08594200 | -2.17726900 | 2.11578600  |

|   |             |             |            |
|---|-------------|-------------|------------|
| C | -2.06024800 | -1.89899800 | 3.76686400 |
| F | -1.23287100 | -1.63485300 | 4.78334300 |
| F | -3.18360900 | -2.42924600 | 4.25319400 |
| F | -2.37994900 | -0.71549700 | 3.18318900 |

**TS1'** S\*\*2 = 1.48

|   |             |             |             |
|---|-------------|-------------|-------------|
| C | 1.78351800  | 2.06692000  | 2.88365200  |
| C | 1.45685200  | 1.74941100  | 1.41739600  |
| C | -0.06538100 | 0.80876500  | 2.73898100  |
| H | 1.65885800  | 3.13028700  | 3.12928000  |
| H | 2.21558000  | 1.09918900  | 0.96008600  |
| H | 2.76991800  | 1.73140400  | 3.21615300  |
| O | 0.79118900  | 1.32903300  | 3.64570800  |
| N | 0.21604700  | 0.97565500  | 1.50394600  |
| C | 1.26171200  | 2.96627900  | 0.51825800  |
| H | 0.75367300  | 2.61596000  | -0.39205600 |
| H | 0.57195400  | 3.67104800  | 1.00480300  |
| C | 2.57164400  | 3.61471600  | 0.17681100  |
| C | 2.90060500  | 4.89647000  | 0.62157600  |
| C | 3.51060200  | 2.90829700  | -0.58635100 |
| C | 4.13340000  | 5.46508400  | 0.30590900  |
| H | 2.17474600  | 5.45637100  | 1.21389100  |
| C | 4.74059300  | 3.47238500  | -0.90503100 |
| H | 3.25643900  | 1.90555200  | -0.93746700 |
| C | 5.05591700  | 4.75516800  | -0.45785700 |
| H | 4.37251800  | 6.46788400  | 0.65652500  |
| H | 5.45224100  | 2.90846300  | -1.50703500 |
| H | 6.01765300  | 5.20063400  | -0.70643200 |
| C | -1.27729300 | 0.17449700  | 3.36010600  |
| C | -2.03070100 | 1.30104000  | 4.14287200  |
| H | -1.46479700 | 1.48698200  | 5.06391600  |
| H | -3.00855200 | 0.89958100  | 4.43497500  |
| C | -0.83493400 | -0.93215400 | 4.36278400  |
| H | -0.20210200 | -0.45065100 | 5.11739800  |
| H | -1.74013400 | -1.28793000 | 4.87010900  |
| C | -2.15356200 | 2.57440300  | 3.35261800  |
| C | -1.34922500 | 3.67302600  | 3.67309800  |
| C | -2.99156000 | 2.65953100  | 2.23535300  |
| C | -1.37971300 | 4.82939700  | 2.89704500  |
| H | -0.68906900 | 3.61124400  | 4.53949800  |
| C | -3.01920100 | 3.81013600  | 1.45383800  |
| H | -3.62848600 | 1.81868000  | 1.95621600  |
| C | -2.21093700 | 4.89641800  | 1.78142400  |
| H | -0.74933000 | 5.67737000  | 3.16409300  |
| H | -3.65631100 | 3.83880300  | 0.57441200  |
| H | -2.22654300 | 5.79114100  | 1.16200800  |
| C | -0.10521300 | -2.07178600 | 3.70994300  |
| C | -0.81140000 | -3.13852200 | 3.14222600  |
| C | 1.29034000  | -2.07156200 | 3.61976200  |
| C | -0.14398600 | -4.17687200 | 2.50101100  |
| H | -1.89949600 | -3.15454800 | 3.22006200  |
| C | 1.96362000  | -3.11702600 | 2.99023100  |
| H | 1.85211600  | -1.24660100 | 4.06044600  |
| C | 1.24712700  | -4.17089200 | 2.42388300  |
| H | -0.71035400 | -5.00032700 | 2.06889700  |
| H | 3.05236100  | -3.11476400 | 2.94586500  |
| H | 1.77263200  | -4.98492500 | 1.93065300  |
| C | -4.08683500 | -1.55543000 | 1.82455800  |
| C | -3.27419400 | -1.23624200 | 0.56368900  |
| C | -2.20623200 | -0.44549800 | 2.35175100  |
| H | -4.15891900 | -2.63070600 | 2.03831200  |
| H | -3.78920200 | -0.49773900 | -0.06389400 |
| H | -5.08989800 | -1.12111600 | 1.83691700  |

|              |                    |             |             |    |             |             |             |
|--------------|--------------------|-------------|-------------|----|-------------|-------------|-------------|
| O            | -3.33466200        | -0.94390900 | 2.90653300  | C  | 4.46237400  | 1.19296900  | 0.55152200  |
| N            | -2.06897900        | -0.57882300 | 1.08699900  | C  | 5.44372900  | 1.80659300  | 1.33296300  |
| C            | -2.90881500        | -2.44300900 | -0.29618100 | C  | 4.86368400  | 0.40297000  | -0.53345700 |
| H            | -2.11939600        | -2.11619500 | -0.98978700 | C  | 6.79603400  | 1.64409300  | 1.03637100  |
| H            | -2.47446100        | -3.22965800 | 0.33983300  | H  | 5.13958600  | 2.42889100  | 2.17697900  |
| C            | -4.09825700        | -2.95410400 | -1.05810700 | C  | 6.21139500  | 0.23807900  | -0.83109200 |
| C            | -4.70787700        | -4.17108400 | -0.74777100 | H  | 4.09962800  | -0.07762500 | -1.14775700 |
| C            | -4.64184000        | -2.16823800 | -2.08132600 | C  | 7.18286800  | 0.85856800  | -0.04569800 |
| C            | -5.83480700        | -4.60050500 | -1.44671600 | H  | 7.54869500  | 2.13409800  | 1.65229200  |
| H            | -4.28898500        | -4.79284600 | 0.04559400  | H  | 6.50347800  | -0.37672600 | -1.68156100 |
| C            | -5.76564900        | -2.59413600 | -2.77926900 | H  | 8.23875800  | 0.73106500  | -0.27855700 |
| H            | -4.16857000        | -1.21723400 | -2.32572200 | C  | -0.73718100 | 0.13412300  | 3.25648600  |
| C            | -6.36625600        | -3.81255800 | -2.46360300 | C  | -0.64489000 | 1.40374100  | 4.16818300  |
| H            | -6.29691400        | -5.55411600 | -1.19600200 | H  | -0.11476800 | 1.09914800  | 5.07929300  |
| H            | -6.17281600        | -1.97062100 | -3.57383800 | H  | -1.67215100 | 1.65581900  | 4.46258200  |
| H            | -7.24611100        | -4.14714600 | -3.01045600 | C  | -1.11463700 | -1.07770200 | 4.16140700  |
| Cu           | -0.68450800        | 0.25493200  | -0.20514800 | H  | -0.25396200 | -1.26519900 | 4.81445200  |
| C            | 1.30568900         | 0.12032900  | -2.46601800 | H  | -1.94280200 | -0.75088800 | 4.80139500  |
| C            | 3.58366100         | -0.85742200 | -1.84950600 | C  | 0.05747700  | 2.57095500  | 3.53429600  |
| C            | 4.95622300         | -1.00907500 | -1.98036200 | C  | 1.31694100  | 2.96422100  | 3.99773600  |
| C            | 5.59556100         | -0.38011700 | -3.04626200 | C  | -0.50243800 | 3.25149100  | 2.44702600  |
| C            | 4.85208200         | 0.37288600  | -3.94853100 | C  | 1.99761300  | 4.02074600  | 3.39646900  |
| C            | 3.48039500         | 0.51920100  | -3.77336300 | H  | 1.76333100  | 2.43381800  | 4.84030600  |
| C            | 2.80696100         | -0.08129100 | -2.70274800 | C  | 0.18350200  | 4.29432400  | 1.83228800  |
| H            | 5.53214800         | -1.58791200 | -1.26601100 | H  | -1.48468000 | 2.97365400  | 2.06282900  |
| H            | 6.67300500         | -0.48086900 | -3.15881300 | C  | 1.43469000  | 4.68209500  | 2.30768000  |
| H            | 5.34347600         | 0.86504500  | -4.78549300 | H  | 2.97317300  | 4.32203200  | 3.77629200  |
| H            | 2.91284700         | 1.13146300  | -4.47137300 | H  | -0.26134800 | 4.78893700  | 0.97304000  |
| I            | 2.55195900         | -1.79080300 | -0.20857900 | H  | 1.97086600  | 5.49734100  | 1.82586000  |
| O            | 1.08552800         | 0.05409200  | -1.07364300 | C  | -1.50557500 | -2.32184200 | 3.41296800  |
| C            | 0.86692500         | 1.50341300  | -2.94991100 | C  | -2.85343500 | -2.67324100 | 3.27714100  |
| H            | 0.84202200         | 1.56699900  | -4.04502700 | C  | -0.53877100 | -3.14716300 | 2.82914800  |
| H            | -0.14396300        | 1.70675600  | -2.58714600 | C  | -3.22819400 | -3.81423000 | 2.57238000  |
| H            | 1.53403200         | 2.28747400  | -2.57079200 | H  | -3.61289900 | -2.04330300 | 3.74008400  |
| C            | 0.51672300         | -0.96734900 | -3.20259100 | C  | -0.91068900 | -4.29460500 | 2.13233600  |
| H            | -0.55626100        | -0.79178000 | -3.05956400 | H  | 0.51891200  | -2.90073100 | 2.93869800  |
| H            | 0.72922000         | -0.96413700 | -4.27937700 | C  | -2.25655200 | -4.62684700 | 1.99362200  |
| H            | 0.76354600         | -1.96364800 | -2.81235400 | H  | -4.28172800 | -4.07617400 | 2.48650300  |
| C            | 4.46383000         | -3.48549500 | 0.02383900  | H  | -0.14349200 | -4.94002300 | 1.70648500  |
| F            | 3.97973700         | -4.48242900 | 0.78443200  | H  | -2.54400700 | -5.52297700 | 1.44759400  |
| F            | 5.54309000         | -2.98180100 | 0.65129300  | C  | -3.99382900 | 0.49749300  | 1.67859700  |
| F            | 4.85676000         | -4.00341900 | -1.14538900 | C  | -3.12955600 | 0.35180200  | 0.42282700  |
| S            | -2.84528100        | 1.73716500  | -1.63139100 | C  | -1.83057100 | 0.30126600  | 2.24123000  |
| O            | -1.93761700        | 2.86422800  | -1.39736300 | H  | -4.73945300 | -0.29746100 | 1.79931500  |
| O            | -4.08916400        | 1.68486100  | -0.85443700 | H  | -3.22873800 | 1.22417500  | -0.22979600 |
| O            | -2.12530600        | 0.41070700  | -1.70707400 | H  | -4.48063800 | 1.47320500  | 1.76752400  |
| C            | -3.39154500        | 1.91176400  | -3.38210800 | O  | -3.05396600 | 0.38627000  | 2.78443200  |
| F            | -2.34026800        | 1.86020400  | -4.20949600 | N  | -1.76072900 | 0.33048200  | 0.96100800  |
| F            | -4.01784300        | 3.07788800  | -3.55758500 | C  | -3.36106200 | -0.92509700 | -0.38740900 |
| F            | -4.23587200        | 0.92256700  | -3.71142300 | H  | -2.57243800 | -0.97066300 | -1.15390800 |
|              |                    |             |             | H  | -3.21992900 | -1.79813200 | 0.26851300  |
|              |                    |             |             | C  | -4.71925100 | -0.93631100 | -1.02470200 |
|              |                    |             |             | C  | -5.74510600 | -1.74708500 | -0.53313100 |
|              |                    |             |             | C  | -4.99115800 | -0.08326200 | -2.10076500 |
|              |                    |             |             | C  | -7.01540300 | -1.71409300 | -1.10466000 |
|              |                    |             |             | H  | -5.53715500 | -2.42110300 | 0.30014900  |
|              |                    |             |             | C  | -6.25807400 | -0.04846600 | -2.67278700 |
|              |                    |             |             | H  | -4.19449300 | 0.55339600  | -2.48880900 |
|              |                    |             |             | C  | -7.27410700 | -0.86381500 | -2.17575600 |
|              |                    |             |             | H  | -7.80289500 | -2.35656400 | -0.71407100 |
|              |                    |             |             | H  | -6.45354100 | 0.61625700  | -3.51235800 |
|              |                    |             |             | H  | -8.26493100 | -0.83745000 | -2.62556800 |
|              |                    |             |             | Cu | -0.17106300 | 0.37398300  | -0.28055700 |
| <b>INT3'</b> | <b>S**2 = 0.75</b> |             |             |    |             |             |             |
| C            | 2.81549400         | -0.45114000 | 2.72771700  |    |             |             |             |
| C            | 2.41564200         | -0.01734100 | 1.31243300  |    |             |             |             |
| C            | 0.61180400         | -0.06315900 | 2.62745500  |    |             |             |             |
| H            | 3.56404800         | 0.19904100  | 3.19366900  |    |             |             |             |
| H            | 2.65518800         | -0.77701800 | 0.55934600  |    |             |             |             |
| H            | 3.14162600         | -1.49442100 | 2.80091700  |    |             |             |             |
| O            | 1.58972500         | -0.33278600 | 3.50852000  |    |             |             |             |
| N            | 0.95458400         | 0.07853200  | 1.40239400  |    |             |             |             |
| C            | 3.00128000         | 1.32510200  | 0.87015800  |    |             |             |             |
| H            | 2.43805600         | 1.65155200  | -0.01496200 |    |             |             |             |
| H            | 2.83142600         | 2.07095600  | 1.65948300  |    |             |             |             |

|   |             |             |             |
|---|-------------|-------------|-------------|
| C | 1.40209500  | -0.32841400 | -2.66920000 |
| C | 2.49510800  | -2.60822800 | -2.04639700 |
| C | 3.51489000  | -3.54986200 | -2.17379000 |
| C | 4.55618700  | -3.34364000 | -3.07249500 |
| C | 4.55924600  | -2.19465800 | -3.85220800 |
| C | 3.53638900  | -1.26385400 | -3.71175900 |
| C | 2.47721200  | -1.42728400 | -2.80581400 |
| H | 3.49526900  | -4.45121800 | -1.56570000 |
| H | 5.35046500  | -4.08281100 | -3.15802800 |
| H | 5.35880100  | -2.01315400 | -4.56846600 |
| H | 3.56297800  | -0.36304000 | -4.31945700 |
| I | 0.99548700  | -3.16628000 | -0.59521600 |
| O | 1.31762400  | -0.09630800 | -1.29335100 |
| C | 1.80752700  | 0.97841000  | -3.35390900 |
| H | 1.85033700  | 0.90266200  | -4.44840200 |
| H | 1.06204900  | 1.73621000  | -3.09689700 |
| H | 2.77773300  | 1.33259200  | -2.98363600 |
| C | 0.09788800  | -0.83160600 | -3.30685300 |
| H | -0.66358200 | -0.04536500 | -3.26947400 |
| H | 0.26213900  | -1.09856900 | -4.35870000 |
| H | -0.28969400 | -1.71897400 | -2.79345900 |
| S | -1.23161700 | 2.91028200  | -1.39774100 |
| O | 0.12808900  | 3.43912100  | -1.32608700 |
| O | -2.20732900 | 3.37239700  | -0.40417400 |
| O | -1.27778900 | 1.40516600  | -1.61691900 |
| C | -1.90581200 | 3.45237100  | -3.02400600 |
| F | -1.16028800 | 2.97371800  | -4.02391400 |
| F | -1.91414700 | 4.78473500  | -3.08925900 |
| F | -3.16088000 | 3.00741100  | -3.17660900 |

**INT2''**

|   |             |            |             |
|---|-------------|------------|-------------|
| C | -0.96509400 | 3.19803900 | -2.44107900 |
| C | -1.23901700 | 2.34652000 | -1.19052600 |
| C | 0.92884000  | 2.26268800 | -1.68134500 |
| H | -1.12450300 | 4.27159000 | -2.27741100 |
| H | -1.82304100 | 1.44640300 | -1.44204500 |
| H | -1.51131700 | 2.89132700 | -3.33662100 |
| O | 0.45212900  | 3.00282100 | -2.70875600 |
| N | 0.09394000  | 1.88679900 | -0.79256100 |
| C | -1.94765200 | 3.05626000 | -0.03505600 |
| H | -1.64918900 | 2.52951600 | 0.88327900  |
| H | -1.57109800 | 4.08699700 | 0.04964600  |
| C | -3.44382800 | 3.02769300 | -0.17548000 |
| C | -4.18618700 | 4.16143300 | -0.50733400 |
| C | -4.11514200 | 1.81181300 | 0.00702100  |
| C | -5.57109700 | 4.08524800 | -0.64769100 |
| H | -3.67739000 | 5.11621400 | -0.64798100 |
| C | -5.49630000 | 1.73295900 | -0.12809400 |
| H | -3.53128600 | 0.92766100 | 0.27217900  |
| C | -6.22879900 | 2.87299700 | -0.45775100 |
| H | -6.13829900 | 4.97827400 | -0.90286200 |
| H | -6.00130700 | 0.78053200 | 0.03072300  |
| H | -7.31034200 | 2.81736500 | -0.56306200 |
| C | 2.40811000  | 1.99933300 | -1.74794900 |
| C | 3.15496300  | 3.36340100 | -1.63161600 |
| H | 2.81777300  | 3.98965800 | -2.46645500 |
| H | 4.22283700  | 3.16585000 | -1.78072400 |
| C | 2.74102200  | 1.35156300 | -3.12915700 |
| H | 2.30003400  | 1.99079600 | -3.90285400 |
| H | 3.82854800  | 1.38913100 | -3.25559300 |
| C | 2.92197200  | 4.04855000 | -0.31512600 |
| C | 1.79887100  | 4.86049300 | -0.11743800 |
| C | 3.80051900  | 3.85071100 | 0.75578600  |

|    |             |             |             |
|----|-------------|-------------|-------------|
| C  | 1.56010900  | 5.46185200  | 1.11687600  |
| H  | 1.11770400  | 5.03905200  | -0.95072400 |
| C  | 3.57183200  | 4.45747400  | 1.98841200  |
| H  | 4.68593400  | 3.23024400  | 0.60959000  |
| C  | 2.44810800  | 5.26118000  | 2.17443400  |
| H  | 0.68888900  | 6.10064900  | 1.25001000  |
| H  | 4.27515600  | 4.30709300  | 2.80558500  |
| H  | 2.27047100  | 5.74086800  | 3.13492100  |
| C  | 2.25682900  | -0.06794100 | -3.24882800 |
| C  | 3.15833500  | -1.13237600 | -3.13809900 |
| C  | 0.90142300  | -0.35944500 | -3.44378700 |
| C  | 2.72124200  | -2.45230300 | -3.21865000 |
| H  | 4.21848600  | -0.91641700 | -3.00294600 |
| C  | 0.46074100  | -1.67873200 | -3.51920700 |
| H  | 0.18839300  | 0.45654500  | -3.57162800 |
| C  | 1.36926300  | -2.73032300 | -3.40118000 |
| H  | 3.44029300  | -3.26711700 | -3.15362900 |
| H  | -0.59237500 | -1.88782900 | -3.70850200 |
| H  | 1.02851900  | -3.75975500 | -3.47751500 |
| C  | 4.59617400  | -0.13269100 | 0.22565600  |
| C  | 3.26907400  | -0.45418300 | 0.92039100  |
| C  | 2.92222700  | 1.06582600  | -0.67642200 |
| H  | 5.07947000  | -1.00226600 | -0.23306100 |
| H  | 3.32209900  | -0.25460300 | 1.99981100  |
| H  | 5.32070600  | 0.38247400  | 0.86465200  |
| O  | 4.22853300  | 0.78097300  | -0.83872100 |
| N  | 2.32167700  | 0.49354200  | 0.30760600  |
| C  | 2.75831600  | -1.88278100 | 0.70502100  |
| H  | 1.75025800  | -1.93259100 | 1.14749700  |
| H  | 2.63512100  | -2.04526900 | -0.37703300 |
| C  | 3.66981300  | -2.91171300 | 1.30633800  |
| C  | 4.57058800  | -3.62470800 | 0.50990800  |
| C  | 3.67021400  | -3.13911100 | 2.68692900  |
| C  | 5.45136300  | -4.54319900 | 1.07615300  |
| H  | 4.56835100  | -3.46488600 | -0.57009800 |
| C  | 4.54747400  | -4.05609800 | 3.25636300  |
| H  | 2.96353000  | -2.59676000 | 3.31876200  |
| C  | 5.44213600  | -4.75914300 | 2.45128900  |
| H  | 6.14202000  | -5.09470800 | 0.44133400  |
| H  | 4.53049200  | -4.22778700 | 4.33083100  |
| H  | 6.12652800  | -5.47858800 | 2.89559900  |
| Cu | 0.42989000  | 0.59905100  | 0.84007000  |
| C  | -1.93763100 | -0.47914200 | 2.34118300  |
| C  | -3.37278100 | -1.92951100 | 0.83190400  |
| C  | -4.52421100 | -2.58504100 | 0.43309600  |
| C  | -5.61430800 | -2.56042500 | 1.30279600  |
| C  | -5.51686700 | -1.89576600 | 2.52066900  |
| C  | -4.34329000 | -1.23646600 | 2.87106000  |
| C  | -3.23367400 | -1.22803800 | 2.01909000  |
| H  | -4.60340100 | -3.09099300 | -0.52280400 |
| H  | -6.53663400 | -3.05830700 | 1.01295300  |
| H  | -6.36624900 | -1.87785200 | 3.19948500  |
| H  | -4.28624400 | -0.70564300 | 3.81934300  |
| I  | -1.59017500 | -1.84889000 | -0.42494800 |
| O  | -1.37906000 | -0.09158400 | 1.09770900  |
| C  | -2.21485400 | 0.79409700  | 3.13376900  |
| H  | -2.54871900 | 0.57811500  | 4.15526400  |
| H  | -1.29405500 | 1.38393100  | 3.19445400  |
| H  | -2.98035700 | 1.40310800  | 2.63803000  |
| C  | -0.97731700 | -1.39247200 | 3.10656900  |
| H  | -0.02792500 | -0.85964000 | 3.26541100  |
| H  | -1.38090400 | -1.68802000 | 4.08236900  |
| H  | -0.75674400 | -2.30930300 | 2.54407300  |



|   |             |             |             |
|---|-------------|-------------|-------------|
| C | -2.29487800 | -3.69394300 | -1.61660600 |
| F | -1.24358600 | -4.13062700 | -2.31611800 |
| F | -3.27310000 | -3.38200400 | -2.47334900 |
| F | -2.71387300 | -4.67009400 | -0.81511500 |
| O | 0.71075400  | 2.31981900  | 2.37847000  |
| C | 1.67379600  | 2.03644300  | 3.38138700  |
| H | 1.79436900  | 2.87808300  | 4.07613600  |
| H | 1.29890000  | 1.17210100  | 3.93907100  |
| H | 2.65574100  | 1.78775800  | 2.95095100  |
| H | 1.01753300  | 3.09548800  | 1.87605700  |

MeOH

|   |             |             |             |
|---|-------------|-------------|-------------|
| C | 0.65525800  | -0.01935500 | 0.00000100  |
| H | 1.03695200  | -0.54227400 | -0.89272200 |
| H | 1.07267400  | 0.99144500  | -0.00065600 |
| H | 1.03706400  | -0.54116800 | 0.89333200  |
| O | -0.74424800 | 0.12174900  | 0.00000300  |
| H | -1.12425100 | -0.76586900 | 0.00001200  |

TS1'' S\*\*2 = 1.04

|   |             |             |             |
|---|-------------|-------------|-------------|
| C | -4.14829900 | 0.71946200  | 2.17810500  |
| C | -3.20335400 | 1.21022700  | 1.07340000  |
| C | -2.86705000 | -0.96510900 | 1.43412800  |
| H | -5.20903600 | 0.87291800  | 1.95303400  |
| H | -2.55214600 | 2.02091900  | 1.42812300  |
| H | -3.93021300 | 1.12528600  | 3.17072400  |
| O | -3.91264400 | -0.71372300 | 2.23763100  |
| N | -2.37046100 | 0.02972400  | 0.79199200  |
| C | -3.91507600 | 1.65421900  | -0.20878300 |
| H | -3.14159000 | 1.89271300  | -0.95181000 |
| H | -4.47350900 | 0.79264800  | -0.60564400 |
| C | -4.83463100 | 2.81822200  | 0.02410900  |
| C | -6.21929300 | 2.63396200  | 0.07778200  |
| C | -4.32126700 | 4.10156700  | 0.24133100  |
| C | -7.07339000 | 3.70353100  | 0.33578900  |
| H | -6.63172100 | 1.63807200  | -0.09717400 |
| C | -5.17058600 | 5.17239600  | 0.49947900  |
| H | -3.24308400 | 4.26318200  | 0.19852800  |
| C | -6.54952400 | 4.97547500  | 0.54791400  |
| H | -8.14917700 | 3.54311400  | 0.36723700  |
| H | -4.75610000 | 6.16573000  | 0.65958100  |
| H | -7.21386800 | 5.81352100  | 0.74704400  |
| C | -2.47222400 | -2.41778700 | 1.41758800  |
| C | -3.73198200 | -3.23929300 | 1.00536000  |
| H | -4.48030800 | -3.11546200 | 1.79597400  |
| H | -3.44175000 | -4.29606900 | 0.98890600  |
| C | -1.98947700 | -2.84129200 | 2.84372000  |
| H | -2.72486200 | -2.46815600 | 3.56688400  |
| H | -2.01730900 | -3.93647700 | 2.88578200  |
| C | -4.28466600 | -2.80817400 | -0.32709900 |
| C | -5.36043300 | -1.91663900 | -0.40443700 |
| C | -3.69671200 | -3.24840100 | -1.52102400 |
| C | -5.83341900 | -1.47237900 | -1.63793300 |
| H | -5.83847200 | -1.57821500 | 0.51568600  |
| C | -4.16553300 | -2.80338600 | -2.75547000 |
| H | -2.87913800 | -3.96894400 | -1.48147100 |
| C | -5.23294000 | -1.90819700 | -2.81678500 |
| H | -6.68107800 | -0.79055500 | -1.67945500 |
| H | -3.70357000 | -3.16666200 | -3.67201900 |
| H | -5.60499400 | -1.56539500 | -3.78017400 |
| C | -0.60038900 | -2.34343000 | 3.13720700  |
| C | 0.48796300  | -3.21956300 | 3.07187000  |
| C | -0.35389900 | -0.98757700 | 3.38437400  |

|    |             |             |             |
|----|-------------|-------------|-------------|
| C  | 1.79000800  | -2.75567600 | 3.24587800  |
| H  | 0.30588100  | -4.27940600 | 2.89113700  |
| C  | 0.94638600  | -0.51694900 | 3.54284700  |
| H  | -1.18991900 | -0.29156000 | 3.46882800  |
| C  | 2.02254500  | -1.40065600 | 3.47133200  |
| H  | 2.62324400  | -3.45608100 | 3.21609400  |
| H  | 1.11921000  | 0.54038100  | 3.73507600  |
| H  | 3.03844200  | -1.03643900 | 3.61724400  |
| C  | 0.11603500  | -4.14965700 | -0.45949900 |
| C  | 0.36912500  | -2.72021700 | -0.95598100 |
| C  | -1.35333000 | -2.72796200 | 0.46346800  |
| H  | 0.92655500  | -4.53386600 | 0.17282100  |
| H  | 0.15234200  | -2.61599700 | -2.03042400 |
| H  | -0.10297400 | -4.87824400 | -1.24363300 |
| O  | -1.06989900 | -4.03727900 | 0.37599000  |
| N  | -0.62868300 | -1.92528000 | -0.22415200 |
| C  | 1.76999400  | -2.18868500 | -0.66670700 |
| H  | 1.78065600  | -1.12575300 | -0.95272900 |
| H  | 1.92830200  | -2.22191400 | 0.42290000  |
| C  | 2.84082300  | -2.95370900 | -1.38810800 |
| C  | 3.63099700  | -3.88865600 | -0.71365900 |
| C  | 3.03747400  | -2.77351600 | -2.76191300 |
| C  | 4.59582300  | -4.62853600 | -1.39321300 |
| H  | 3.49477000  | -4.02589000 | 0.36078200  |
| C  | 4.00088200  | -3.50981100 | -3.44334500 |
| H  | 2.43265700  | -2.03979400 | -3.29819900 |
| C  | 4.78115400  | -4.44104100 | -2.75999900 |
| H  | 5.20702900  | -5.34871400 | -0.85291700 |
| H  | 4.14791900  | -3.35389500 | -4.51025300 |
| H  | 5.53655200  | -5.01513700 | -3.29219500 |
| Cu | -0.58116000 | 0.07823200  | -0.17754700 |
| C  | 0.83300700  | 2.21917200  | -1.39079600 |
| C  | 3.02179600  | 3.01371500  | -0.30200500 |
| C  | 4.02521800  | 3.94594300  | -0.06924700 |
| C  | 3.96496100  | 5.18017500  | -0.70959000 |
| C  | 2.90694800  | 5.45531300  | -1.56617600 |
| C  | 1.91093600  | 4.50659300  | -1.76821400 |
| C  | 1.92920800  | 3.25708700  | -1.13532600 |
| H  | 4.84335000  | 3.72721300  | 0.61038400  |
| H  | 4.74488000  | 5.91627300  | -0.52941900 |
| H  | 2.84805700  | 6.41458000  | -2.07524300 |
| H  | 1.08621900  | 4.74621900  | -2.43540200 |
| I  | 3.20388500  | 1.12612500  | 0.70693300  |
| O  | 0.58306400  | 1.52691100  | -0.18709000 |
| C  | -0.48623200 | 2.87469200  | -1.80765300 |
| H  | -0.43060900 | 3.36048400  | -2.78875500 |
| H  | -1.24501200 | 2.08583700  | -1.87221600 |
| H  | -0.80845500 | 3.61300500  | -1.06459200 |
| C  | 1.29099400  | 1.25746400  | -2.49554100 |
| H  | 0.52968100  | 0.47479200  | -2.63641600 |
| H  | 1.44055700  | 1.77560300  | -3.45130400 |
| H  | 2.23882400  | 0.77239500  | -2.22818800 |
| C  | 6.00338400  | 1.37533500  | 0.85877900  |
| F  | 6.40929300  | 0.15816200  | 1.17453000  |
| F  | 6.37378900  | 2.24720800  | 1.78733600  |
| F  | 6.45627500  | 1.73656200  | -0.32864600 |
| C  | -2.46142000 | 0.30099600  | -3.49255800 |
| H  | -1.67103300 | 0.90743000  | -3.94431800 |
| H  | -2.78657700 | -0.44825900 | -4.22747300 |
| H  | -3.31384400 | 0.95568700  | -3.25315500 |
| O  | -1.90611700 | -0.30337100 | -2.33565000 |
| H  | -2.57571900 | -0.89878300 | -1.95812700 |

INT3'' S\*\*2 = 0.75

|   |             |             |             |
|---|-------------|-------------|-------------|
| C | 1.30265200  | -3.84048900 | -0.43187600 |
| C | 1.30658700  | -2.37773500 | -0.89283800 |
| C | -0.45181000 | -2.75096400 | 0.44238400  |
| H | 2.12982200  | -4.07596200 | 0.24952200  |
| H | 1.10905200  | -2.28839700 | -1.97233100 |
| H | 1.27507600  | -4.57895400 | -1.23597600 |
| O | 0.06618200  | -3.97840500 | 0.32870600  |
| N | 0.14898100  | -1.80629300 | -0.18437400 |
| C | 2.57374400  | -1.60739500 | -0.53821900 |
| H | 2.41286800  | -0.55250200 | -0.80720800 |
| H | 2.69351000  | -1.63153900 | 0.55611400  |
| C | 3.78991600  | -2.15815800 | -1.22487000 |
| C | 4.71750200  | -2.93389300 | -0.52446000 |
| C | 3.99504900  | -1.93439900 | -2.59086400 |
| C | 5.82564000  | -3.47600600 | -1.17133000 |
| H | 4.57510100  | -3.09933500 | 0.54506700  |
| C | 5.10061100  | -2.47391800 | -3.23974100 |
| H | 3.28515200  | -1.31869400 | -3.14657400 |
| C | 6.01767000  | -3.24820700 | -2.53094200 |
| H | 6.54300800  | -4.07179900 | -0.61056300 |
| H | 5.25234900  | -2.28428500 | -4.30048300 |
| H | 6.88464000  | -3.66673400 | -3.03751400 |
| C | -1.64870800 | -2.67468700 | 1.34730500  |
| C | -1.15508200 | -3.02744400 | 2.79077600  |
| H | -1.00704800 | -4.11324800 | 2.82672700  |
| H | -1.96866900 | -2.78671600 | 3.48616900  |
| C | -2.71808800 | -3.70129800 | 0.86308700  |
| H | -2.23436200 | -4.68428800 | 0.83037000  |
| H | -3.50282800 | -3.74646100 | 1.62623900  |
| C | 0.12518800  | -2.31463900 | 3.13297700  |
| C | 1.33676100  | -3.01276200 | 3.12691000  |
| C | 0.15107700  | -0.93130700 | 3.35252300  |
| C | 2.54452200  | -2.34847500 | 3.33118700  |
| H | 1.32752400  | -4.09157400 | 2.96743800  |
| C | 1.35750000  | -0.26033400 | 3.53174500  |
| H | -0.78432600 | -0.37067600 | 3.39624200  |
| C | 2.55834900  | -0.96853000 | 3.51919900  |
| H | 3.47594600  | -2.91220600 | 3.34840000  |
| H | 1.36198900  | 0.81669600  | 3.68718000  |
| H | 3.49980200  | -0.44438500 | 3.67213000  |
| C | -3.29578500 | -3.33230400 | -0.47816300 |
| C | -4.53252800 | -2.68497600 | -0.57383900 |
| C | -2.57973600 | -3.57899600 | -1.65803300 |
| C | -5.03686700 | -2.28581800 | -1.81050900 |
| H | -5.10997700 | -2.50347800 | 0.33332300  |
| C | -3.07991900 | -3.17725800 | -2.89524700 |
| H | -1.63316400 | -4.11825500 | -1.60884400 |
| C | -4.30769300 | -2.52056600 | -2.97375100 |
| H | -6.00841100 | -1.79806800 | -1.86749200 |
| H | -2.51559600 | -3.39137700 | -3.80147600 |
| H | -4.70272700 | -2.21257500 | -3.93967700 |
| C | -3.89849600 | 0.09652300  | 2.05257300  |
| C | -3.01322400 | 0.76989000  | 0.99690900  |
| C | -2.30315000 | -1.32028700 | 1.36088800  |
| H | -4.96001300 | 0.06793800  | 1.78694500  |
| H | -2.54766200 | 1.68566000  | 1.38539300  |
| H | -3.78925000 | 0.50773600  | 3.06065800  |
| O | -3.41860900 | -1.27712100 | 2.09648500  |
| N | -1.95935900 | -0.23385300 | 0.76434600  |
| C | -3.73269700 | 1.07806800  | -0.32116400 |
| H | -2.98891300 | 1.48194900  | -1.02129500 |
| H | -4.08149100 | 0.12637700  | -0.75069200 |

|    |             |             |             |
|----|-------------|-------------|-------------|
| C  | -4.88293800 | 2.02494100  | -0.13191500 |
| C  | -6.19901300 | 1.55314600  | -0.13062000 |
| C  | -4.65905900 | 3.38682200  | 0.09685900  |
| C  | -7.26817000 | 2.41823900  | 0.08892000  |
| H  | -6.38546400 | 0.49341800  | -0.31665900 |
| C  | -5.72415500 | 4.25418100  | 0.31670500  |
| H  | -3.63828300 | 3.77221400  | 0.09263000  |
| C  | -7.03156500 | 3.77122200  | 0.31419700  |
| H  | -8.28661700 | 2.03539100  | 0.07981900  |
| H  | -5.53454900 | 5.31208100  | 0.48655600  |
| H  | -7.86424100 | 4.45033800  | 0.48346200  |
| Cu | -0.17943600 | 0.13834700  | -0.07109500 |
| C  | 0.86993300  | 2.59468700  | -1.10515500 |
| C  | 2.89371900  | 3.69134900  | 0.07985400  |
| C  | 3.64781800  | 4.81049200  | 0.42617100  |
| C  | 3.24519200  | 6.07865800  | 0.02228000  |
| C  | 2.08786400  | 6.21704700  | -0.73134500 |
| C  | 1.34563600  | 5.09108900  | -1.06656000 |
| C  | 1.71428900  | 3.79664300  | -0.67227800 |
| H  | 4.55513400  | 4.69083200  | 1.01225500  |
| H  | 3.84076000  | 6.94608100  | 0.29798300  |
| H  | 1.75615100  | 7.19907500  | -1.06086400 |
| H  | 0.44176000  | 5.22758700  | -1.65445900 |
| I  | 3.70773600  | 1.83141100  | 0.77437500  |
| O  | 0.70143700  | 1.72662700  | -0.00360000 |
| C  | -0.54047500 | 2.99652700  | -1.55278600 |
| H  | -0.53398300 | 3.58862900  | -2.47450200 |
| H  | -1.10332200 | 2.07723700  | -1.75222700 |
| H  | -1.05633900 | 3.56482600  | -0.77024000 |
| C  | 1.55470900  | 1.85105800  | -2.26053500 |
| H  | 0.97367400  | 0.95068100  | -2.51259200 |
| H  | 1.62383600  | 2.48604200  | -3.15208400 |
| H  | 2.57032800  | 1.54312500  | -1.98618300 |
| C  | -1.81986200 | 0.17005100  | -3.50088900 |
| H  | -1.11778900 | 0.92967000  | -3.85613600 |
| H  | -1.92876600 | -0.59435100 | -4.28204900 |
| H  | -2.79778600 | 0.64554200  | -3.32986600 |
| O  | -1.27236100 | -0.37321100 | -2.30849400 |
| H  | -1.85026700 | -1.10087700 | -2.02043800 |
